# Supplementary material for: A theoretical study of complexes between fullerenes and concave receptors with interest in photovoltaics
Source: Royal Society of Chemistry journal article supplement (doi:10.1039/c7cp03665e), 2017-01-01
Supplement: c7cp03665e1.pdf [file c7cp03665e1.pdf]

**Supporting Information**  
**for**  
**Theoretical study of complexes between fullerenes and concave**  
**receptors with interest in photovoltaics**

E. M. Cabaleiro-Lago,<sup>a</sup> J. Rodríguez-Otero<sup>b</sup>, J. A. Carrazana-García<sup>a</sup>

---

<sup>a</sup> *Facultade de Ciencias (Dpto. de Química Física), Universidade de Santiago de Compostela, Campus de Lugo. Avda. Alfonso X El Sabio s/n 27002 Lugo, Galicia (Spain).*

<sup>b</sup> *CIQUS and Facultade de Química (Dpto. de Química Física), Universidade de Santiago de Compostela, 15782 Santiago de Compostela, Galicia (Spain).*

|                                                                                                                                                                                                                                                                                                                                                                                               |                 |
|-----------------------------------------------------------------------------------------------------------------------------------------------------------------------------------------------------------------------------------------------------------------------------------------------------------------------------------------------------------------------------------------------|-----------------|
| <b>Table S1.</b> Complexation energies for complexes obtained at the B97-D2/def2-TZVP//B97-D2/def2-SVP level in the initial search of the most stable structure for each dimer                                                                                                                                                                                                                | <b>Page S1</b>  |
| <b>Table S2.</b> Number of contacts below 4 Å between non-hydrogen atoms for the dimers studied.                                                                                                                                                                                                                                                                                              | <b>Page S2</b>  |
| <b>Table S3.</b> Energy components of the complexation energy obtained with the def2-TZVP basis set. B97-D2/def2-TZVP geometry. The 3-body term is the same for B3LYP and TPSS.                                                                                                                                                                                                               | <b>Page S3</b>  |
| <b>Table S4.</b> Solvent effect (kcal/mol) upon complexation energies as obtained at the B3LYP/def2-TZVP level of calculation.                                                                                                                                                                                                                                                                | <b>Page S4</b>  |
| <b>Table S5.</b> SAPT(DFT) values obtained for complexes with C <sub>60</sub> .                                                                                                                                                                                                                                                                                                               | <b>Page S5</b>  |
| <b>Table S6.</b> Summary of the 12 most intense transitions in <b>cora</b> complexes. N <sub>tr</sub> is the number of the transition, the transition from the ground state to the N <sup>th</sup> excited state. The values are ordered by decreasing value of the oscillator strength. q and R are the amount of charge transferred and the transfer distance as commented in the text.     | <b>Page S6</b>  |
| <b>Table S7.</b> Summary of the 12 most intense transitions in <b>suma</b> complexes. N <sub>tr</sub> is the number of the transition, the transition from the ground state to the N <sup>th</sup> excited state. The values are ordered by decreasing value of the oscillator strength. q and R are the amount of charge transferred and the transfer distance as commented in the text.     | <b>Page S7</b>  |
| <b>Table S8.</b> Summary of the 12 most intense transitions in <b>porf</b> complexes. N <sub>tr</sub> is the number of the transition, the transition from the ground state to the N <sup>th</sup> excited state. The values are ordered by decreasing value of the oscillator strength. q and R are the amount of charge transferred and the transfer distance as commented in the text.     | <b>Page S8</b>  |
| <b>Table S9.</b> Summary of the 12 most intense transitions in <b>sbpc</b> complexes. N <sub>tr</sub> is the number of the transition, the transition from the ground state to the N <sup>th</sup> excited state. The values are ordered by decreasing value of the oscillator strength. q and R are the amount of charge transferred and the transfer distance as commented in the text.     | <b>Page S9</b>  |
| <b>Table S10.</b> Summary of the 12 most intense transitions in <b>cora5CN</b> complexes. N <sub>tr</sub> is the number of the transition, the transition from the ground state to the N <sup>th</sup> excited state. The values are ordered by decreasing value of the oscillator strength. q and R are the amount of charge transferred and the transfer distance as commented in the text. | <b>Page S10</b> |

**Figure S1.** Molecular Electrostatic Potentials (MEP) of the bowls employed in this work at the B3LYP-D/def2-TZVP level by the convex face. MEP mapped onto a isodensity surface of 0.002 a.u. Colour scale runs from -0.010 a.u. (red) to 0.010 a.u (blue). White is 0.0.

Page S11

**Figure S2.** Representation of the starting structures employed for searching the minimum energy structures of the dimers. The corannulene-C<sub>70</sub> case is shown.

Page S12

**Figure S3.** Frontier orbital energies of the molecules studied at the B3LYP/def2-TZVP//B97-D2/def2-TZVP level. Numbers correspond to the HOMO-LUMO gap.

Page S13

**Figure S4.** Another view of the most stable structures found for the complexes studied at the B3LYP-D/def2-TZVP//B97-D2/def2-TZVP shown in Figure 5. The bowl is shown in ochre, with the complex observed from the bottom of the bowl.

Page S14

**Figure S5.** Complexation energies of the complexes studied. B3LYP-D/def2-TZVP+ 3-body results.

Page S15

**Figure S6.** Non covalent interaction index for the isolated molecules. The product of the density times the sign of the second eigenvalue of its Hessian is mapped onto an isosurface of reduced density gradient with value 0.5 a.u.; the color scale goes from -0.1 au (blue) to +0.1 au (red).

Page S16

**Figure S7.** NCI plots for the most stable minima found for the dimers formed with cora (left) and suma (right) at the B3LYP-D/def2-TZVP level. Values corresponding to a isosurface of reduced density gradient of 0.5 a.u.; colour scale runs from -0.025 to 0.025.

Page S17

**Figure S8.** NCI plots for the most stable minima found for the dimers formed with porf (left) and sbpc (right) at the B3LYP-D/def2-TZVP level. Values corresponding to a isosurface of reduced density gradient of 0.5 a.u.; colour scale runs from -0.025 to 0.025.

Page S18

**Figure S9.** NCI plots for the most stable minima found for the dimers formed with cora5CN at the B3LYP-D/def2-TZVP level. Values corresponding to a isosurface of reduced density gradient of 0.5 a.u.; colour scale runs from -0.025 to 0.025.

Page S19

**Figure S10.** Schematic representation of the energy levels of highest occupied and lowest unoccupied molecular orbitals in the dimers studied. B3LYP-D/def2-TZVP//B97-D2/def2-TZVP.

Page S20

**Figure S11.** Predicted absorption spectra of the dimers studied as obtained at the CAM-B3LYP/TZVP level.

Page S21

**Figure S12.** Density difference upon transition for the four most intense transitions in cora complexes. The numbers are the number of the transition/ oscillator strength \* 100/ wavenumber (nm). Surfaces correspond to +0.001 a.u. (blue) and -0.001 a.u. (red).

**Page S22**

**Figure S13.** Density difference upon transition for the four most intense transitions in suma complexes. The numbers are the number of the transition/ oscillator strength \* 100/ wavenumber (nm). Surfaces correspond to +0.001 a.u. (blue) and -0.001 a.u. (red).

**Page S23**

**Figure S14.** Density difference upon transition for the four most intense transitions in porf complexes. The numbers are the number of the transition/ oscillator strength \* 100/ wavenumber (nm). Surfaces correspond to +0.001 a.u. (blue) and -0.001 a.u. (red).

**Page S24**

**Figure S15.** Density difference upon transition for the four most intense transitions in sbpc complexes. The numbers are the number of the transition/ oscillator strength \* 100/ wavenumber (nm). Surfaces correspond to +0.001 a.u. (blue) and -0.001 a.u. (red).

**Page S25**

**Figure S16.** Density difference upon transition for the four most intense transitions in cora5CN complexes. The numbers are the number of the transition/ oscillator strength \* 100/ wavenumber (nm). Surfaces correspond to +0.001 a.u. (blue) and -0.001 a.u. (red).

**Page S26**

Cartesian coordinates in Å of the molecules studied and their most stable dimers at the B97-D2/def2-TZVP level.

**Pages S27-S51**

**Table S1.** Complexation energies for complexes obtained at the B97-D2/def2-TZVP//B97-D2/def2-SVP level in the initial search of the most stable structure for each dimer.

|                                      | cora   | suma   | porf   | sbpc   | cora5CN |
|--------------------------------------|--------|--------|--------|--------|---------|
| C <sub>60</sub> -a                   | -14.76 | -18.45 | -17.71 | -24.35 | -22.59  |
| C <sub>60</sub> -b                   | -17.49 | -20.22 | -18.69 | -24.37 | -22.26  |
| C <sub>60</sub> -c                   | -16.82 | -20.09 | -18.64 | -24.01 | -21.95  |
| C <sub>60</sub> -d                   | -17.09 | -18.34 | -17.73 | -24.50 | -22.61  |
| C <sub>60</sub> -e                   | -16.95 | -18.24 | -18.65 | -23.92 | -21.95  |
| C <sub>60</sub> -f                   | -17.62 | -18.62 | -18.68 | -24.30 | -22.22  |
| C <sub>70</sub> -a                   | -18.72 | -20.72 | -20.47 | -25.83 | -24.27  |
| C <sub>70</sub> -b                   | -17.27 | -18.46 | -17.66 | -24.56 | -22.45  |
| C <sub>70</sub> -c                   | -17.25 | -19.56 | -21.08 | -25.86 | -24.26  |
| C <sub>70</sub> -d                   | -17.24 | -18.46 | -17.61 | -24.57 | -22.49  |
| C <sub>70</sub> -e                   | -17.25 | -19.57 | -20.36 | -25.84 | -24.26  |
| C <sub>70</sub> -f                   | -18.70 | -18.55 | -21.08 | -24.32 | -24.07  |
| Sc <sub>3</sub> N@C <sub>68</sub> -a | -18.88 | -19.75 | -21.56 | -26.78 | -26.28  |
| Sc <sub>3</sub> N@C <sub>68</sub> -b | -17.68 | -20.23 | -21.24 | -26.27 | -23.61  |
| Sc <sub>3</sub> N@C <sub>68</sub> -c | -19.11 | -19.77 | -21.94 | -26.27 | -24.50  |
| Sc <sub>3</sub> N@C <sub>68</sub> -d | -18.87 | -19.78 | -21.55 | -26.79 | -26.46  |
| Sc <sub>3</sub> N@C <sub>68</sub> -e | -18.97 | -20.22 | -21.24 | -25.66 | -24.49  |
| Sc <sub>3</sub> N@C <sub>68</sub> -f | -18.09 | -20.07 | -17.55 | -25.65 | -22.24  |
| Sc <sub>3</sub> N@C <sub>80</sub> -a | -16.69 | -19.36 | -21.37 | -26.12 | -26.97  |
| Sc <sub>3</sub> N@C <sub>80</sub> -b | -20.44 | -22.96 | -21.81 | -28.50 | -25.28  |
| Sc <sub>3</sub> N@C <sub>80</sub> -c | -21.35 | -23.20 | -21.98 | -28.41 | -24.40  |
| Sc <sub>3</sub> N@C <sub>80</sub> -d | -18.63 | -19.51 | -21.27 | -26.37 | -27.22  |
| Sc <sub>3</sub> N@C <sub>80</sub> -e | -20.75 | -21.90 | -22.32 | -28.59 | -26.34  |
| Sc <sub>3</sub> N@C <sub>80</sub> -f | -20.18 | -22.39 | -22.58 | -28.28 | -26.37  |

The values obtained with the B97-D2/def2-TZVP optimised geometry are -14.53, -17.80, -17.09, -17.42, -16.99, -17.90 kcal/mol for cora-C<sub>60</sub>-a to cora-C<sub>60</sub>-f, respectively.

**Table S2.** Number of contacts below 4 Å between non-hydrogen atoms for the dimers studied.

|                                               | $N_{\text{contacts} < 4 \text{ \AA}}$ | Sum (R) | $R_{\text{average}}$ |
|-----------------------------------------------|---------------------------------------|---------|----------------------|
| <b>cora-C<sub>60</sub></b>                    | 78                                    | 283.08  | 3.63                 |
| <b>cora-C<sub>70</sub></b>                    | 78                                    | 282.16  | 3.62                 |
| <b>cora-Sc<sub>3</sub>N@C<sub>68</sub></b>    | 75                                    | 270.76  | 3.61                 |
| <b>cora-Sc<sub>3</sub>N@C<sub>80</sub></b>    | 80                                    | 287.70  | 3.60                 |
| <b>suma-C<sub>60</sub></b>                    | 84                                    | 299.91  | 3.57                 |
| <b>suma-C<sub>70</sub></b>                    | 80                                    | 286.93  | 3.59                 |
| <b>suma-Sc<sub>3</sub>N@C<sub>68</sub></b>    | 74                                    | 264.16  | 3.57                 |
| <b>suma-Sc<sub>3</sub>N@C<sub>80</sub></b>    | 84                                    | 301.58  | 3.59                 |
| <b>porf-C<sub>60</sub></b>                    | 59                                    | 213.60  | 3.62                 |
| <b>porf-C<sub>70</sub></b>                    | 71                                    | 254.55  | 3.59                 |
| <b>porf-Sc<sub>3</sub>N@C<sub>68</sub></b>    | 74                                    | 268.74  | 3.63                 |
| <b>porf-Sc<sub>3</sub>N@C<sub>80</sub></b>    | 74                                    | 267.66  | 3.62                 |
| <b>sbpc-C<sub>60</sub></b>                    | 109                                   | 396.39  | 3.64                 |
| <b>sbpc-C<sub>70</sub></b>                    | 100                                   | 359.14  | 3.59                 |
| <b>sbpc-Sc<sub>3</sub>N@C<sub>68</sub></b>    | 111                                   | 405.17  | 3.65                 |
| <b>sbpc-Sc<sub>3</sub>N@C<sub>80</sub></b>    | 115                                   | 416.21  | 3.62                 |
| <b>cora5CN-C<sub>60</sub></b>                 | 92                                    | 334.49  | 3.64                 |
| <b>cora5CN-C<sub>70</sub></b>                 | 96                                    | 348.37  | 3.63                 |
| <b>cora5CN-Sc<sub>3</sub>N@C<sub>68</sub></b> | 103                                   | 375.57  | 3.65                 |
| <b>cora5CN-Sc<sub>3</sub>N@C<sub>80</sub></b> | 103                                   | 375.84  | 3.65                 |

**Table S3.** Energy components of the complexation energy obtained with the def2-TZVP basis set. B97-D2/def2-TZVP geometry. The 3-body term is the same for B3LYP and TPSS.

|                                           | B3LYP-D |        |      | TPSS-D |        |      | 3body | B97-D2 |        |      |
|-------------------------------------------|---------|--------|------|--------|--------|------|-------|--------|--------|------|
|                                           | B3LYP   | D      | BSSE | TPSS   | D      | BSSE |       | B97    | D2     | BSSE |
| cora-C <sub>60</sub>                      | 11.99   | -28.49 | 0.96 | 9.16   | -25.13 | 0.80 | 1.29  | 16.21  | -34.11 | 0.97 |
| cora-C <sub>70</sub>                      | 12.29   | -30.38 | 0.90 | 9.54   | -26.82 | 0.78 | 1.41  | 17.00  | -36.11 | 0.94 |
| cora-Sc <sub>3</sub> N@C <sub>68</sub>    | 12.36   | -29.03 | 1.05 | 9.68   | -25.74 | 0.90 | 1.78  | 17.05  | -36.55 | 1.08 |
| cora-Sc <sub>3</sub> N@C <sub>80</sub>    | 12.69   | -31.04 | 1.12 | 9.52   | -27.45 | 0.97 | 1.53  | 17.08  | -38.47 | 1.16 |
| suma-C <sub>60</sub>                      | 14.79   | -32.69 | 0.94 | 10.99  | -28.53 | 0.81 | 1.38  | 20.32  | -41.03 | 0.99 |
| suma-C <sub>70</sub>                      | 14.91   | -33.37 | 0.86 | 11.52  | -29.27 | 0.77 | 1.48  | 20.64  | -41.62 | 0.95 |
| suma-Sc <sub>3</sub> N@C <sub>68</sub>    | 13.43   | -30.32 | 1.16 | 10.31  | -26.70 | 0.99 | 0.81  | 18.74  | -40.04 | 1.22 |
| suma-Sc <sub>3</sub> N@C <sub>80</sub>    | 14.17   | -33.76 | 1.18 | 10.97  | -29.71 | 1.05 | 1.73  | 20.56  | -43.84 | 1.25 |
| porf-C <sub>60</sub>                      | 9.73    | -26.86 | 1.19 | 6.69   | -23.82 | 1.27 | 1.38  | 13.05  | -32.02 | 1.21 |
| porf-C <sub>70</sub>                      | 12.61   | -32.16 | 1.40 | 9.13   | -28.32 | 1.48 | 1.58  | 17.00  | -38.61 | 1.45 |
| porf-Sc <sub>3</sub> N@C <sub>68</sub>    | 11.23   | -30.11 | 1.48 | 8.31   | -26.73 | 1.52 | 0.40  | 15.51  | -38.17 | 1.47 |
| porf-Sc <sub>3</sub> N@C <sub>80</sub>    | 11.85   | -31.37 | 1.61 | 8.23   | -27.81 | 1.71 | 2.00  | 16.22  | -39.32 | 1.67 |
| sbpc-C <sub>60</sub>                      | 16.09   | -39.01 | 1.08 | 12.93  | -34.58 | 0.99 | 2.00  | 21.77  | -47.01 | 1.18 |
| sbpc-C <sub>70</sub>                      | 16.38   | -40.62 | 1.12 | 13.28  | -36.04 | 1.02 | 2.10  | 22.52  | -48.75 | 1.23 |
| sbpc-Sc <sub>3</sub> N@C <sub>68</sub>    | 17.99   | -40.23 | 1.44 | 14.35  | -35.92 | 1.25 | 1.21  | 23.14  | -50.22 | 1.46 |
| sbpc-Sc <sub>3</sub> N@C <sub>80</sub>    | 17.03   | -41.87 | 1.53 | 13.38  | -37.26 | 1.41 | 2.00  | 23.48  | -52.58 | 1.63 |
| cora5CN-C <sub>60</sub>                   | 13.61   | -35.67 | 0.86 | 10.67  | -31.59 | 0.67 | 1.75  | 18.59  | -41.68 | 0.87 |
| cora5CN-C <sub>70</sub>                   | 14.05   | -37.97 | 0.88 | 10.97  | -33.63 | 0.76 | 1.88  | 19.59  | -44.25 | 0.97 |
| cora5CN-Sc <sub>3</sub> N@C <sub>68</sub> | 13.90   | -38.12 | 1.14 | 10.66  | -33.83 | 0.94 | 1.78  | 19.71  | -46.39 | 1.15 |
| cora5CN-Sc <sub>3</sub> N@C <sub>80</sub> | 12.34   | -38.96 | 1.08 | 8.96   | -34.54 | 0.95 | 2.20  | 18.14  | -45.86 | 1.16 |

**Table S4.** Electrostatic effect due to the solvent (kcal/mol) upon complexation energies as obtained with the COSMO model at the B3LYP/def2-TZVP level of calculation.

|                                            |      |                                               |      |
|--------------------------------------------|------|-----------------------------------------------|------|
| <b>cora-C<sub>60</sub></b>                 | 0.77 | <b>porf-C<sub>60</sub></b>                    | 0.72 |
| <b>cora-C<sub>70</sub></b>                 | 0.77 | <b>porf-C<sub>70</sub></b>                    | 0.78 |
| <b>cora-Sc<sub>3</sub>N@C<sub>68</sub></b> | 0.57 | <b>porf-Sc<sub>3</sub>N@C<sub>68</sub></b>    | 0.62 |
| <b>cora-Sc<sub>3</sub>N@C<sub>80</sub></b> | 0.60 | <b>porf-Sc<sub>3</sub>N@C<sub>80</sub></b>    | 0.67 |
| <b>suma-C<sub>60</sub></b>                 | 0.83 | <b>sbpc-C<sub>60</sub></b>                    | 1.13 |
| <b>suma-C<sub>70</sub></b>                 | 0.84 | <b>sbpc-C<sub>70</sub></b>                    | 1.09 |
| <b>suma-Sc<sub>3</sub>N@C<sub>68</sub></b> | 0.62 | <b>sbpc-Sc<sub>3</sub>N@C<sub>68</sub></b>    | 0.88 |
| <b>suma-Sc<sub>3</sub>N@C<sub>80</sub></b> | 0.72 | <b>sbpc-Sc<sub>3</sub>N@C<sub>80</sub></b>    | 1.03 |
| <b>cora5CN-C<sub>60</sub></b>              | 1.56 | <b>cora5CN-Sc<sub>3</sub>N@C<sub>68</sub></b> | 1.77 |
| <b>cora5CN-C<sub>70</sub></b>              | 1.48 | <b>cora5CN-Sc<sub>3</sub>N@C<sub>80</sub></b> | 1.86 |



**Table S5.** SAPT(DFT) values (kcal/mol) obtained for complexes with C<sub>60</sub>.

|                | <b>Electrostatic</b> | <b>Induction</b> | <b>Repulsion</b> | <b>Dispersion</b> |
|----------------|----------------------|------------------|------------------|-------------------|
| <b>cora</b>    | -16.44               | -0.47            | 38.55            | -27.9             |
| <b>suma</b>    | -21.65               | -0.75            | 50.13            | -33.5             |
| <b>porf</b>    | -14.21               | -1.72            | 33.95            | -25.4             |
| <b>sbpc</b>    | -19.81               | -0.73            | 48.17            | -37.5             |
| <b>cora5CN</b> | -16.83               | -1.85            | 40.84            | -32.4             |

SAPT(DFT) calculations have been performed with the PBE functional and the def2-SVP basis set. These calculations need a shift parameter obtained as the sum of the ionization potential and the energy of the highest occupied molecular orbital. Orbital energies and ionization potentials have been obtained by using the PBE functional with the def2-SVP basis set.

**Table S6.** Summary of the 12 most intense transitions in **cora** complexes.  $N_{tr}$  is the number of the transition, the transition from the ground state to the  $N^{th}$  excited state. The values are ordered by decreasing value of the oscillator strength.  $q$  and  $R$  are the amount of charge transferred and the transfer distance as commented in the text.

| $C_{60}$  |                   |          |      |                | $Sc_3N@C_{68}$ |                   |          |      |                |
|-----------|-------------------|----------|------|----------------|----------------|-------------------|----------|------|----------------|
| $\nu$ /nm | $f_{osc}/10^{-2}$ | $N_{tr}$ | $q$  | $R/\text{\AA}$ | $\nu$ /nm      | $f_{osc}/10^{-2}$ | $N_{tr}$ | $q$  | $R/\text{\AA}$ |
| 349.4     | 0.1               | 19       | 0.69 | 4.97           | 430.6          | 13.7              | 9        | 0.44 | 1.16           |
| 348.9     | 0.1               | 20       | 0.65 | 5.05           | 426.9          | 9.4               | 10       | 0.43 | 1.30           |
| 431.4     | 0.1               | 11       | 0.37 | 0.78           | 472.0          | 6.1               | 6        | 0.56 | 0.25           |
| 423.0     | 0.1               | 15       | 0.42 | 0.35           | 472.3          | 5.4               | 5        | 0.58 | 0.17           |
| 345.7     | 0.1               | 22       | 0.50 | 4.03           | 398.2          | 1.4               | 16       | 0.37 | 0.30           |
| 342.7     | 0.1               | 24       | 0.64 | 4.77           | 531.0          | 1.2               | 2        | 0.41 | 0.25           |
| 354.9     | 0.1               | 17       | 0.30 | 2.38           | 373.0          | 1.1               | 22       | 0.35 | 0.16           |
| 430.5     | 0.1               | 12       | 0.38 | 0.67           | 530.0          | 0.8               | 3        | 0.40 | 0.29           |
| 348.6     | 0.1               | 21       | 0.74 | 5.20           | 414.5          | 0.7               | 14       | 0.42 | 0.27           |
| 426.5     | 0.0               | 14       | 0.37 | 0.47           | 413.5          | 0.5               | 15       | 0.46 | 0.13           |
| 344.9     | 0.0               | 23       | 0.72 | 5.28           | 373.9          | 0.3               | 21       | 0.52 | 0.19           |
| 427.1     | 0.0               | 13       | 0.38 | 0.53           | 384.5          | 0.3               | 18       | 0.41 | 0.25           |
| $C_{70}$  |                   |          |      |                | $Sc_3N@C_{80}$ |                   |          |      |                |
| $\nu$ /nm | $f_{osc}/10^{-2}$ | $N_{tr}$ | $q$  | $R/\text{\AA}$ | $\nu$ /nm      | $f_{osc}/10^{-2}$ | $N_{tr}$ | $q$  | $R/\text{\AA}$ |
| 458.1     | 5.8               | 8        | 0.34 | 1.13           | 437.1          | 1.5               | 17       | 0.57 | 0.68           |
| 471.4     | 3.6               | 6        | 0.49 | 1.79           | 433.7          | 0.9               | 18       | 0.55 | 0.71           |
| 472.1     | 3.0               | 5        | 0.39 | 0.98           | 512.7          | 0.8               | 1        | 0.63 | 0.39           |
| 461.5     | 2.6               | 7        | 0.45 | 2.76           | 433.1          | 0.8               | 19       | 0.55 | 0.63           |
| 477.4     | 0.5               | 3        | 0.44 | 2.20           | 422.6          | 0.8               | 22       | 0.57 | 0.40           |
| 454.0     | 0.4               | 9        | 0.60 | 3.31           | 452.5          | 0.8               | 13       | 0.65 | 0.98           |
| 479.4     | 0.4               | 2        | 0.44 | 1.53           | 477.8          | 0.6               | 6        | 0.58 | 0.60           |
| 442.2     | 0.1               | 10       | 0.26 | 0.66           | 459.0          | 0.6               | 12       | 0.66 | 0.65           |
| 475.5     | 0.1               | 4        | 0.41 | 1.72           | 467.0          | 0.5               | 10       | 0.63 | 0.50           |
| 417.5     | 0.0               | 14       | 0.50 | 0.91           | 429.2          | 0.5               | 20       | 0.61 | 0.67           |
| 418.5     | 0.0               | 13       | 0.44 | 1.02           | 483.0          | 0.4               | 5        | 0.66 | 1.06           |
| 380.4     | 0.0               | 22       | 0.30 | 0.80           | 501.9          | 0.4               | 2        | 0.60 | 0.32           |

**Table S7.** Summary of the 12 most intense transitions in **suma** complexes.  $N_{tr}$  is the number of the transition, the transition from the ground state to the  $N^{th}$  excited state. The values are ordered by decreasing value of the oscillator strength.  $q$  and  $R$  are the amount of charge transferred and the transfer distance as commented in the text.

| $C_{60}$  |                   |          |      |                | $Sc_3N@C_{68}$ |                   |          |      |                |
|-----------|-------------------|----------|------|----------------|----------------|-------------------|----------|------|----------------|
| $\nu$ /nm | $f_{osc}/10^{-2}$ | $N_{tr}$ | $q$  | $R/\text{\AA}$ | $\nu$ /nm      | $f_{osc}/10^{-2}$ | $N_{tr}$ | $q$  | $R/\text{\AA}$ |
| 414.8     | 2.4               | 17       | 0.84 | 5.11           | 429.7          | 13.2              | 9        | 0.42 | 1.00           |
| 421.1     | 0.2               | 15       | 0.42 | 0.56           | 428.1          | 10.5              | 10       | 0.43 | 1.34           |
| 413.9     | 0.2               | 19       | 0.74 | 4.78           | 471.5          | 5.0               | 6        | 0.58 | 0.27           |
| 485.2     | 0.2               | 7        | 0.41 | 1.21           | 476.0          | 5.0               | 5        | 0.57 | 0.15           |
| 413.9     | 0.1               | 18       | 0.72 | 4.83           | 398.3          | 1.4               | 16       | 0.37 | 0.63           |
| 350.1     | 0.0               | 24       | 0.25 | 1.05           | 532.0          | 1.0               | 2        | 0.40 | 0.20           |
| 434.2     | 0.0               | 12       | 0.41 | 2.85           | 528.3          | 1.0               | 3        | 0.41 | 0.22           |
| 434.2     | 0.0               | 11       | 0.43 | 2.69           | 373.1          | 1.0               | 22       | 0.47 | 2.68           |
| 432.4     | 0.0               | 13       | 0.43 | 3.26           | 413.3          | 0.9               | 15       | 0.46 | 0.35           |
| 431.9     | 0.0               | 14       | 0.43 | 3.20           | 420.5          | 0.6               | 11       | 0.51 | 0.26           |
| 487.7     | 0.0               | 5        | 0.37 | 0.56           | 375.3          | 0.5               | 21       | 0.51 | 4.00           |
| 487.5     | 0.0               | 6        | 0.36 | 0.61           | 415.1          | 0.4               | 14       | 0.43 | 0.41           |
| $C_{70}$  |                   |          |      |                | $Sc_3N@C_{80}$ |                   |          |      |                |
| $\nu$ /nm | $f_{osc}/10^{-2}$ | $N_{tr}$ | $q$  | $R/\text{\AA}$ | $\nu$ /nm      | $f_{osc}/10^{-2}$ | $N_{tr}$ | $q$  | $R/\text{\AA}$ |
| 466.4     | 8.8               | 7        | 0.51 | 3.39           | 433.8          | 1.4               | 17       | 0.56 | 0.63           |
| 472.0     | 3.5               | 5        | 0.40 | 0.96           | 450.6          | 1.2               | 13       | 0.66 | 0.85           |
| 471.4     | 2.9               | 6        | 0.44 | 0.76           | 431.8          | 1.0               | 18       | 0.54 | 0.14           |
| 462.2     | 1.3               | 8        | 0.52 | 4.42           | 421.5          | 0.9               | 22       | 0.57 | 0.47           |
| 449.4     | 1.3               | 11       | 0.63 | 0.58           | 429.9          | 0.9               | 19       | 0.56 | 0.63           |
| 450.3     | 0.5               | 10       | 0.48 | 1.48           | 509.5          | 0.9               | 1        | 0.63 | 0.31           |
| 475.1     | 0.3               | 4        | 0.55 | 0.74           | 474.7          | 0.6               | 6        | 0.62 | 0.72           |
| 454.1     | 0.3               | 9        | 0.59 | 1.10           | 422.6          | 0.5               | 21       | 0.59 | 0.76           |
| 423.8     | 0.3               | 14       | 0.60 | 4.13           | 498.3          | 0.5               | 2        | 0.59 | 0.36           |
| 478.6     | 0.2               | 3        | 0.35 | 2.76           | 477.6          | 0.5               | 5        | 0.65 | 1.03           |
| 438.1     | 0.1               | 12       | 0.37 | 2.60           | 496.7          | 0.4               | 3        | 0.58 | 0.24           |
| 419.4     | 0.1               | 15       | 0.43 | 2.43           | 469.7          | 0.4               | 8        | 0.63 | 0.70           |

**Table S8.** Summary of the 12 most intense transitions in **porf** complexes.  $N_{tr}$  is the number of the transition, the transition from the ground state to the  $N^{th}$  excited state. The values are ordered by decreasing value of the oscillator strength.  $q$  and  $R$  are the amount of charge transferred and the transfer distance as commented in the text.

| $C_{60}$  |                   |          |      |                | $Sc_3N@C_{68}$ |                   |          |      |                |
|-----------|-------------------|----------|------|----------------|----------------|-------------------|----------|------|----------------|
| $\nu$ /nm | $f_{osc}/10^{-2}$ | $N_{tr}$ | $q$  | $R/\text{\AA}$ | $\nu$ /nm      | $f_{osc}/10^{-2}$ | $N_{tr}$ | $q$  | $R/\text{\AA}$ |
| 470.6     | 4.2               | 15       | 0.59 | 4.28           | 432.9          | 15.3              | 12       | 0.48 | 2.79           |
| 507.6     | 3.4               | 2        | 0.67 | 3.98           | 476.4          | 10.0              | 7        | 0.57 | 0.20           |
| 456.8     | 0.8               | 18       | 0.66 | 5.24           | 433.4          | 4.6               | 11       | 0.43 | 2.38           |
| 499.2     | 0.5               | 4        | 0.14 | 0.12           | 472.2          | 4.1               | 8        | 0.56 | 0.27           |
| 495.5     | 0.4               | 6        | 0.57 | 3.95           | 416.7          | 2.3               | 19       | 0.47 | 3.89           |
| 489.4     | 0.4               | 10       | 0.50 | 2.90           | 419.4          | 2.1               | 17       | 0.56 | 3.83           |
| 427.1     | 0.3               | 20       | 0.41 | 0.49           | 424.2          | 1.6               | 14       | 0.67 | 5.20           |
| 425.8     | 0.3               | 21       | 0.40 | 0.40           | 398.6          | 1.3               | 22       | 0.36 | 0.40           |
| 497.9     | 0.2               | 5        | 0.14 | 0.09           | 535.9          | 1.3               | 2        | 0.40 | 0.52           |
| 422.7     | 0.1               | 23       | 0.38 | 1.49           | 435.2          | 0.9               | 10       | 0.52 | 0.42           |
| 493.5     | 0.1               | 8        | 0.47 | 3.73           | 528.1          | 0.5               | 3        | 0.42 | 0.10           |
| 425.0     | 0.1               | 22       | 0.38 | 0.68           | 413.7          | 0.5               | 21       | 0.52 | 0.38           |
| $C_{70}$  |                   |          |      |                | $Sc_3N@C_{80}$ |                   |          |      |                |
| $\nu$ /nm | $f_{osc}/10^{-2}$ | $N_{tr}$ | $q$  | $R/\text{\AA}$ | $\nu$ /nm      | $f_{osc}/10^{-2}$ | $N_{tr}$ | $q$  | $R/\text{\AA}$ |
| 518.1     | 4.3               | 3        | 0.91 | 4.55           | 432.6          | 1.6               | 21       | 0.58 | 0.25           |
| 470.1     | 3.2               | 12       | 0.54 | 1.80           | 435.7          | 1.3               | 19       | 0.57 | 0.67           |
| 435.1     | 2.6               | 18       | 0.81 | 7.48           | 515.1          | 0.8               | 1        | 0.63 | 0.32           |
| 461.8     | 2.6               | 13       | 0.41 | 0.97           | 423.9          | 0.8               | 24       | 0.55 | 0.38           |
| 471.0     | 2.3               | 11       | 0.36 | 1.85           | 434.5          | 0.6               | 20       | 0.55 | 0.41           |
| 457.7     | 1.9               | 14       | 0.35 | 3.69           | 448.4          | 0.6               | 16       | 0.63 | 0.21           |
| 480.8     | 1.4               | 7        | 0.44 | 2.40           | 499.2          | 0.5               | 5        | 0.57 | 0.22           |
| 474.7     | 1.1               | 10       | 0.57 | 3.61           | 459.0          | 0.5               | 14       | 0.64 | 0.45           |
| 411.3     | 0.7               | 24       | 0.44 | 0.75           | 467.4          | 0.4               | 12       | 0.62 | 0.46           |
| 453.1     | 0.6               | 15       | 0.61 | 3.12           | 478.2          | 0.4               | 8        | 0.57 | 0.63           |
| 478.8     | 0.5               | 8        | 0.43 | 2.88           | 504.8          | 0.4               | 2        | 0.19 | 0.17           |
| 500.5     | 0.5               | 4        | 0.15 | 0.84           | 425.9          | 0.4               | 23       | 0.57 | 0.60           |

**Table S9.** Summary of the 12 most intense transitions in **sbpc** complexes.  $N_{tr}$  is the number of the transition, the transition from the ground state to the  $N^{th}$  excited state. The values are ordered by decreasing value of the oscillator strength.  $q$  and  $R$  are the amount of charge transferred and the transfer distance as commented in the text.

| $C_{60}$  |                   |          |      |                | $Sc_3N@C_{68}$ |                   |          |      |                |
|-----------|-------------------|----------|------|----------------|----------------|-------------------|----------|------|----------------|
| $\nu$ /nm | $f_{osc}/10^{-2}$ | $N_{tr}$ | $q$  | $R/\text{\AA}$ | $\nu$ /nm      | $f_{osc}/10^{-2}$ | $N_{tr}$ | $q$  | $R/\text{\AA}$ |
| 466.3     | 29.6              | 15       | 0.39 | 1.03           | 467.7          | 20.5              | 8        | 0.45 | 0.70           |
| 466.9     | 28.4              | 14       | 0.37 | 1.13           | 467.7          | 19.0              | 7        | 0.47 | 0.70           |
| 520.6     | 0.5               | 2        | 0.95 | 5.03           | 428.5          | 16.3              | 14       | 0.41 | 1.08           |
| 423.9     | 0.4               | 20       | 0.40 | 0.34           | 428.5          | 16.1              | 15       | 0.41 | 1.05           |
| 426.5     | 0.3               | 18       | 0.35 | 0.53           | 467.6          | 4.5               | 9        | 0.77 | 4.95           |
| 425.9     | 0.2               | 19       | 0.34 | 0.36           | 421.6          | 1.5               | 17       | 0.54 | 0.49           |
| 482.4     | 0.1               | 10       | 0.38 | 0.45           | 421.8          | 1.5               | 16       | 0.52 | 0.45           |
| 500.9     | 0.1               | 3        | 0.86 | 5.45           | 399.2          | 1.5               | 21       | 0.38 | 0.36           |
| 481.7     | 0.0               | 11       | 0.43 | 1.59           | 478.8          | 1.4               | 6        | 0.51 | 0.34           |
| 429.5     | 0.0               | 16       | 0.34 | 0.44           | 451.0          | 1.2               | 10       | 0.86 | 5.41           |
| 493.3     | 0.0               | 5        | 0.28 | 0.32           | 450.6          | 1.2               | 11       | 0.86 | 5.39           |
| 352.7     | 0.0               | 23       | 0.23 | 0.17           | 479.5          | 1.0               | 5        | 0.52 | 0.32           |
| $C_{70}$  |                   |          |      |                | $Sc_3N@C_{80}$ |                   |          |      |                |
| $\nu$ /nm | $f_{osc}/10^{-2}$ | $N_{tr}$ | $q$  | $R/\text{\AA}$ | $\nu$ /nm      | $f_{osc}/10^{-2}$ | $N_{tr}$ | $q$  | $R/\text{\AA}$ |
| 472.7     | 23.7              | 7        | 0.41 | 0.88           | 467.9          | 15.4              | 11       | 0.49 | 0.77           |
| 455.2     | 14.4              | 13       | 0.45 | 1.31           | 466.3          | 15.4              | 12       | 0.49 | 0.71           |
| 464.5     | 7.4               | 10       | 0.45 | 3.27           | 470.2          | 8.7               | 9        | 0.53 | 0.34           |
| 456.1     | 7.4               | 12       | 0.31 | 1.98           | 469.1          | 8.3               | 10       | 0.51 | 0.46           |
| 459.5     | 5.0               | 11       | 0.37 | 1.68           | 450.2          | 2.6               | 16       | 0.64 | 0.42           |
| 468.0     | 2.5               | 9        | 0.50 | 1.18           | 423.5          | 2.0               | 24       | 0.56 | 0.42           |
| 511.8     | 2.4               | 3        | 0.86 | 5.55           | 435.2          | 1.8               | 20       | 0.56 | 0.52           |
| 421.2     | 2.0               | 18       | 0.73 | 4.62           | 435.9          | 1.6               | 19       | 0.55 | 0.48           |
| 471.8     | 1.7               | 8        | 0.52 | 2.20           | 433.8          | 1.3               | 21       | 0.58 | 0.25           |
| 450.9     | 1.3               | 14       | 0.56 | 5.96           | 463.3          | 1.2               | 13       | 0.61 | 0.26           |
| 476.1     | 0.9               | 6        | 0.51 | 1.46           | 474.0          | 1.1               | 8        | 0.62 | 0.33           |
| 571.3     | 0.7               | 1        | 0.94 | 4.27           | 499.7          | 0.5               | 3        | 0.58 | 0.29           |

**Table S10.** Summary of the 12 most intense transitions in **cora5CN** complexes.  $N_{tr}$  is the number of the transition, the transition from the ground state to the  $N^{th}$  excited state. The values are ordered by decreasing value of the oscillator strength.  $q$  and  $R$  are the amount of charge transferred and the transfer distance as commented in the text.

| $C_{60}$  |                   |          |      |                | $Sc_3N@C_{68}$ |                   |          |      |                |
|-----------|-------------------|----------|------|----------------|----------------|-------------------|----------|------|----------------|
| $\nu$ /nm | $f_{osc}/10^{-2}$ | $N_{tr}$ | $q$  | $R/\text{\AA}$ | $\nu$ /nm      | $f_{osc}/10^{-2}$ | $N_{tr}$ | $q$  | $R/\text{\AA}$ |
| 374.9     | 1.7               | 23       | 0.97 | 5.22           | 428.8          | 8.9               | 15       | 0.42 | 1.14           |
| 378.5     | 0.2               | 21       | 0.95 | 5.22           | 427.0          | 8.4               | 16       | 0.44 | 1.46           |
| 378.3     | 0.2               | 22       | 0.95 | 5.21           | 474.0          | 5.6               | 8        | 0.56 | 1.05           |
| 379.0     | 0.1               | 20       | 0.96 | 5.17           | 464.0          | 2.2               | 11       | 0.76 | 5.20           |
| 429.4     | 0.1               | 12       | 0.37 | 0.60           | 467.8          | 2.2               | 10       | 0.67 | 3.75           |
| 429.6     | 0.1               | 11       | 0.37 | 0.61           | 395.6          | 1.5               | 22       | 0.40 | 0.73           |
| 428.0     | 0.0               | 13       | 0.30 | 0.80           | 522.7          | 1.1               | 5        | 0.45 | 1.24           |
| 379.0     | 0.0               | 19       | 0.96 | 5.18           | 470.2          | 1.0               | 9        | 0.73 | 4.72           |
| 382.2     | 0.0               | 16       | 0.94 | 5.14           | 530.7          | 0.7               | 4        | 0.40 | 0.43           |
| 381.9     | 0.0               | 17       | 0.93 | 5.16           | 569.2          | 0.7               | 3        | 0.96 | 5.52           |
| 381.8     | 0.0               | 18       | 0.91 | 5.15           | 410.0          | 0.4               | 21       | 0.45 | 0.85           |
| 356.4     | 0.0               | 24       | 1.00 | 6.00           | 411.1          | 0.4               | 20       | 0.50 | 0.72           |
| $C_{70}$  |                   |          |      |                | $Sc_3N@C_{80}$ |                   |          |      |                |
| $\nu$ /nm | $f_{osc}/10^{-2}$ | $N_{tr}$ | $q$  | $R/\text{\AA}$ | $\nu$ /nm      | $f_{osc}/10^{-2}$ | $N_{tr}$ | $q$  | $R/\text{\AA}$ |
| 463.3     | 5.0               | 7        | 0.31 | 1.26           | 452.1          | 3.6               | 16       | 0.73 | 2.23           |
| 459.3     | 3.8               | 8        | 0.43 | 1.45           | 508.6          | 1.2               | 1        | 0.63 | 0.71           |
| 478.0     | 2.1               | 3        | 0.55 | 2.39           | 454.4          | 1.1               | 15       | 0.79 | 3.16           |
| 470.0     | 2.1               | 5        | 0.50 | 2.56           | 432.6          | 1.0               | 23       | 0.57 | 0.66           |
| 467.5     | 2.0               | 6        | 0.47 | 2.51           | 431.7          | 0.9               | 24       | 0.55 | 0.89           |
| 478.7     | 1.1               | 2        | 0.61 | 2.73           | 464.9          | 0.7               | 12       | 0.79 | 4.35           |
| 429.7     | 0.1               | 11       | 0.62 | 4.13           | 474.6          | 0.5               | 7        | 0.63 | 1.04           |
| 475.6     | 0.1               | 4        | 0.44 | 2.74           | 477.8          | 0.4               | 6        | 0.65 | 1.38           |
| 400.1     | 0.1               | 22       | 0.41 | 0.27           | 483.2          | 0.4               | 4        | 0.70 | 3.82           |
| 454.8     | 0.0               | 9        | 0.59 | 3.15           | 494.9          | 0.3               | 3        | 0.58 | 0.25           |
| 389.2     | 0.0               | 24       | 0.51 | 4.91           | 498.0          | 0.2               | 2        | 0.56 | 0.62           |
| 397.1     | 0.0               | 23       | 0.31 | 1.61           | 440.6          | 0.2               | 22       | 0.64 | 2.00           |

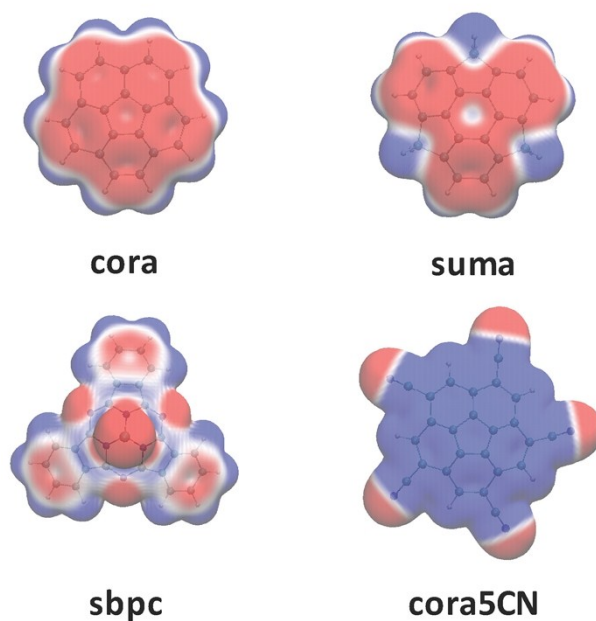

**Figure S1.** Molecular Electrostatic Potentials (MEP) of the bowls employed in this work at the B3LYP-D/def2-TZVP level by the convex face. MEP mapped onto a isodensity surface of 0.002 a.u. Colour scale runs from -0.010 a.u. (red) to 0.010 a.u (blue). White is 0.0.

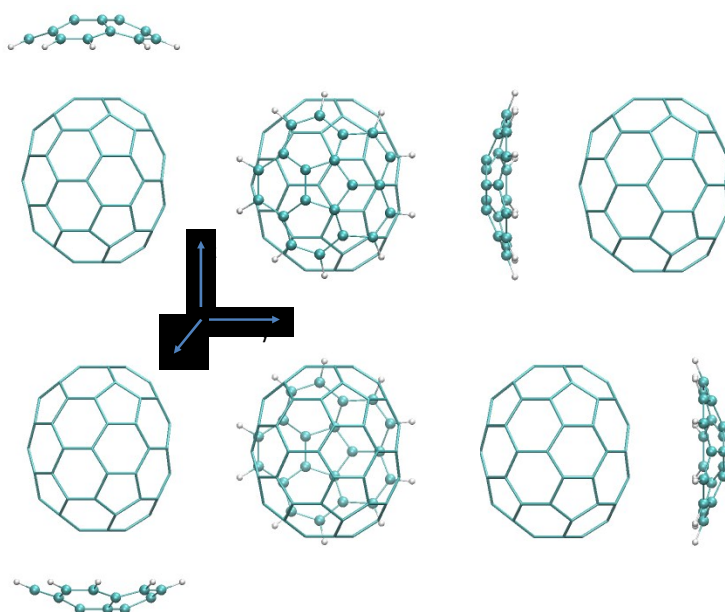

**Figure S2.** Representation of the starting structures employed for searching the minimum energy structures of the dimers. The corannulene-C70 case is shown.



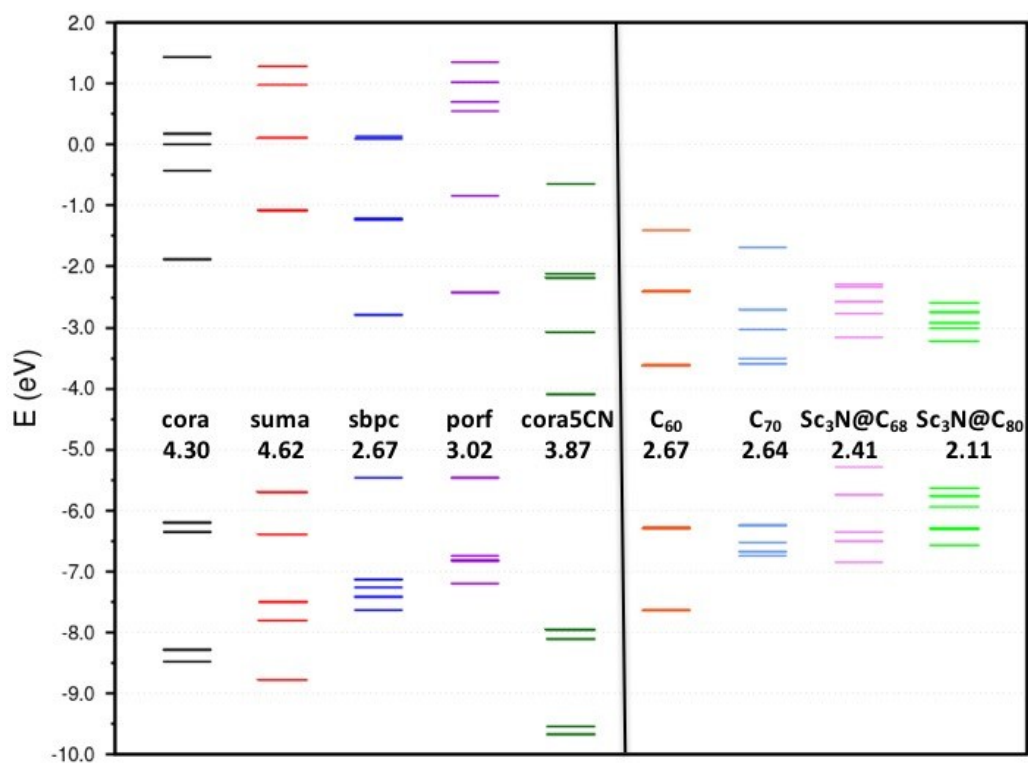

**Figure S3.** Frontier orbital energies of the molecules studied at the B3LYP/def2-TZVP//B97-D2/def2-TZVP level. Numbers correspond to the HOMO-LUMO gap.

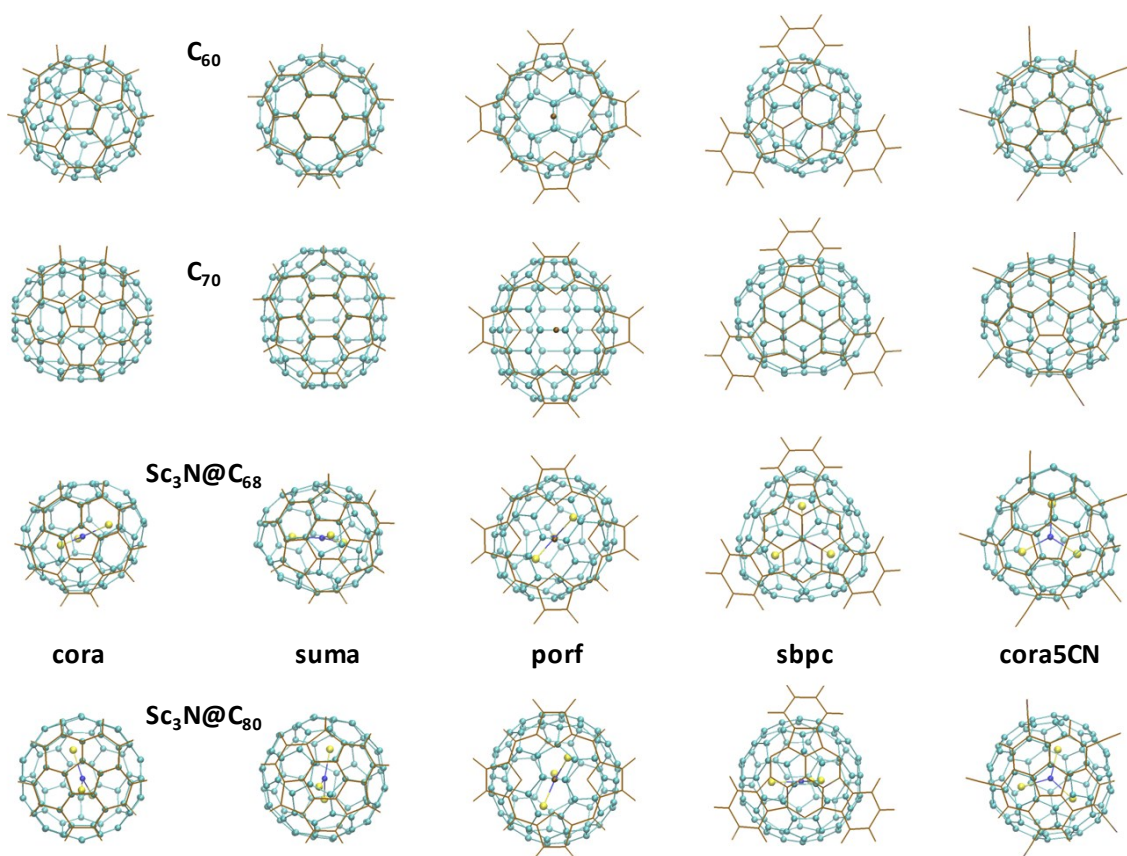

**Figure S4.** Another view of the most stable structures found for the complexes studied at the B3LYP-D/def2-TZVP//B97-D2/def2-TZVP shown in Figure 5. The bowl is shown in ochre, with the complex observed from the bottom of the bowl.

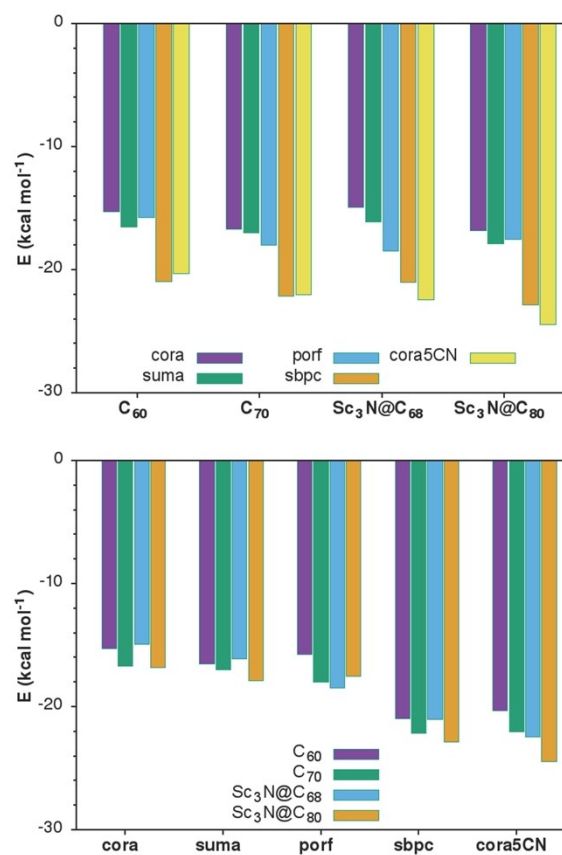

**Figure S5.** Complexation energies of the complexes studied. B3LYP-D/def2-TZVP+3-body results.

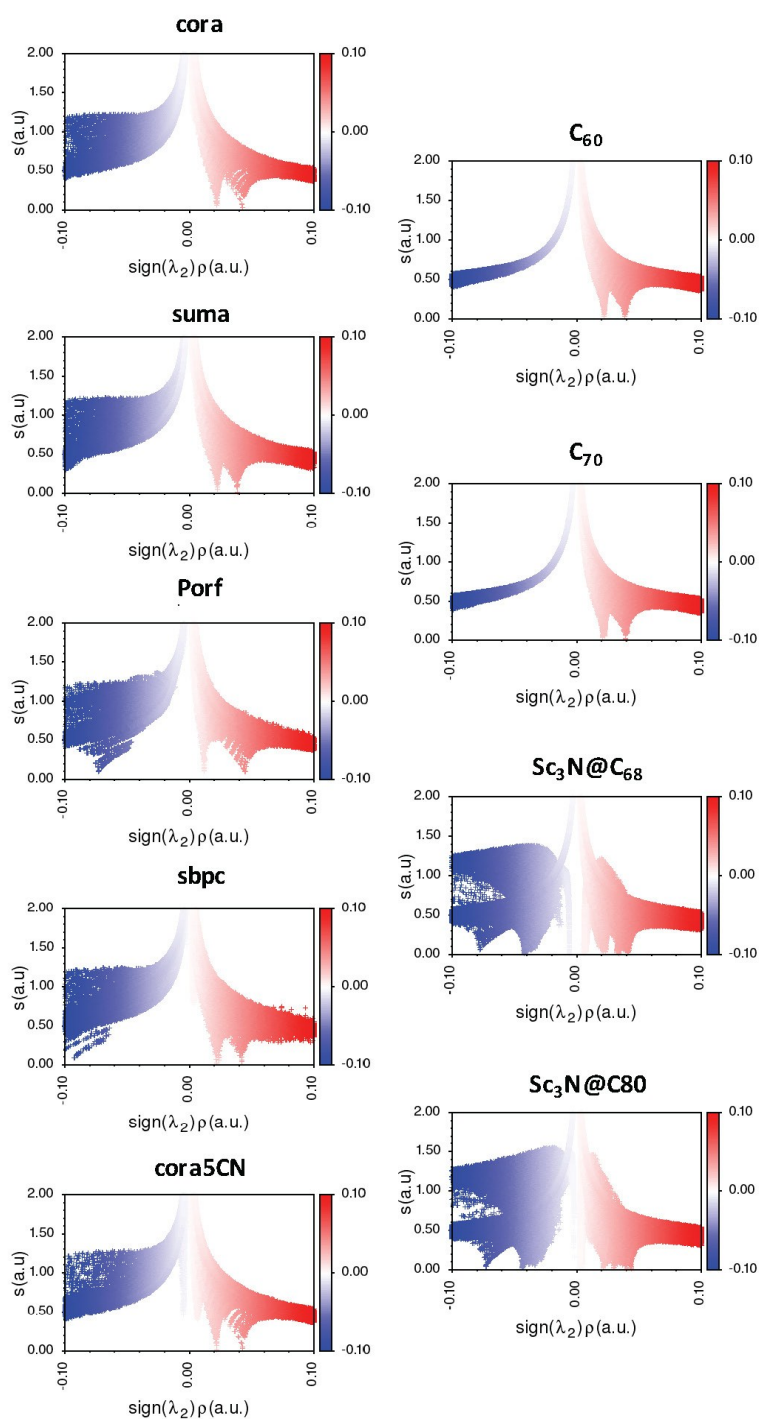

**Figure S6.** Non covalent interaction index for the isolated molecules. The product of the density times the sign of the second eigenvalue of its Hessian is mapped onto an isosurface of reduced density gradient with value 0.5 a.u.; the color scale goes from  $-0.1$  au (blue) to  $+0.1$  au (red).

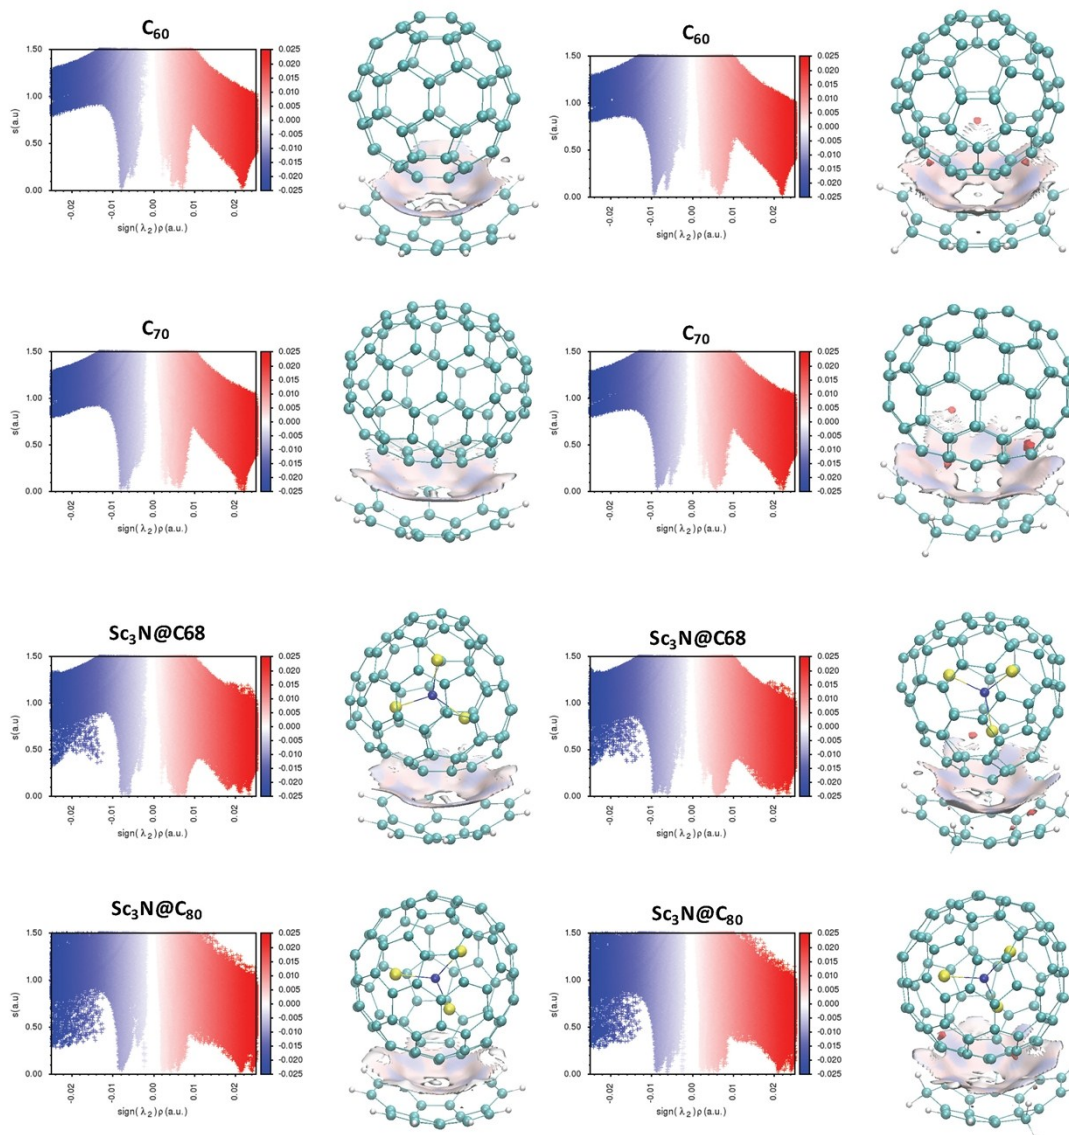

**Figure S7.** NCI plots for the most stable minima found for the dimers formed with cora (left) and suma (right) at the B3LYP-D/def2-TZVP level. Values corresponding to a isosurface of reduced density gradient of 0.5 a.u.; colour scale runs from -0.025 to 0.025.

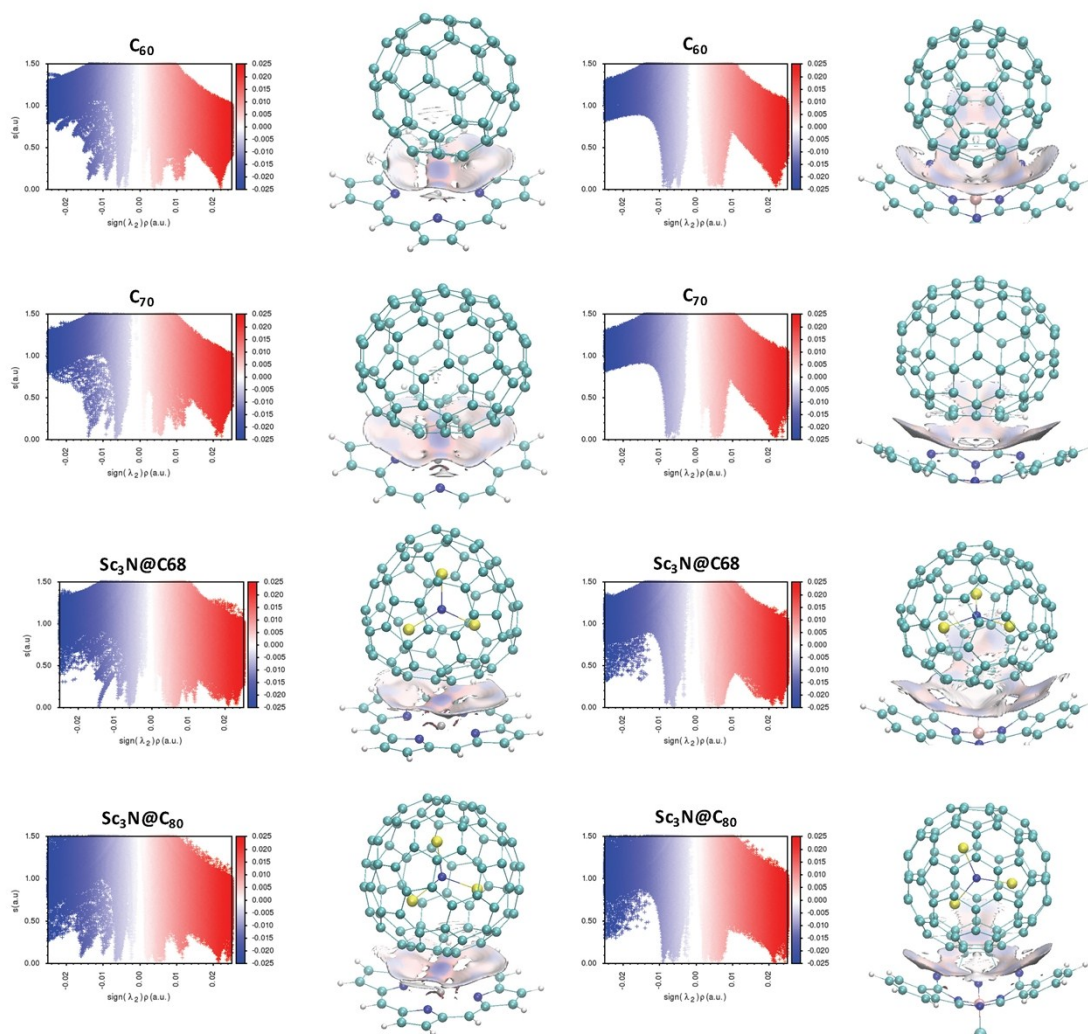

**Figure S8.** NCI plots for the most stable minima found for the dimers formed with porf (left) and sbpc (right) at the B3LYP-D/def2-TZVP level. Values corresponding to a isosurface of reduced density gradient of 0.5 a.u.; colour scale runs from -0.025 to 0.025.

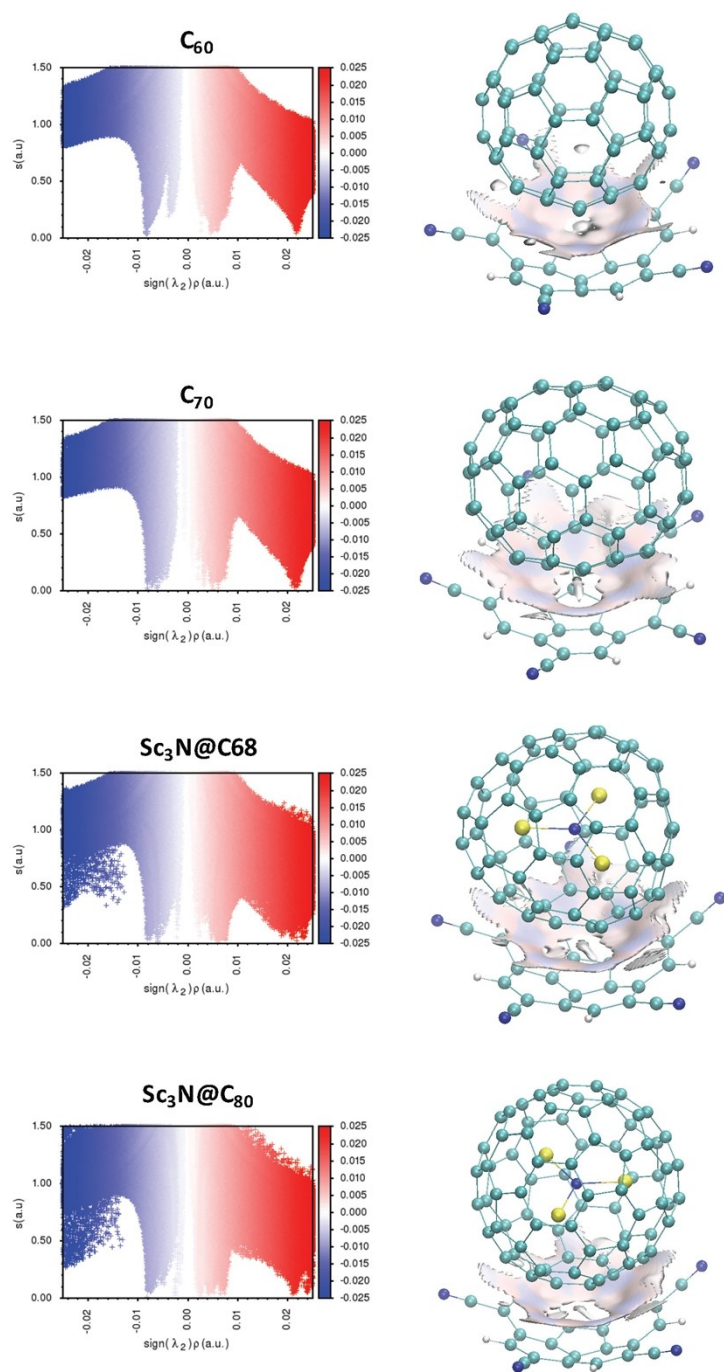

**Figure S9.** NCI plots for the most stable minima found for the dimers formed with cora5CN at the B3LYP-D/def2-TZVP level. Values corresponding to a isosurface of reduced density gradient of 0.5 a.u.; colour scale runs from -0.025 to 0.025.

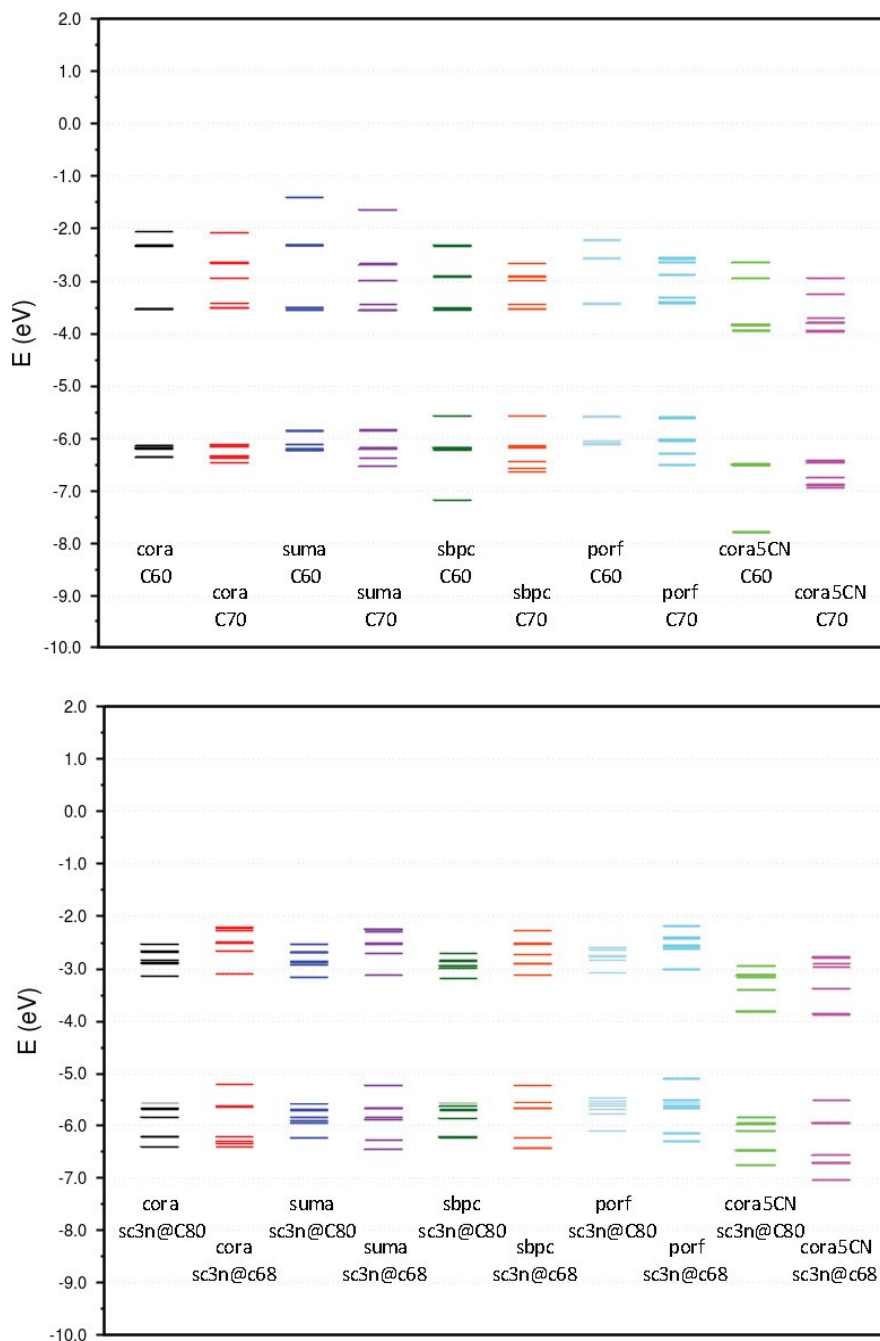

**Figure S10.** Schematic representation of the energy levels of highest occupied and lowest unoccupied molecular orbitals in the dimers studied. B3LYP-D/def2-TZVP//B97-D2/def2-TZVP.



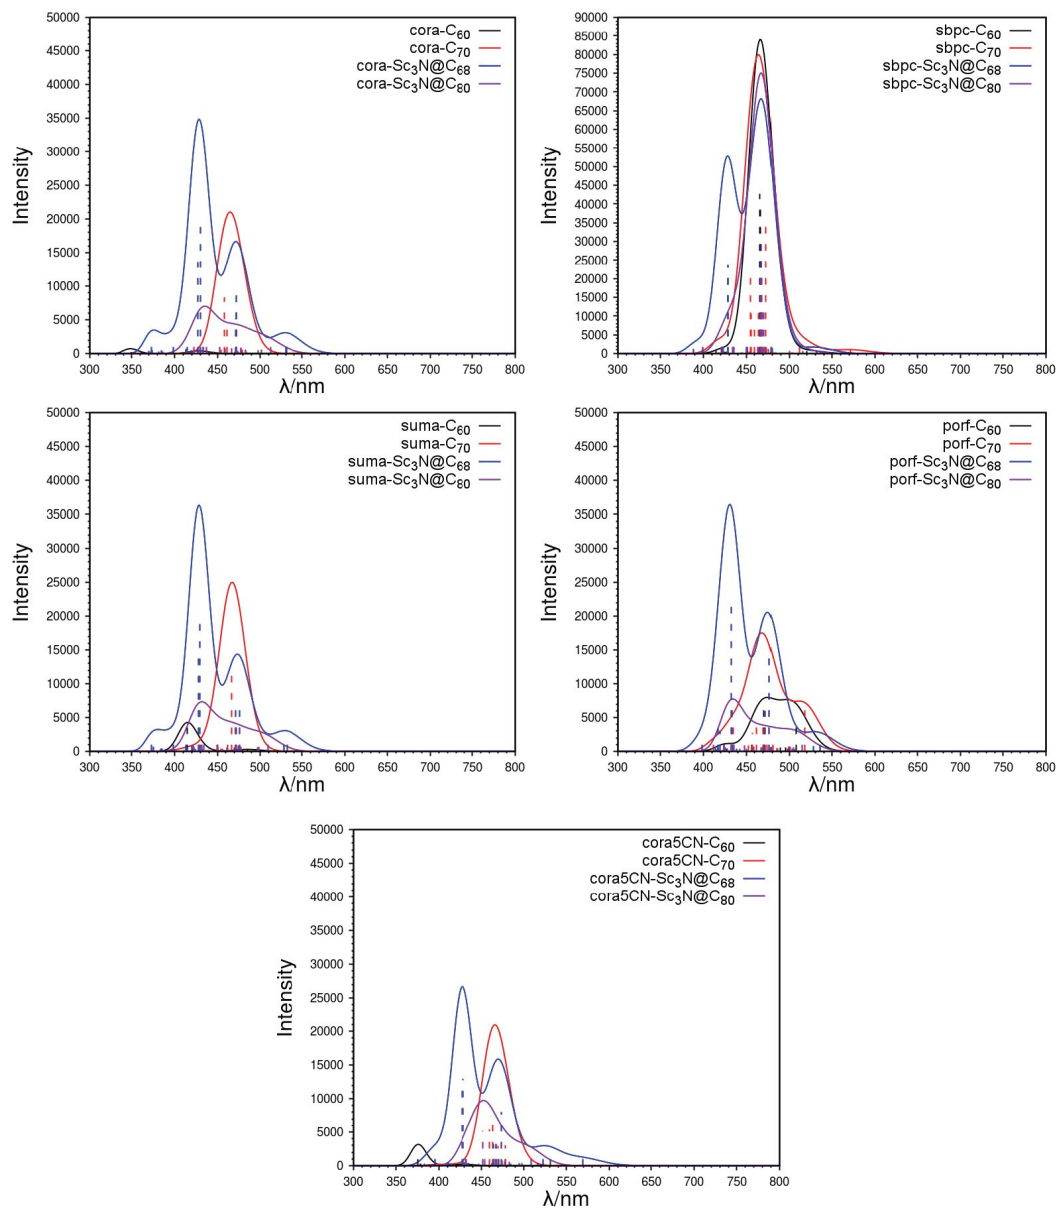

**Figure S11.** Predicted absorption spectra of the dimers studied as obtained at the CAM-B3LYP/TZVP level.

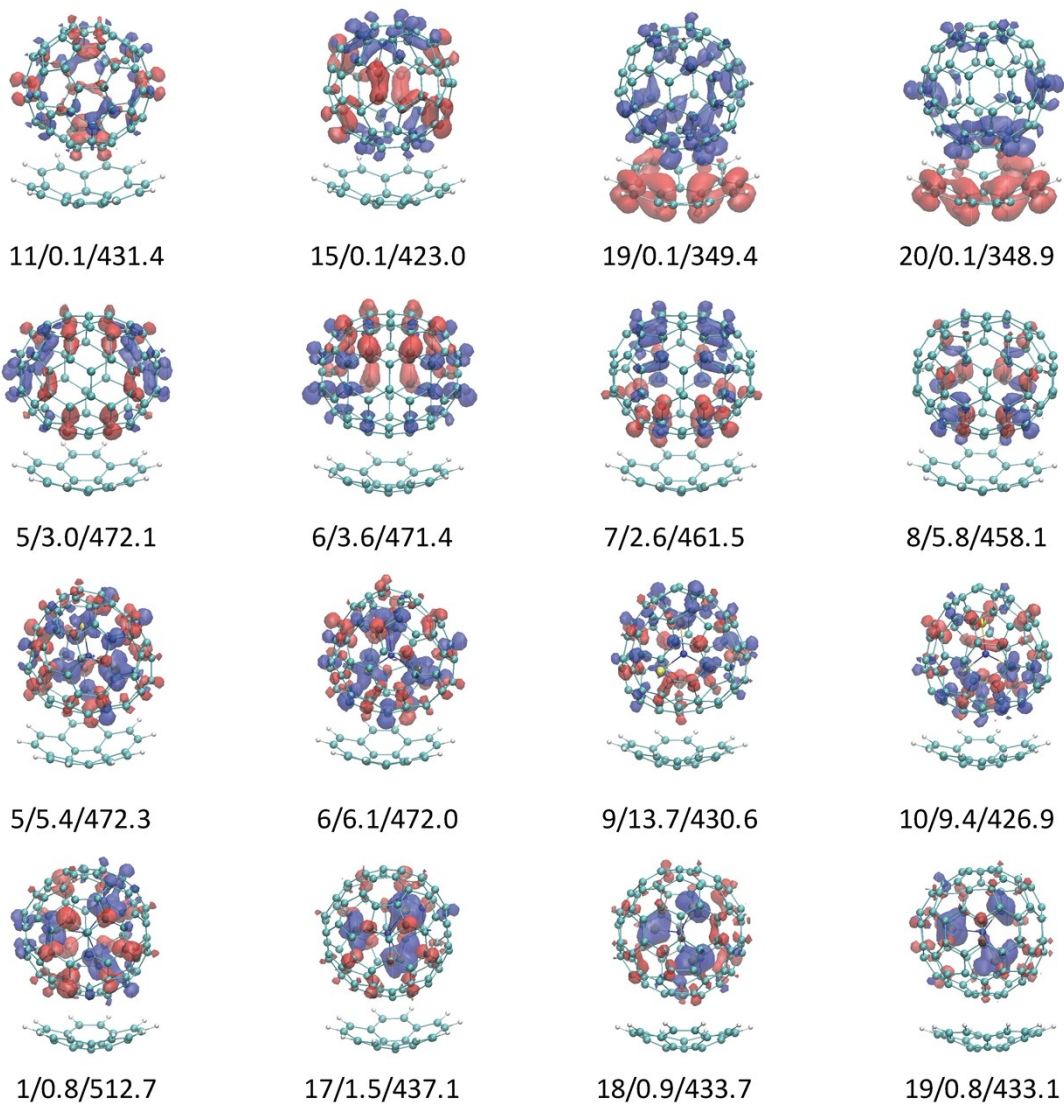

**Figure S12.** Density difference upon transition for the four most intense transitions in cora complexes. The numbers are the number of the transition/ oscillator strength \* 100/ wavenumber (nm). Surfaces correspond to +0.001 a.u. (blue) and -0.001 a.u. (red).

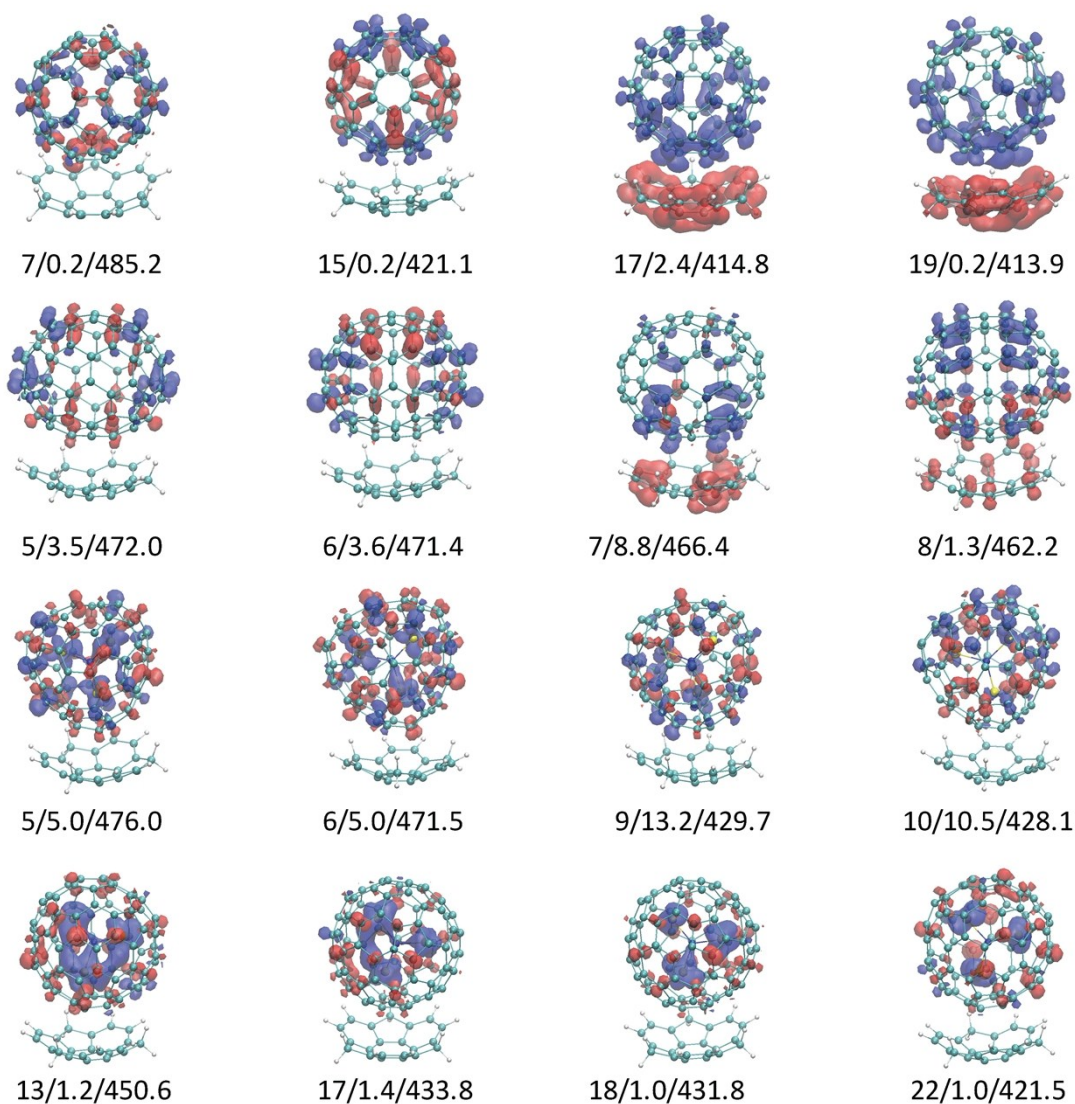

**Figure S13.** Density difference upon transition for the four most intense transitions in suma complexes. The numbers are the number of the transition/ oscillator strength \* 100/ wavenumber (nm). Surfaces correspond to +0.001 a.u. (blue) and -0.001 a.u. (red).

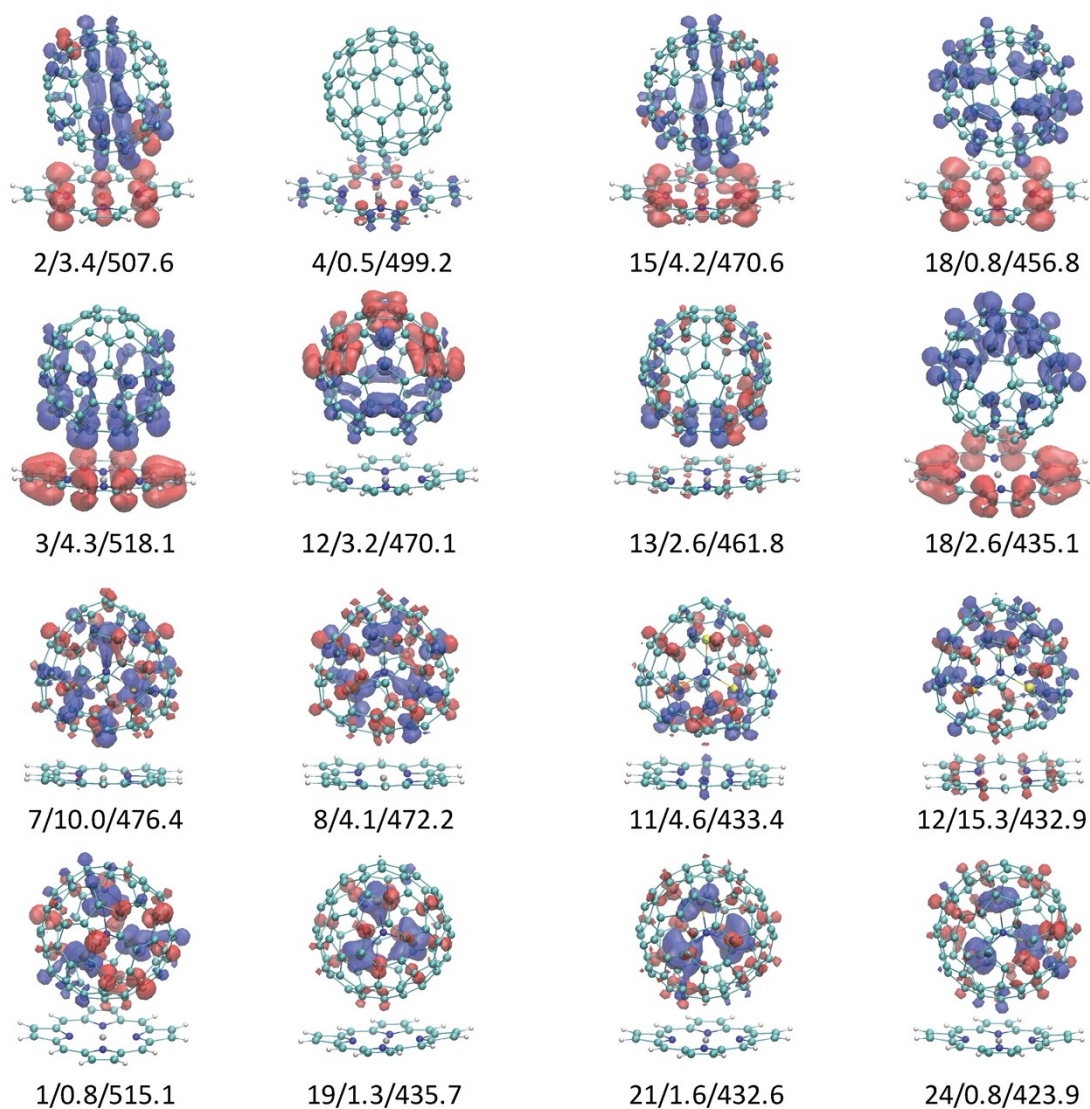

**Figure S14.** Density difference upon transition for the four most intense transitions in porf complexes. The numbers are the number of the transition/ oscillator strength \* 100/ wavenumber (nm). Surfaces correspond to +0.001 a.u. (blue) and -0.001 a.u. (red).

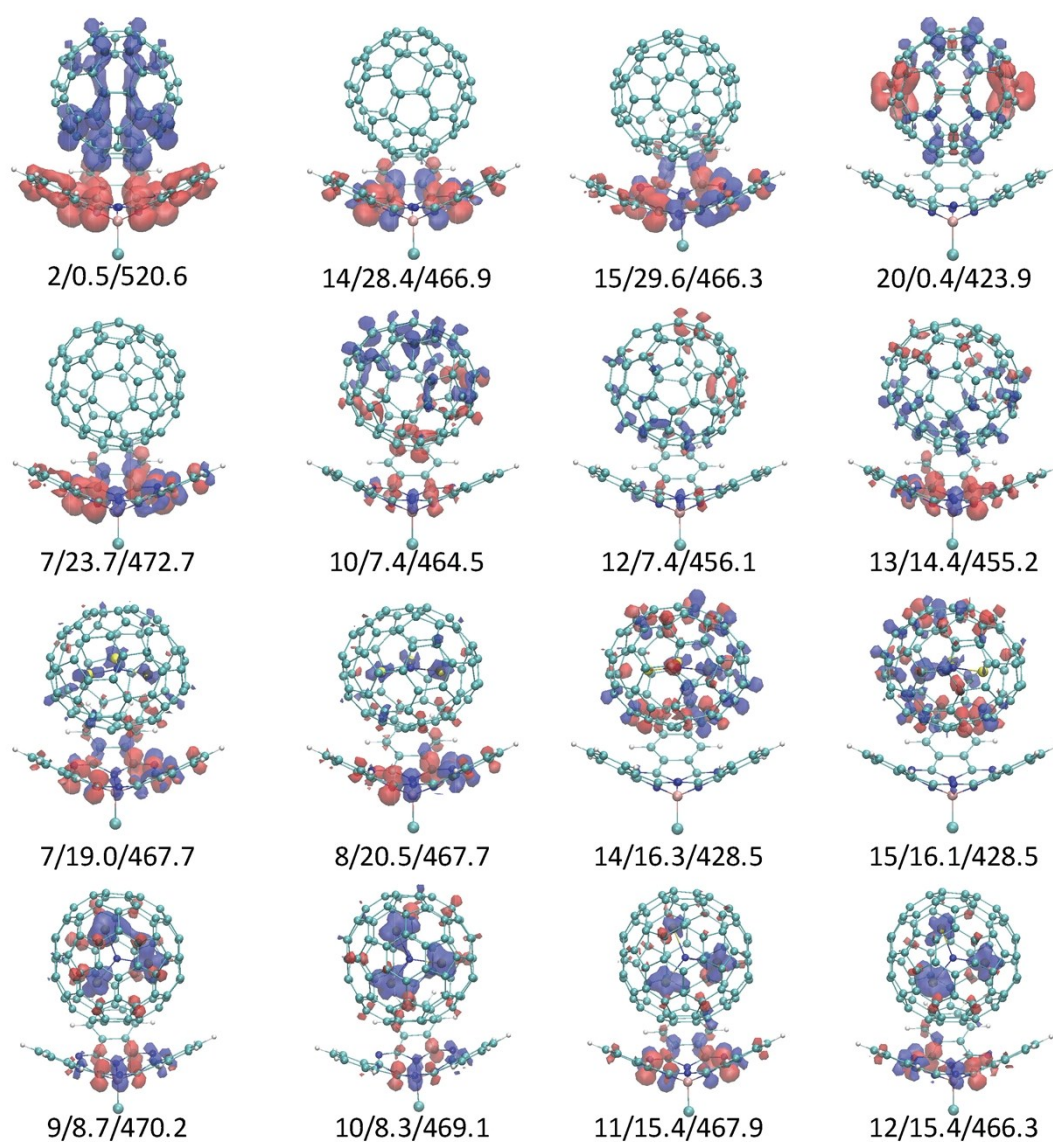

**Figure S15.** Density difference upon transition for the four most intense transitions in sbpc complexes. The numbers are the number of the transition/ oscillator strength \* 100/ wavenumber (nm). Surfaces correspond to +0.001 a.u. (blue) and -0.001 a.u. (red).

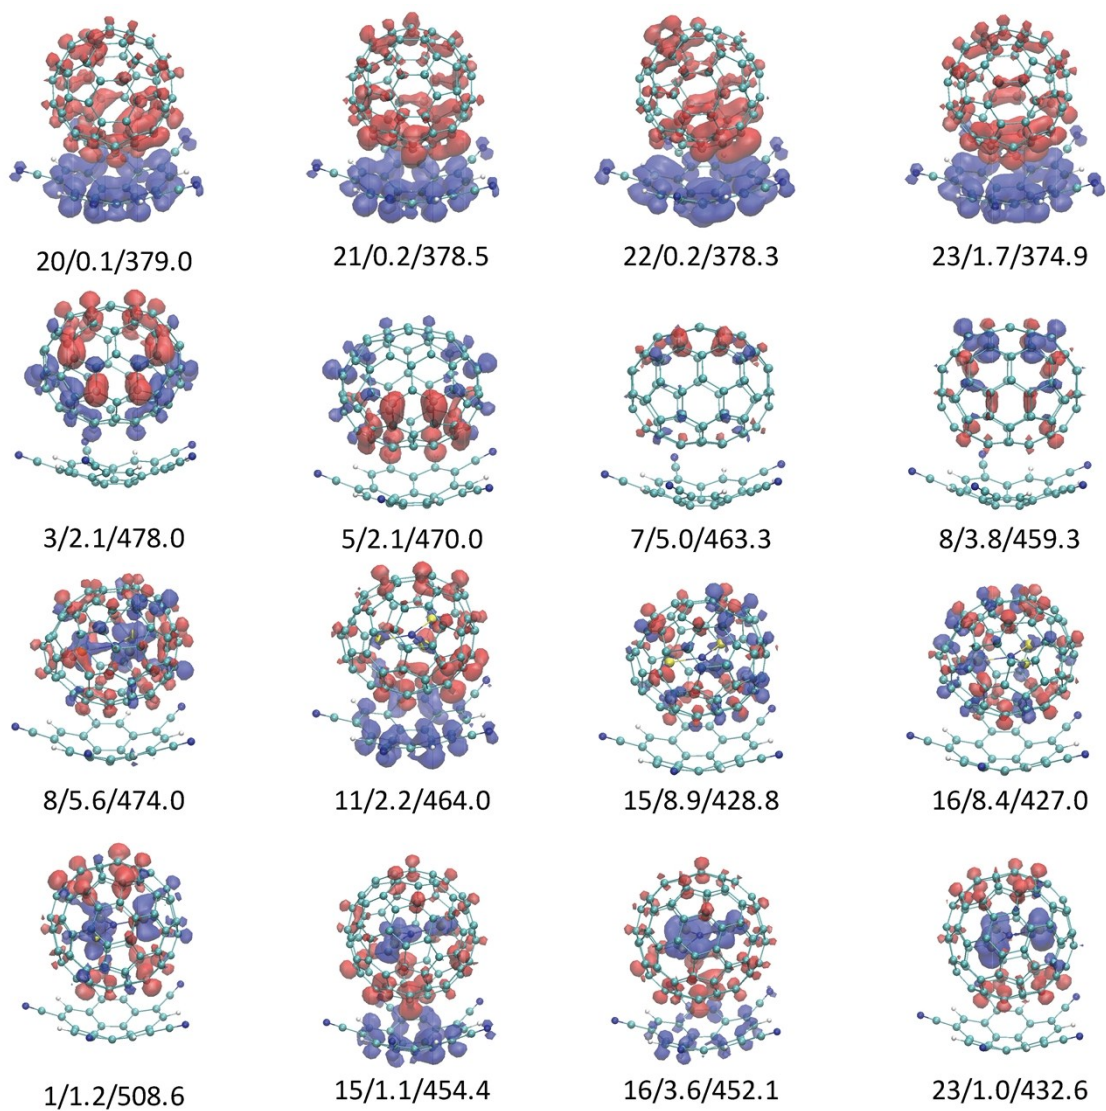

**Figure S16.** Density difference upon transition for the four most intense transitions in cora5CN complexes. The numbers are the number of the transition/ oscillator strength \* 100/ wavenumber (nm). Surfaces correspond to +0.001 a.u. (blue) and -0.001 a.u. (red).

Cartesian coordinates in Å of the molecules studied and their most stable dimers at the B97-D2/def2-TZVP level.

```
-----cora-----
30
C -0.975354 0.708579 0.830891
C -0.975354 -0.708579 0.830891
C 0.372686 -1.146675 0.830803
C 1.205856 0.000000 0.830732
C 0.372686 1.146675 0.830803
C -2.009581 1.460003 0.284351
C -2.009581 -1.460003 0.284351
C 0.767565 -2.362410 0.284201
C 2.483972 -0.000000 0.283891
C 0.767565 2.362410 0.284201
C 2.164328 2.432962 -0.086266
C 2.982527 1.306699 -0.086507
C 2.982527 -1.306699 -0.086507
C 2.164328 -2.432962 -0.086266
C -1.644991 -2.810107 -0.086026
C -0.321092 -3.240343 -0.086056
C -3.180873 -0.696021 -0.086492
C -3.180874 0.696021 -0.086492
C -1.644991 2.810108 -0.086026
C -0.321092 3.240343 -0.086056
H 2.568532 3.368418 -0.470944
H 3.996877 1.402202 -0.471676
H 3.996877 -1.402202 -0.471676
H 2.568532 -3.368418 -0.470944
H -2.409634 -3.483622 -0.470975
H -0.098443 -4.234812 -0.470585
H -4.057459 -1.215067 -0.472037
H -4.057459 1.215067 -0.472037
H -2.409634 3.483622 -0.470975
H -0.098443 4.234812 -0.470585
```

```
-----suma-----
33
C -3.305259 0.716304 -0.250402
C -3.305259 -0.716304 -0.250402
C 3.295909 -0.000000 0.018488
C 2.361699 -1.211557 0.280929
C 1.216661 -0.716177 0.918337
C 1.216661 0.716177 0.918337
C 2.361699 1.211557 0.280929
C 1.032128 -3.220549 -0.251246
C 2.272930 -2.504186 -0.250761
C -2.229953 -1.439096 0.281146
C -1.228068 -0.695551 0.918626
C 0.012140 -1.411914 0.918299
C -0.131637 -2.651061 0.280539
```

```

C -1.648063 -2.853814 0.017931
C -1.648063 2.853814 0.017930
C -0.131637 2.651061 0.280539
C 0.012140 1.411914 0.918299
C -1.228068 0.695551 0.918626
C -2.229953 1.439096 0.281146
C 2.272930 2.504186 -0.250761
C 1.032128 3.220549 -0.251246
H -4.101238 1.220969 -0.796456
H -4.101238 -1.220969 -0.796456
H 3.679171 -0.000000 -1.009680
H 0.993293 -4.162096 -0.797534
H 3.107918 -2.941627 -0.796582
H -1.839731 -3.185161 -1.010415
H -1.839731 3.185161 -1.010415
H -2.084941 3.610394 0.688414
H 3.107918 2.941626 -0.796582
H 0.993293 4.162096 -0.797534
H -2.084941 -3.610394 0.688414
H 4.169168 -0.000000 0.689536
```

```
-----porf-----
37
C 4.258041 0.683636 -0.000000
C 4.258041 -0.683637 -0.000000
C 2.874519 -1.104163 0.000000
C 2.874519 1.104163 0.000000
C -0.683636 4.258041 -0.000000
C 0.683637 4.258041 -0.000000
C 1.104163 2.874519 0.000000
C -1.104163 2.874519 0.000000
C 2.430311 2.430311 0.000000
C -4.258041 -0.683637 -0.000000
C -4.258041 0.683636 -0.000000
C -2.874519 1.104163 0.000000
C -2.874519 -1.104163 0.000000
C -2.430311 2.430311 0.000000
C 0.683636 -4.258041 -0.000000
C -0.683636 -4.258041 -0.000000
C -1.104163 -2.874519 0.000000
C 1.104163 -2.874519 0.000000
C 2.430311 -2.430311 0.000000
C -2.430311 -2.430311 0.000000
H 5.110291 1.354123 -0.000000
H 5.110291 -1.354123 -0.000000
H -1.354123 5.110291 -0.000000
H 1.354123 5.110291 -0.000000
H 3.199525 3.199524 0.000000
H -5.110291 -1.354123 -0.000000
H -5.110291 1.354123 -0.000000
H -3.199524 3.199524 0.000000
H 1.354123 -5.110291 -0.000000
H -1.354123 -5.110291 -0.000000
H 3.199524 -3.199524 0.000000
H -3.199524 -3.199524 -0.000000
N 2.058691 -0.000000 0.000000
N 0.000000 2.058691 0.000000
```

N -2.058691 -0.000000 0.000000  
N -0.000000 -2.058691 0.000000  
Zn 0.000000 0.000000 0.000000

-----sbpc-----

44

C -3.266029 -0.717143 0.223390  
C -3.266029 0.717143 0.223390  
C -4.333305 1.427770 -0.333126  
C -5.404814 0.705032 -0.858368  
C -5.404814 -0.705033 -0.858368  
C -4.333304 -1.427770 -0.333126  
C -1.986923 -1.147014 0.767098  
C -1.986923 1.147014 0.767097  
H -4.321193 2.514511 -0.349660  
H -6.254495 1.236107 -1.281424  
H -6.254495 -1.236108 -1.281423  
H -4.321193 -2.514511 -0.349660  
C 2.253956 -2.471144 0.221069  
C 1.011939 -3.188622 0.223549  
C 0.929953 -4.469834 -0.329259  
C 2.091437 -5.037655 -0.853647  
C 3.312359 -4.332248 -0.856251  
C 3.402720 -3.041438 -0.334608  
C 1.986871 -1.147658 0.763376  
C 0.000388 -2.295030 0.766786  
H -0.017127 -5.002976 -0.342927  
H 2.056329 -6.040419 -1.273420  
H 4.197180 -4.803540 -1.278088  
H 4.337961 -2.487910 -0.352773  
C 1.011940 3.188623 0.223549  
C 2.253956 2.471144 0.221069  
C 3.402720 3.041438 -0.334608  
C 3.312359 4.332247 -0.856252  
C 2.091437 5.037655 -0.853647  
C 0.929953 4.469835 -0.329259  
C 0.000388 2.295031 0.766787  
C 1.986871 1.147658 0.763376  
H 4.337961 2.487910 -0.352774  
H 4.197180 4.803539 -1.278089  
H 2.056330 6.040418 -1.273420  
H -0.017126 5.002977 -0.342927  
N 0.685806 1.187177 1.197261  
N -1.370181 0.000000 1.199290  
N 0.685806 -1.187177 1.197260  
N -1.334680 2.311913 0.628543  
N -1.334680 -2.311913 0.628543  
N 2.668826 0.000000 0.623257  
B 0.001296 0.000000 1.801844  
Cl 0.003391 -0.000001 3.680575

-----cora5CN-----

35

C -0.080266 -1.201368 0.950301  
C 1.117836 -0.447794 0.950153  
C 0.771330 0.924573 0.950740  
C -0.641037 1.019256 0.951138

C -1.167233 -0.294794 0.950887  
C -0.158607 -2.478819 0.418584  
C 2.308535 -0.916879 0.418086  
C 1.585276 1.912235 0.419009  
C -1.328686 2.098791 0.419464  
C -2.406101 -0.615024 0.418617  
C -3.223835 0.540941 0.062699  
C -2.698128 1.842012 0.060788  
C -0.482014 3.233793 0.063642  
C 0.917849 3.135328 0.060887  
C 3.265366 0.095960 0.059762  
C 2.926183 1.457659 0.062698  
C 2.290421 -2.332785 0.062300  
C 1.100126 -3.076117 0.060074  
C -1.510804 -2.899300 0.062961  
C -2.585342 -1.996778 0.060212  
H -3.322258 2.652371 -0.308393  
H 1.495769 3.979119 -0.308650  
H 4.246544 -0.192662 -0.309807  
H 1.128275 -4.098567 -0.309288  
H -3.548976 -2.339548 -0.309253  
C -1.101999 4.432727 -0.404245  
N -1.645825 5.389528 -0.779852  
C -4.555570 0.321390 -0.405350  
N -5.633441 0.099092 -0.780946  
C -1.714091 -4.234198 -0.403333  
N -1.836448 -5.328503 -0.777271  
C 3.496899 -2.938652 -0.404680  
N 4.499399 -3.393724 -0.779134  
C 3.874770 2.418351 -0.404249  
N 4.616084 3.232389 -0.778558

-----c60-----

60

C -0.998749 0.725818 -3.328693  
C -0.998749 -0.725818 -3.328693  
C -1.960649 -1.424615 -2.592169  
C -2.960192 -0.699083 -1.829480  
C -2.960192 0.699083 -1.829480  
C -1.960649 1.424615 -2.592169  
C 0.381993 1.174548 -3.328877  
C 1.235589 0.000000 -3.329682  
C 0.381993 -1.174548 -3.328878  
C 0.749345 -2.305663 -2.592971  
C -1.579139 -2.598731 -1.828863  
C -3.196340 -1.424946 -0.594475  
C -3.423301 -0.725888 0.595039  
C -3.423301 0.725888 0.595039  
C -3.196341 1.424946 -0.594475  
C -2.343334 2.599712 -0.594605  
C -1.579139 2.598732 -1.828863  
C -0.249582 3.031413 -1.829400  
C 0.749345 2.305663 -2.592971  
C 2.424524 0.000000 -2.593267  
C 2.805724 1.174571 -1.829762  
C 1.983894 2.305910 -1.829669  
C 1.748789 3.032369 -0.594968



C 0.367689 3.480152 -0.594567  
 C -0.367690 3.480152 0.594567  
 C -1.748788 3.032369 0.594968  
 C -1.983894 2.305910 1.829669  
 C -2.805725 1.174572 1.829762  
 C -2.343334 -2.599711 -0.594605  
 C -0.381993 -1.174549 3.328877  
 C -0.749344 -2.305663 2.592970  
 C 0.249582 -3.031413 1.829400  
 C 1.579138 -2.598732 1.828863  
 C 1.960649 -1.424615 2.592169  
 C 0.998749 0.725818 3.328693  
 C -0.381994 1.174549 3.328877  
 C -1.235589 0.000000 3.329682  
 C -2.424525 0.000000 2.593268  
 C -2.805725 -1.174572 1.829762  
 C -1.983894 -2.305910 1.829669  
 C -0.367689 -3.480152 0.594567  
 C 0.367689 -3.480152 -0.594567  
 C 1.748789 -3.032369 -0.594968  
 C 2.343335 -2.599712 0.594605  
 C 3.196341 -1.424946 0.594474  
 C 2.960192 -0.699083 1.829480  
 C 2.960192 0.699083 1.829480  
 C 1.960649 1.424615 2.592169  
 C -0.749345 2.305663 2.592970  
 C 0.249582 3.031412 1.829400  
 C 1.579138 2.598732 1.828863  
 C 2.343334 2.599712 0.594605  
 C 3.196341 1.424946 0.594474  
 C 3.423300 0.725887 -0.595039  
 C 3.423300 -0.725888 -0.595039  
 C 2.805725 -1.174571 -1.829762  
 C 1.983895 -2.305910 -1.829670  
 C -1.748788 -3.032369 0.594968  
 C -0.249582 -3.031413 -1.829400  
 C 0.998749 -0.725818 3.328693

-----c70-----

70

C 0.746978 2.298772 3.218361  
 C 1.966851 2.290187 2.440723  
 C 0.381347 1.173360 3.965992  
 C 2.785729 1.163339 2.441041  
 C 3.394286 0.718494 1.208192  
 C 3.253798 1.455099 -0.000000  
 C 3.394286 0.718494 -1.208192  
 C -1.955272 1.420628 3.217958  
 C -1.569778 2.578201 2.440421  
 C -0.998135 0.725142 3.966047  
 C -0.245186 3.009113 2.440794  
 C 0.365669 3.450471 1.207910  
 C -0.378958 3.544878 -0.000000  
 C 0.365670 3.450472 -1.207911  
 C 2.390398 2.645285 -0.000000  
 C 1.732616 3.006795 1.207973  
 C 1.732616 3.006795 -1.207974

C -1.955272 -1.420628 3.217958  
 C -2.937639 -0.696475 2.440874  
 C -0.998135 -0.725142 3.966046  
 C -2.937639 0.696474 2.440874  
 C -3.168876 1.414274 1.208046  
 C -3.487411 0.735072 -0.000000  
 C -3.168876 1.414274 -1.208046  
 C -1.777506 3.091117 -0.000000  
 C -2.324455 2.577290 1.208136  
 C -2.324455 2.577290 -1.208137  
 C 0.746979 -2.298773 3.218361  
 C -0.245186 -3.009113 2.440794  
 C 0.381347 -1.173360 3.965992  
 C -1.569778 -2.578201 2.440421  
 C -2.324455 -2.577290 1.208136  
 C -1.777506 -3.091117 -0.000000  
 C -2.324455 -2.577290 -1.208136  
 C -3.487412 -0.735072 -0.000000  
 C -3.168876 -1.414274 1.208046  
 C -3.168876 -1.414274 -1.208046  
 C 2.417308 0.000000 3.218866  
 C 2.785730 -1.163339 2.441041  
 C 1.234098 -0.000000 3.966792  
 C 1.966851 -2.290187 2.440724  
 C 1.732616 -3.006795 1.207974  
 C 2.390398 -2.645285 -0.000000  
 C 1.732616 -3.006795 -1.207974  
 C -0.378958 -3.544878 -0.000000  
 C 0.365669 -3.450471 1.207911  
 C 0.365670 -3.450471 -1.207911  
 C 3.253798 -1.455099 -0.000000  
 C 3.394286 -0.718494 1.208192  
 C 3.394286 -0.718494 -1.208192  
 C 0.746979 -2.298772 -3.218360  
 C 1.966851 -2.290187 -2.440723  
 C 2.785729 -1.163339 -2.441041  
 C 0.381347 -1.173360 -3.965992  
 C -1.955272 -1.420628 -3.217957  
 C -1.569778 -2.578201 -2.440420  
 C -0.245186 -3.009113 -2.440794  
 C -0.998135 -0.725142 -3.966046  
 C -1.955272 1.420628 -3.217957  
 C -2.937639 0.696474 -2.440874  
 C -2.937639 -0.696475 -2.440874  
 C -0.998135 0.725142 -3.966046  
 C 0.746978 2.298772 -3.218360  
 C -0.245186 3.009113 -2.440794  
 C -1.569778 2.578201 -2.440421  
 C 0.381347 1.173360 -3.965992  
 C 2.417308 0.000000 -3.218866  
 C 2.785729 1.163339 -2.441041  
 C 1.966851 2.290187 -2.440723  
 C 1.234098 -0.000000 -3.966792

-----sc3nc68-----

72

C -0.000270 -0.000309 3.477189

C -0.998894 1.001515 3.262567  
C -2.312226 0.650170 2.797677  
C -2.651649 -0.718703 2.487505  
C -1.654487 -1.714535 2.726732  
C -0.368231 -1.365848 3.263055  
C 0.593615 -2.326806 2.797442  
C 1.949443 -1.937607 2.486425  
C 2.312180 -0.576222 2.727469  
C 1.366594 0.363349 3.263343  
C 1.718211 1.676322 2.796989  
C 0.702514 2.655319 2.485955  
C -0.657784 2.289637 2.726526  
C -1.725546 2.710678 1.844016  
C -2.774190 1.739241 1.959538  
C -1.485211 -2.849055 1.843861  
C -0.118812 -3.270477 1.958869  
C 3.208822 0.138220 1.843455  
C 2.891176 1.532470 1.958149  
C 3.105989 2.415604 0.871593  
C 2.222000 3.546577 0.704466  
C 0.956969 3.594232 1.418196  
C -0.094683 3.857431 0.432507  
C -1.454177 3.366473 0.595136  
C -2.189240 2.942400 -0.594954  
C -3.293432 2.009667 -0.433262  
C -3.644125 1.482347 0.871377  
C -4.181907 0.151699 0.704634  
C -3.591566 -0.967465 1.419388  
C -3.293428 -2.009665 0.433257  
C -2.189240 -2.942401 0.594954  
C -1.454177 -3.366476 -0.595137  
C -0.094683 -3.857439 -0.432512  
C 0.538634 -3.897095 0.871971  
C 1.960114 -3.697615 0.704582  
C 2.635836 -2.627698 1.419004  
C 3.388960 -1.847949 0.432641  
C 3.641633 -0.424627 0.594695  
C 3.641633 0.424628 -0.594695  
C 3.388963 1.847952 -0.432644  
C 2.635838 2.627705 -1.419005  
C 1.960118 3.697623 -0.704576  
C 0.538636 3.897100 -0.871974  
C -0.118812 3.270482 -1.958872  
C -1.485210 2.849054 -1.843860  
C -1.654481 1.714532 -2.726726  
C -2.651650 0.718705 -2.487504  
C -3.591570 0.967461 -1.419388  
C -4.181911 -0.151699 -0.704625  
C -3.644132 -1.482348 -0.871381  
C -2.774195 -1.739243 -1.959542  
C -1.725543 -2.710673 -1.844012  
C -0.657783 -2.289631 -2.726519  
C 0.702513 -2.655321 -2.485954  
C 0.956974 -3.594236 -1.418199  
C 2.222003 -3.546581 -0.704460  
C 3.105990 -2.415606 -0.871596  
C 2.891182 -1.532473 -1.958153

C 3.208814 -0.138220 -1.843450  
C 2.312172 0.576220 -2.727460  
C 1.949446 1.937610 -2.486425  
C 0.593617 2.326808 -2.797440  
C -0.368226 1.365848 -3.263052  
C -2.312229 -0.650170 -2.797677  
C -0.998897 -1.001512 -3.262565  
C 1.718214 -1.676325 -2.796991  
C 1.366591 -0.363352 -3.263337  
C -0.000270 0.000308 -3.477187  
N 0.001018 0.000001 -0.000007  
Sc 0.985882 -1.701794 -0.000543  
Sc -1.965313 -0.000009 -0.000002  
Sc 0.985877 1.701795 0.000524  
-----sc3nc80-----  
84  
C -2.365884 -0.292930 3.355891  
C -3.201904 0.524876 2.520279  
C -2.666049 1.861969 2.524460  
C -1.308583 0.530912 3.875425  
C -1.490004 1.857283 3.364705  
C 0.000153 0.000454 4.091237  
C 0.195328 -1.398342 3.875817  
C -2.135044 -1.665517 3.053625  
C -0.862709 -2.218735 3.363872  
C -2.833561 -2.226564 1.925960  
C -3.831536 -0.001068 1.361443  
C -3.651527 -1.397158 1.092920  
C -4.001670 0.853698 0.234792  
C -2.789630 2.726364 1.386695  
C -3.480630 2.198098 0.240826  
C -1.716927 3.665819 1.126925  
C -0.374845 2.683187 3.054180  
C -0.512039 3.569283 1.926114  
C 1.114099 0.868752 3.875328  
C 0.929674 2.196948 3.356287  
C 2.352390 0.362802 3.363159  
C 1.437952 -1.901885 3.356712  
C 2.511376 -1.016033 3.054051  
C -0.279409 -3.238217 2.523518  
C 1.146318 -3.034341 2.520072  
C -2.314089 -3.316152 1.125236  
C -0.965352 -3.776133 1.384906  
C -3.604871 -1.921923 -0.244382  
C -2.813117 -3.136551 -0.245593  
C -3.929792 0.349750 -1.107667  
C -3.694525 -1.032854 -1.373941  
C -3.074637 2.519686 -1.118638  
C -3.346368 1.362583 -1.938794  
C -1.309899 4.003064 -0.245709  
C -1.964322 3.393284 -1.392446  
C 0.615527 3.861241 1.091912  
C 0.137349 4.081610 -0.245285  
C 2.055666 2.511767 2.519526  
C 2.944505 1.377784 2.522174  
C 1.915060 3.319335 1.360617

|    |           |           |           |
|----|-----------|-----------|-----------|
| C  | 3.757861  | 1.053076  | 1.386567  |
| C  | 3.348031  | -1.340114 | 1.926289  |
| C  | 4.037007  | -0.346183 | 1.127938  |
| C  | 1.915250  | -3.315949 | 1.361155  |
| C  | 3.033992  | -2.461254 | 1.091771  |
| C  | -0.163499 | -4.114279 | 0.239370  |
| C  | 1.260729  | -3.891588 | 0.234013  |
| C  | -1.959359 | -3.403107 | -1.393202 |
| C  | -0.646317 | -3.928193 | -1.120636 |
| C  | -2.940155 | -1.370782 | -2.528039 |
| C  | -2.058047 | -2.518406 | -2.519732 |
| C  | -2.517571 | 1.020560  | -3.051738 |
| C  | -2.361411 | -0.363897 | -3.367126 |
| C  | -1.150702 | 3.040395  | -2.520637 |
| C  | -1.436608 | 1.897346  | -3.353048 |
| C  | 0.953082  | 3.716344  | -1.375432 |
| C  | 0.283196  | 3.231889  | -2.529044 |
| C  | 2.741340  | 3.040530  | 0.234085  |
| C  | 3.642948  | 1.914897  | 0.240368  |
| C  | 2.268586  | 3.229919  | -1.108708 |
| C  | 3.717513  | 1.403061  | -1.118685 |
| C  | 2.853387  | 2.217607  | -1.939976 |
| C  | 4.121372  | -0.866554 | -0.244930 |
| C  | 3.464795  | -2.158889 | -0.245341 |
| C  | 3.918081  | 0.004950  | -1.391034 |
| C  | 1.661095  | -3.577610 | -1.108764 |
| C  | 0.492494  | -3.582504 | -1.941228 |
| C  | 2.741446  | -2.683098 | -1.375784 |
| C  | -0.925549 | -2.193195 | -3.353495 |
| C  | -1.113614 | -0.868465 | -3.869553 |
| C  | 0.374703  | -2.690943 | -3.053026 |
| C  | -0.195284 | 1.398240  | -3.870411 |
| C  | 0.865825  | 2.226553  | -3.367822 |
| C  | 2.142011  | 1.668851  | -3.051600 |
| C  | 0.000078  | -0.000328 | -4.088564 |
| C  | 3.208924  | -0.524164 | -2.520752 |
| C  | 2.658004  | -1.861476 | -2.529648 |
| C  | 1.495411  | -1.863652 | -3.368031 |
| C  | 2.362037  | 0.294619  | -3.352859 |
| C  | 1.308269  | -0.530407 | -3.869583 |
| N  | -0.001192 | -0.000968 | 0.046702  |
| Sc | -1.008000 | -1.736265 | 0.013725  |
| Sc | -0.992280 | 1.744979  | 0.048051  |
| Sc | 2.005648  | -0.017696 | 0.062189  |

-----cora-c60-----

90

C -4.772972 -0.789886 0.786595  
C -4.765824 -1.044727 -0.604702  
C -4.747494 0.200300 -1.277679  
C -4.744391 1.225296 -0.301335  
C -4.760043 0.613476 0.974277  
C -4.263688 -1.681907 1.720637  
C -4.249763 -2.209754 -1.156130  
C -4.213894 0.364992 -2.548666  
C -4.200944 2.482789 -0.528703  
C -4.235956 1.218508 2.108477  
C -3.861695 2.605332 1.928715  
C -3.844313 3.206868 0.673484  
C -3.833408 2.734206 -1.905838  
C -3.839215 1.726216 -2.867090  
C -3.883532 -2.097299 -2.551919  
C -3.865421 -0.871973 -3.214112  
C -3.912748 -3.231786 -0.187430  
C -3.920108 -2.980963 1.181961  
C -3.913009 -1.081317 2.990145  
C -3.899570 0.298786 3.174440  
H -3.482838 3.171073 2.778290  
H -3.452172 4.219225 0.591247  
H -3.439772 3.710722 -2.183913  
H -3.451711 1.956653 -3.858233  
H -3.512707 -2.974494 -3.079967  
H -3.479052 -0.841784 -4.231697  
H -3.542995 -4.195371 -0.534072  
H -3.554851 -3.757929 1.851569  
H -3.548955 -1.713564 3.798253  
H -3.524785 0.689732 4.118876  
C 0.875099 1.080121 -3.153574  
C 0.888870 -0.362030 -3.323284  
C -0.042813 -1.153444 -2.644866  
C -1.020822 -0.534103 -1.771863  
C -1.033976 0.851425 -1.608861  
C -0.070211 1.674988 -2.312380  
C 2.250594 1.543246 -3.139295  
C 3.114703 0.387478 -3.299615  
C 2.273259 -0.790120 -3.412918  
C 2.672964 -1.994761 -2.825362  
C 0.370299 -2.404939 -2.035842  
C -1.213696 -1.398972 -0.626581  
C -1.410816 -0.847033 0.639015  
C -1.425089 0.589686 0.807948  
C -1.240277 1.423273 -0.294809  
C -0.405181 2.603409 -0.181924  
C 0.320509 2.759133 -1.429504  
C 1.645669 3.206536 -1.417386  
C 2.628846 2.586882 -2.287933  
C 4.325157 0.317342 -2.602726  
C 4.717507 1.399756 -1.718756  
C 3.884776 2.512753 -1.563947  
C 3.678046 3.086849 -0.246445  
C 2.294285 3.516178 -0.155940

C 1.593469 3.366611 1.045737  
C 0.217566 2.904875 1.032846  
C 0.024792 2.036901 2.181430  
C -0.779390 0.900235 2.067579  
C -0.355368 -2.556608 -0.788018  
C 1.705208 -1.575474 3.218594  
C 1.326427 -2.618330 2.366254  
C 2.309450 -3.237088 1.495551  
C 3.634765 -2.790254 1.508199  
C 4.027504 -1.708090 2.392197  
C 3.066369 0.330397 3.400215  
C 1.682480 0.758781 3.492449  
C 0.841601 -0.419186 3.378754  
C -0.366432 -0.348748 2.679010  
C -0.757062 -1.429398 1.793892  
C 0.069382 -2.545974 1.642918  
C 1.660187 -3.547302 0.234121  
C 2.361011 -3.398729 -0.967579  
C 3.736328 -2.934933 -0.953781  
C 4.361666 -2.636774 0.260844  
C 5.203049 -1.459071 0.373929  
C 4.996437 -0.885190 1.691314  
C 4.982706 0.503578 1.854357  
C 3.999807 1.122792 2.724722  
C 1.282234 1.962895 2.903778  
C 2.251267 2.784491 2.201713  
C 3.584996 2.372736 2.114374  
C 4.311357 2.526178 0.867161  
C 5.175260 1.370786 0.706309  
C 5.374663 0.818161 -0.562447  
C 5.389021 -0.623545 -0.731925  
C 4.740326 -0.933251 -1.993100  
C 3.929410 -2.067395 -2.101984  
C 0.275596 -3.120532 0.325070  
C 1.703838 -2.817102 -2.123698  
C 3.080210 -1.111517 3.230591

-----cora-c70-----

100

C -1.099102 0.665538 5.034558  
C -0.790614 -0.713586 5.110856  
C 0.618633 -0.847217 5.113037  
C 1.180841 0.449231 5.037459  
C 0.119450 1.383826 4.985444  
C -2.282236 1.145683 4.489359  
C -1.642278 -1.704807 4.642339  
C 1.270976 -1.981067 4.648234  
C 2.434324 0.698056 4.495169  
C 0.238388 2.627440 4.380069  
C 1.589374 2.979688 3.997195  
C 2.634931 2.062538 4.055075  
C 3.209341 -0.490469 4.210152  
C 2.654658 -1.765718 4.280375  
C -0.990906 -2.964280 4.351463  
C 0.395521 -3.095796 4.354620  
C -2.959013 -1.233060 4.269048  
C -3.264647 0.123510 4.199253

C -2.221125 2.523883 4.050354  
C -1.021420 3.227569 3.994942  
H 1.782703 3.956216 3.556286  
H 3.603315 2.356937 3.654500  
H 4.222353 -0.388868 3.824697  
H 3.256556 -2.609642 3.947509  
H -1.589504 -3.812154 4.021733  
H 0.825894 -4.041171 4.027607  
H -3.707891 -1.948525 3.933284  
H -4.239396 0.413127 3.810509  
H -3.116059 2.997350 3.650671  
H -1.027089 4.223909 3.555873  
C 2.980039 -2.711219 -1.282087  
C 2.190824 -2.744322 -0.069286  
C 3.833457 -1.631547 -1.537606  
C 2.282028 -1.701082 0.848256  
C 1.087593 -1.199527 1.484773  
C -0.178423 -1.803641 1.271367  
C -1.311226 -0.973689 1.475952  
C 3.096508 -1.588538 -3.889906  
C 2.210227 -2.699073 -3.618379  
C 3.892417 -1.057914 -2.868102  
C 2.152906 -3.250061 -2.339988  
C 0.876396 -3.630425 -1.778710  
C -0.325899 -3.539339 -2.533549  
C -1.530003 -3.402929 -1.788672  
C -0.278059 -2.904784 0.305462  
C 0.899664 -3.317400 -0.376234  
C -1.506362 -3.090855 -0.386177  
C 3.360401 1.229632 -3.622172  
C 2.532464 0.675440 -4.671882  
C 4.026753 0.380071 -2.731298  
C 2.402636 -0.705654 -4.802664  
C 1.111560 -1.279287 -5.105219  
C -0.023945 -0.463414 -5.364265  
C -1.293695 -1.053588 -5.115519  
C -0.264905 -2.957717 -3.882015  
C 0.992549 -2.510539 -4.373270  
C -1.412866 -2.284865 -4.384115  
C 3.406330 1.847325 -0.849470  
C 2.711584 2.717640 -1.773669  
C 4.051376 0.695696 -1.316334  
C 2.688890 2.414037 -3.133362  
C 1.470894 2.596773 -3.889057  
C 0.308689 3.167817 -3.300868  
C -0.934554 2.823657 -3.899563  
C 0.112590 0.993359 -5.226467  
C 1.374589 1.523609 -4.840397  
C -1.031351 1.750316 -4.850388  
C 3.169526 -0.587255 0.594930  
C 2.495672 0.602796 1.063323  
C 3.930760 -0.547195 -0.578721  
C 2.615344 1.797825 0.360455  
C 1.457583 2.645755 0.189560  
C 0.213278 2.336790 0.803027  
C -0.946821 2.872169 0.180239  
C 0.332616 3.489281 -1.866714

C 1.517253 3.214543 -1.129168  
C -0.888471 3.440082 -1.139010  
C 0.091656 1.077253 1.547831  
C 1.220159 0.220990 1.619033  
C -1.177796 0.446573 1.610655  
C -3.001251 2.450032 -0.876769  
C -2.243425 2.254155 0.340159  
C -2.355324 1.059351 1.044258  
C -3.845967 1.438792 -1.349815  
C -3.047799 1.831466 -3.649606  
C -2.171679 2.870993 -3.154165  
C -2.148727 3.174350 -1.794540  
C -3.869359 1.123061 -2.765010  
C -3.311227 -0.984928 -3.916906  
C -2.457039 -0.248434 -4.822683  
C -2.327922 1.132335 -4.691881  
C -4.003391 -0.314954 -2.901412  
C -3.429223 -2.107716 -1.309190  
C -2.708379 -2.792329 -2.360624  
C -2.650575 -2.241585 -3.639210  
C -4.063727 -0.887727 -1.570909  
C -3.235583 0.015557 0.569090  
C -2.573082 -1.243989 0.828371  
C -2.670240 -2.286117 -0.089659  
C -3.964892 0.195977 -0.611729

-----cora-sc3nc68-----

102

C 5.155396 -1.385806 0.621240  
C 5.142520 -1.488633 -0.790584  
C 5.189041 -0.178022 -1.324537  
C 5.239573 0.734421 -0.243200  
C 5.213478 -0.012038 0.959478  
C 4.591349 -2.344928 1.451843  
C 4.566280 -2.558237 -1.463578  
C 4.654072 0.150620 -2.563171  
C 4.770475 2.038258 -0.333424  
C 4.709838 0.494127 2.150056  
C 4.417409 1.911403 2.121212  
C 4.449532 2.646892 0.940145  
C 4.416460 2.457054 -1.672395  
C 4.353868 1.556524 -2.732447  
C 4.195706 -2.275316 -2.833116  
C 4.233661 -0.984839 -3.355143  
C 4.177980 -3.661711 -0.610911  
C 4.189572 -3.560068 0.777307  
C 4.248163 -1.864953 2.774022  
C 4.304336 -0.514021 3.106306  
H 4.062747 2.403154 3.025310  
H 4.118202 3.683363 0.968794  
H 4.080251 3.478658 -1.842117  
H 3.970118 1.908863 -3.688492  
H 3.770950 -3.068260 -3.446875  
H 3.837622 -0.819910 -4.355945  
H 3.760036 -4.561600 -1.058961  
H 3.782242 -4.385135 1.359230  
H 3.836099 -2.559544 3.504300

H 3.931436 -0.206725 4.081822  
C -1.992699 0.027159 3.529742  
C -3.091770 0.913924 3.302533  
C -4.328692 0.431839 2.751624  
C -4.489043 -0.952730 2.372574  
C -3.393603 -1.834168 2.629102  
C -2.185234 -1.361608 3.245722  
C -1.094928 -2.183264 2.795779  
C 0.219010 -1.623371 2.573665  
C 0.404786 -0.241158 2.885387  
C -0.670139 0.557329 3.408728  
C -0.454673 1.921503 3.011408  
C -1.562548 2.787726 2.682502  
C -2.880796 2.256387 2.835803  
C -3.945853 2.588380 1.913343  
C -4.875378 1.495197 1.932593  
C -3.047883 -2.901752 1.714226  
C -1.648030 -3.166288 1.885645  
C 1.249277 0.610048 2.077813  
C 0.766574 1.950127 2.229589  
C 0.925811 2.897334 1.188716  
C -0.075360 3.924787 1.017818  
C -1.369593 3.794559 1.665004  
C -2.396053 3.978024 0.635422  
C -3.693562 3.325455 0.705812  
C -4.315178 2.871219 -0.537154  
C -5.310268 1.811884 -0.469146  
C -5.661074 1.188969 0.793869  
C -6.026050 -0.188375 0.547665  
C -5.341624 -1.262928 1.248659  
C -4.872322 -2.218039 0.241148  
C -3.673859 -3.021068 0.426431  
C -2.836213 -3.304027 -0.737622  
C -1.438010 -3.640805 -0.520917  
C -0.867978 -3.664773 0.813153  
C 0.526674 -3.290420 0.730597  
C 1.033309 -2.179216 1.519898  
C 1.729829 -1.272628 0.605323  
C 1.801976 0.156923 0.833205  
C 1.756429 1.048349 -0.318189  
C 1.331868 2.422490 -0.118200  
C 0.547453 3.154420 -1.113653  
C -0.283942 4.108648 -0.396124  
C -1.709106 4.148180 -0.631125  
C -2.233506 3.496342 -1.774234  
C -3.543911 2.912940 -1.748748  
C -3.534479 1.806687 -2.682011  
C -4.417031 0.692815 -2.532895  
C -5.430524 0.784310 -1.507436  
C -5.918346 -0.426534 -0.869670  
C -5.218538 -1.676723 -1.058817  
C -4.271272 -1.782196 -2.106673  
C -3.122127 -2.630698 -1.974497  
C -2.070648 -2.050088 -2.782941  
C -0.689528 -2.262918 -2.483351  
C -0.378647 -3.208954 -1.436691  
C 0.831604 -3.041369 -0.654589

C 1.577977 -1.808807 -0.729558  
C 1.314796 -0.914500 -1.790930  
C 1.458042 0.497456 -1.606693  
C 0.534069 1.141033 -2.515998  
C 0.001202 2.438358 -2.244179  
C -1.374948 2.681632 -2.610933  
C -2.191794 1.635192 -3.162805  
C -3.902852 -0.612023 -2.877961  
C -2.535742 -0.787698 -3.286710  
C 0.216090 -1.160354 -2.702376  
C -0.264312 0.121786 -3.140570  
C -1.653786 0.332365 -3.408435  
N -1.827949 0.181257 0.052052  
Sc -0.654423 -1.397616 0.065634  
Sc -3.779044 -0.039952 -0.032039  
Sc -1.050316 1.980422 0.169516

-----cora-sc3nc80-----  
114

C -0.509953 0.351748 5.725108  
C -0.496345 -1.064769 5.678864  
C 0.850000 -1.485010 5.539150  
C 1.668247 -0.328583 5.500631  
C 0.828170 0.806743 5.617908  
C -1.597846 1.108690 5.306995  
C -1.570196 -1.812096 5.209851  
C 1.205815 -2.679270 4.923714  
C 2.892294 -0.294158 4.843512  
C 1.161220 2.047006 5.087392  
C 2.519097 2.147786 4.595152  
C 3.343249 1.032337 4.477537  
C 3.367204 -1.582468 4.384533  
C 2.564180 -2.718819 4.423412  
C -1.227469 -3.146723 4.765110  
C 0.094899 -3.560018 4.629299  
C -2.778300 -1.049585 4.974141  
C -2.791835 0.341592 5.020262  
C -1.280529 2.477196 4.955216  
C 0.033721 2.924070 4.850711  
H 2.873538 3.098174 4.199276  
H 4.312508 1.152795 3.996597  
H 4.339113 -1.650844 3.898220  
H 2.936898 -3.633111 3.963685  
H -2.017331 -3.815979 4.426500  
H 0.290604 -4.537301 4.189912  
H -3.679906 -1.565969 4.647492  
H -3.703096 0.860920 4.727326  
H -2.082708 3.152610 4.661655  
H 0.210962 3.931836 4.478244  
C 3.194605 -2.293064 -1.487377  
C 2.267935 -3.059042 -0.697557  
C 2.145187 -2.423740 0.590523  
C 3.644867 -1.180022 -0.695577  
C 2.999365 -1.257109 0.582211  
C 3.930531 0.084652 -1.297984  
C 3.859401 0.175496 -2.722757  
C 3.034961 -2.164101 -2.897863

C 3.417835 -0.938616 -3.509685  
C 1.960031 -2.897657 -3.519398  
C 1.158769 -3.719441 -1.290542  
C 1.034667 -3.643192 -2.717586  
C -0.048788 -3.819285 -0.541592  
C 0.925076 -2.472021 1.343265  
C -0.169512 -3.192417 0.751817  
C 0.589347 -1.333450 2.172907  
C 2.622735 -0.081060 1.285669  
C 1.409392 -0.146236 2.059698  
C 3.646377 1.262478 -0.540174  
C 2.992639 1.180817 0.738956  
C 3.205793 2.465457 -1.185699  
C 3.409814 1.380555 -3.367030  
C 3.035668 2.520021 -2.596631  
C 2.689945 -0.427744 -4.650241  
C 2.684890 1.010659 -4.552788  
C 1.280932 -2.459135 -4.723383  
C 1.602834 -1.146094 -5.250369  
C -0.243619 -3.628408 -3.376367  
C -0.111110 -2.931267 -4.642611  
C -1.334888 -3.779307 -1.181583  
C -1.457688 -3.643810 -2.597886  
C -1.546913 -2.753466 0.901835  
C -2.255804 -3.114233 -0.303075  
C -0.801311 -0.891506 2.333901  
C -1.886625 -1.579034 1.657710  
C 0.566440 1.002900 2.171906  
C -0.789778 0.554615 2.302887  
C 2.145505 2.334491 0.882778  
C 2.276390 3.137890 -0.306487  
C 0.907576 2.257266 1.570344  
C 1.185838 3.925602 -0.804901  
C 1.957410 3.337806 -3.094039  
C 1.071553 4.103369 -2.239586  
C 1.571558 1.766433 -5.006276  
C 1.235426 2.950681 -4.269934  
C 0.507153 -0.361585 -5.756164  
C 0.499821 1.076636 -5.643110  
C -1.214179 -2.087270 -5.079408  
C -0.871825 -0.819011 -5.670382  
C -2.561364 -2.907903 -3.105511  
C -2.424511 -2.113167 -4.307827  
C -3.313979 -2.301535 -0.815423  
C -3.487688 -2.247313 -2.232807  
C -2.968274 -0.789802 1.141818  
C -3.686265 -1.155582 -0.054373  
C -1.864803 1.349759 1.767779  
C -2.975375 0.654893 1.224227  
C -0.171751 3.071368 1.125383  
C -0.041525 3.888839 -0.055081  
C -1.533836 2.623965 1.215524  
C -1.342997 3.940340 -0.704804  
C -2.252595 3.140570 0.085139  
C -0.240718 4.171567 -2.904153  
C -0.119017 3.417142 -4.139774  
C -1.472690 4.044089 -2.136391

C -0.861916 1.509395 -5.498011  
C -1.706351 0.347964 -5.497299  
C -1.200868 2.657699 -4.717864  
C -3.269657 -0.953309 -4.154431  
C -3.919928 -1.037282 -2.877633  
C -2.901095 0.303941 -4.713969  
C -4.132705 0.048942 -0.696193  
C -3.701402 1.166609 0.097330  
C -3.313275 2.395415 -0.518762  
C -4.207098 0.140443 -2.120509  
C -2.548865 3.293414 -2.721368  
C -2.432398 2.642335 -4.010474  
C -3.282374 1.487448 -4.009280  
C -3.472239 2.514159 -1.930046  
C -3.917920 1.404801 -2.722547  
N -0.087175 0.119120 -1.713613  
Sc 0.061914 -1.038188 -3.342166  
Sc -0.244108 -0.696854 0.112851  
Sc -0.097579 2.112422 -1.897510

-----suma-c60-----

93

C -3.103490 -3.771562 0.716209  
C -3.103481 -3.771571 -0.716220  
C 3.545568 -3.512951 0.000003  
C 2.634426 -3.844056 -1.219040  
C 1.520040 -4.517179 -0.713002  
C 1.520037 -4.517155 0.713014  
C 2.634422 -3.844031 1.219047  
C 1.288269 -3.474883 -3.260176  
C 2.525527 -3.387588 -2.543496  
C -1.967335 -4.161377 -1.444819  
C -0.911822 -4.685291 -0.694410  
C 0.320260 -4.601259 -1.407411  
C 0.138252 -4.019470 -2.664354  
C -1.398393 -3.860694 -2.862671  
C -1.398400 -3.860663 2.862674  
C 0.138245 -4.019447 2.664353  
C 0.320252 -4.601234 1.407409  
C -0.911829 -4.685263 0.694411  
C -1.967328 -4.161316 1.444810  
C 2.525528 -3.387590 2.543515  
C 1.288270 -3.474898 3.260196  
H -3.961789 -3.325509 1.215693  
H -3.961732 -3.325428 -1.215707  
H 3.844813 -2.457658 -0.000006  
H 1.234315 -2.976252 -4.226364  
H 3.334493 -2.827962 -3.009861  
H -1.655877 -2.846818 -3.192639  
H -1.655853 -2.846762 3.192593  
H -1.790241 -4.556601 3.619866  
H 3.334501 -2.827989 3.009897  
H 1.234340 -2.976360 4.226434  
H -1.790215 -4.556668 -3.619845  
H 4.469239 -4.111338 0.000009  
C -3.317436 3.463555 0.725950  
C -3.317438 3.463558 -0.725943

C -2.469823 4.328509 -1.425506  
C -1.588612 5.224610 -0.699269  
C -1.588610 5.224608 0.699277  
C -2.469820 4.328505 1.425513  
C -3.488721 2.093939 1.174799  
C -3.593527 1.247190 0.000000  
C -3.488724 2.093943 -1.174796  
C -2.803650 1.638352 -2.305968  
C -1.759532 3.855755 -2.600220  
C -0.334327 5.306304 -1.425125  
C 0.874014 5.385085 -0.725790  
C 0.874015 5.385083 0.725794  
C -0.334323 5.306301 1.425131  
C -0.439471 4.460037 2.599898  
C -1.759525 3.855746 2.600222  
C -1.923136 2.535588 3.032499  
C -2.803646 1.638343 2.305969  
C -3.009082 -0.023394 -0.000001  
C -2.296101 -0.492818 1.173005  
C -2.199115 0.318782 2.306547  
C -0.943222 0.400990 3.032732  
C -0.773343 1.770772 3.481576  
C 0.498337 2.353721 3.482319  
C 0.667650 3.722928 3.031663  
C 1.922692 3.805025 2.306022  
C 2.023512 4.620638 1.174531  
C -0.439476 4.460043 -2.599894  
C 3.212110 2.030398 -1.174945  
C 2.528408 2.486059 -2.306891  
C 1.648180 1.589050 -3.033646  
C 1.483716 0.269253 -2.599919  
C 2.190907 -0.200770 -1.423404  
C 3.042548 0.660521 0.726426  
C 3.212117 2.030394 1.174937  
C 3.316553 2.877199 -0.000004  
C 2.733835 4.148285 -0.000001  
C 2.023510 4.620641 -1.174531  
C 1.922687 3.805032 -2.306025  
C 0.498330 2.353730 -3.482320  
C -0.773350 1.770781 -3.481587  
C -0.943229 0.401000 -3.032737  
C 0.163420 -0.332140 -2.596215  
C 0.058690 -1.174791 -1.420671  
C 1.308240 -1.093177 -0.697365  
C 1.308244 -1.093179 0.697349  
C 2.190915 -0.200777 1.423393  
C 2.528415 2.486052 2.306884  
C 1.648184 1.589043 3.033633  
C 1.483723 0.269245 2.599908  
C 0.163427 -0.332148 2.596205  
C 0.058696 -1.174790 1.420657  
C -1.146325 -1.253412 0.723139  
C -1.146330 -1.253410 -0.723151  
C -2.296107 -0.492815 -1.173013  
C -2.199121 0.318790 -2.306551  
C 0.667643 3.722937 -3.031665  
C -1.923142 2.535598 -3.032498

C 3.042540 0.660526 -0.726436  
-----suma-c70-----  
103  
C -3.378339 0.667436 3.896671  
C -3.377573 -0.764920 3.878644  
C 3.291415 -0.048597 4.127086  
C 2.351993 -1.269887 4.352096  
C 1.187684 -0.773260 4.943623  
C 1.186873 0.653428 4.960788  
C 2.350727 1.165800 4.381988  
C 1.033115 -3.295667 3.828681  
C 2.275906 -2.582203 3.857497  
C -2.266569 -1.497895 4.326464  
C -1.249483 -0.755298 4.930918  
C -0.014111 -1.467703 4.923132  
C -0.152961 -2.711413 4.301645  
C -1.675243 -2.908233 4.035635  
C -1.678323 2.808067 4.107940  
C -0.155729 2.605956 4.368135  
C -0.015500 1.346923 4.957753  
C -1.250081 0.633343 4.947890  
C -2.267944 1.389962 4.362500  
C 2.273228 2.489938 3.920234  
C 1.029749 3.202802 3.909625  
H -4.209541 1.171789 3.407683  
H -4.208022 -1.257472 3.376536  
H 3.702869 -0.035724 3.111152  
H 1.017355 -4.250331 3.305437  
H 3.125203 -3.039277 3.353055  
H -1.867425 -3.217159 3.000677  
H -1.872123 3.143608 3.081701  
H -2.113203 3.562857 4.780660  
H 3.121999 2.960556 3.427478  
H 1.013330 4.170463 3.410830  
H -2.109833 -3.680996 4.687819  
H 4.146538 -0.056794 4.820048  
C 3.231508 -2.288425 -1.233989  
C 2.462546 -2.294858 -0.008468  
C 3.979072 -1.159684 -1.591829  
C 2.464676 -1.175193 0.817132  
C 1.238484 -0.735916 1.438183  
C 0.032411 -1.470540 1.302709  
C -1.169739 -0.733577 1.456502  
C 3.212512 -1.376734 -3.924778  
C 2.436608 -2.538247 -3.547973  
C 3.969035 -0.693994 -2.965079  
C 2.445941 -2.986040 -2.228617  
C 1.217155 -3.434601 -1.614090  
C 0.003743 -3.517828 -2.351298  
C -1.198831 -3.432005 -1.596664  
C 0.025090 -2.651792 0.428598  
C 1.227481 -3.008685 -0.241271  
C -1.187613 -3.005418 -0.224262  
C 3.215983 1.464940 -3.889445  
C 2.430665 0.753709 -4.874798  
C 3.970773 0.756722 -2.946978



|   |           |           |           |
|---|-----------|-----------|-----------|
| C | 2.428974  | -0.639262 | -4.892039 |
| C | 1.193896  | -1.352702 | -5.123351 |
| C | -0.015504 | -0.668226 | -5.424624 |
| C | -1.222001 | -1.349980 | -5.105705 |
| C | -0.005947 | -3.045419 | -3.743585 |
| C | 1.198751  | -2.526088 | -4.293200 |
| C | -1.217365 | -2.523350 | -4.275465 |
| C | 3.237376  | 2.309679  | -1.176865 |
| C | 2.453265  | 3.033456  | -2.153914 |
| C | 3.982033  | 1.188175  | -1.562551 |
| C | 2.442857  | 2.618464  | -3.483827 |
| C | 1.204980  | 2.627852  | -4.228940 |
| C | 0.001612  | 3.136459  | -3.666563 |
| C | -1.210943 | 2.630434  | -4.211093 |
| C | -0.013693 | 0.801704  | -5.406265 |
| C | 1.197292  | 1.475686  | -5.088160 |
| C | -1.218469 | 1.478353  | -5.070388 |
| C | 3.243338  | -0.010229 | 0.460136  |
| C | 2.467574  | 1.147447  | 0.845751  |
| C | 3.986616  | 0.003579  | -0.725789 |
| C | 2.468300  | 2.287383  | 0.048333  |
| C | 1.234864  | 3.009644  | -0.166526 |
| C | 0.031486  | 2.638923  | 0.494027  |
| C | -1.180403 | 3.011935  | -0.149491 |
| C | 0.012357  | 3.574637  | -2.263035 |
| C | 1.225616  | 3.469743  | -1.528168 |
| C | -1.190529 | 3.472696  | -1.510740 |
| C | 0.035920  | 1.436508  | 1.338433  |
| C | 1.240234  | 0.695967  | 1.455821  |
| C | -1.167990 | 0.698821  | 1.473964  |
| C | -3.199774 | 2.317404  | -1.129832 |
| C | -2.412699 | 2.292876  | 0.084042  |
| C | -2.403007 | 1.152615  | 0.881501  |
| C | -3.951664 | 1.197184  | -1.504409 |
| C | -3.219434 | 1.472316  | -3.842257 |
| C | -2.437979 | 2.623898  | -3.448155 |
| C | -2.428137 | 3.039045  | -2.118195 |
| C | -3.961651 | 0.765693  | -2.888534 |
| C | -3.222890 | -1.369612 | -3.877661 |
| C | -2.451884 | -0.633763 | -4.856378 |
| C | -2.450169 | 0.759215  | -4.839081 |
| C | -3.963483 | -0.685149 | -2.906714 |
| C | -3.205156 | -2.281766 | -1.187019 |
| C | -2.435448 | -2.980654 | -2.192920 |
| C | -2.444352 | -2.532735 | -3.512365 |
| C | -3.954503 | -1.150989 | -1.533786 |
| C | -3.185982 | -0.003123 | 0.506981  |
| C | -2.405860 | -1.169660 | 0.853151  |
| C | -2.418112 | -2.289396 | 0.027251  |
| C | -3.945795 | 0.012379  | -0.667405 |

-----suma-sc3nc68-----

105

|   |           |          |           |
|---|-----------|----------|-----------|
| C | -2.836683 | 4.354701 | -0.130989 |
| C | -2.431294 | 4.429433 | -1.502166 |
| C | 3.737878  | 4.079001 | 1.041159  |
| C | 3.201772  | 4.480652 | -0.361620 |

|   |           |           |           |
|---|-----------|-----------|-----------|
| C | 1.994657  | 5.156353  | -0.155300 |
| C | 1.591462  | 5.075232  | 1.213148  |
| C | 2.515150  | 4.341161  | 1.964948  |
| C | 2.478905  | 4.208832  | -2.706535 |
| C | 3.463640  | 4.068507  | -1.676151 |
| C | -1.143294 | 4.861061  | -1.856242 |
| C | -0.348071 | 5.346472  | -0.813637 |
| C | 1.037965  | 5.288865  | -1.154136 |
| C | 1.217006  | 4.758981  | -2.435533 |
| C | -0.197662 | 4.619946  | -3.067075 |
| C | -1.810361 | 4.304653  | 2.401572  |
| C | -0.283444 | 4.461025  | 2.653310  |
| C | 0.242950  | 5.130314  | 1.544109  |
| C | -0.740313 | 5.270421  | 0.517230  |
| C | -1.958331 | 4.705250  | 0.906168  |
| C | 2.036522  | 3.780049  | 3.157448  |
| C | 0.647179  | 3.842712  | 3.501316  |
| H | -3.792618 | 3.879810  | 0.082979  |
| H | -3.103610 | 4.005851  | -2.246296 |
| H | 4.045203  | 3.026597  | 1.068191  |
| H | 2.690026  | 3.742743  | -3.667703 |
| H | 4.365001  | 3.507135  | -1.917155 |
| H | -0.347595 | 3.620684  | -3.494767 |
| H | -2.140270 | 3.272234  | 2.571573  |
| H | -2.407950 | 4.948121  | 3.064994  |
| H | 2.679429  | 3.163679  | 3.783631  |
| H | 0.318429  | 3.268525  | 4.365851  |
| H | -0.365152 | 5.347141  | -3.876025 |
| H | 4.611496  | 4.680649  | 1.335639  |
| C | 0.293116  | -1.777245 | 3.369985  |
| C | -0.897590 | -0.986918 | 3.297402  |
| C | -2.178130 | -1.598022 | 3.068466  |
| C | -2.301593 | -3.022861 | 2.863492  |
| C | -1.108600 | -3.804746 | 2.960076  |
| C | 0.158734  | -3.197667 | 3.262349  |
| C | 1.196756  | -3.995111 | 2.669095  |
| C | 2.386883  | -3.385398 | 2.122115  |
| C | 2.522272  | -1.969824 | 2.258678  |
| C | 1.514866  | -1.186059 | 2.918621  |
| C | 1.532954  | 0.137796  | 2.359843  |
| C | 0.315069  | 0.889859  | 2.190040  |
| C | -0.894629 | 0.306179  | 2.672363  |
| C | -2.149239 | 0.473520  | 1.969524  |
| C | -2.964771 | -0.664118 | 2.287513  |
| C | -0.870694 | -4.940284 | 2.093547  |
| C | 0.550394  | -5.100072 | 1.989904  |
| C | 3.116512  | -1.158501 | 1.216278  |
| C | 2.563548  | 0.159002  | 1.341884  |
| C | 2.425583  | 0.994768  | 0.207637  |
| C | 1.328973  | 1.929533  | 0.157607  |
| C | 0.212735  | 1.786723  | 1.067951  |
| C | -1.009137 | 1.800839  | 0.269890  |
| C | -2.207489 | 1.087778  | 0.672800  |
| C | -3.034511 | 0.471788  | -0.360663 |
| C | -3.904102 | -0.632948 | 0.013360  |
| C | -3.940461 | -1.135830 | 1.374537  |
| C | -4.236223 | -2.551168 | 1.340439  |

|    |           |           |           |
|----|-----------|-----------|-----------|
| C  | -3.338583 | -3.501659 | 1.978435  |
| C  | -3.006181 | -4.527055 | 0.984123  |
| C  | -1.734844 | -5.232937 | 0.984025  |
| C  | -1.134092 | -5.588931 | -0.300432 |
| C  | 0.301550  | -5.815438 | -0.354383 |
| C  | 1.130706  | -5.659857 | 0.825459  |
| C  | 2.442904  | -5.216987 | 0.415135  |
| C  | 3.010225  | -4.001937 | 0.974188  |
| C  | 3.438452  | -3.160870 | -0.146643 |
| C  | 3.442001  | -1.707661 | -0.070982 |
| C  | 3.091631  | -0.945022 | -1.267816 |
| C  | 2.603588  | 0.415758  | -1.108590 |
| C  | 1.569453  | 0.987779  | -1.977122 |
| C  | 0.825244  | 1.951870  | -1.188255 |
| C  | -0.613152 | 1.884921  | -1.120123 |
| C  | -1.305125 | 1.083678  | -2.059839 |
| C  | -2.532567 | 0.431297  | -1.706797 |
| C  | -2.624226 | -0.766199 | -2.515203 |
| C  | -3.363631 | -1.909618 | -2.080738 |
| C  | -4.148795 | -1.770823 | -0.876505 |
| C  | -4.396334 | -2.932308 | -0.040667 |
| C  | -3.650489 | -4.149665 | -0.257799 |
| C  | -2.936986 | -4.312901 | -1.470376 |
| C  | -1.720412 | -5.070737 | -1.505042 |
| C  | -0.905471 | -4.518224 | -2.567132 |
| C  | 0.520102  | -4.617041 | -2.547425 |
| C  | 1.114507  | -5.429406 | -1.511316 |
| C  | 2.445440  | -5.108803 | -1.021561 |
| C  | 3.063991  | -3.849224 | -1.367892 |
| C  | 2.513830  | -3.085491 | -2.426718 |
| C  | 2.578899  | -1.652025 | -2.408574 |
| C  | 1.433843  | -1.166010 | -3.149298 |
| C  | 0.865231  | 0.120600  | -2.891262 |
| C  | -0.572364 | 0.237227  | -2.979417 |
| C  | -1.398702 | -0.908525 | -3.249900 |
| C  | -2.827908 | -3.210385 | -2.404668 |
| C  | -1.563988 | -3.346417 | -3.074708 |
| C  | 1.270332  | -3.489445 | -3.052111 |
| C  | 0.608373  | -2.291756 | -3.490471 |
| C  | -0.819279 | -2.195258 | -3.482990 |
| N  | -0.267327 | -1.992738 | -0.064599 |
| Sc | 1.012335  | -3.474710 | -0.189219 |
| Sc | -2.164795 | -2.325756 | 0.307426  |
| Sc | 0.353372  | -0.139111 | -0.308883 |

-----suma-sc3nc80-----

117

|   |           |           |          |
|---|-----------|-----------|----------|
| C | -2.699766 | 1.174693  | 4.712662 |
| C | -3.086539 | -0.204223 | 4.660982 |
| C | 3.487890  | -1.290935 | 4.336159 |
| C | 2.285813  | -2.230156 | 4.643027 |
| C | 1.358724  | -1.473167 | 5.366021 |
| C | 1.744709  | -0.099530 | 5.418160 |
| C | 2.944263  | 0.111660  | 4.732802 |
| C | 0.429950  | -3.800618 | 4.199597 |
| C | 1.816471  | -3.444085 | 4.120307 |
| C | -2.197070 | -1.221920 | 5.034147 |

|   |           |           |           |
|---|-----------|-----------|-----------|
| C | -0.978250 | -0.804243 | 5.578894  |
| C | 0.016064  | -1.820077 | 5.444637  |
| C | -0.504615 | -2.951288 | 4.808330  |
| C | -2.040122 | -2.731273 | 4.694183  |
| C | -0.489202 | 2.777434  | 4.867514  |
| C | 0.935259  | 2.166560  | 5.001348  |
| C | 0.777150  | 0.889503  | 5.546757  |
| C | -0.603075 | 0.532099  | 5.626169  |
| C | -1.416687 | 1.556191  | 5.132700  |
| C | 3.188664  | 1.427291  | 4.308351  |
| C | 2.191758  | 2.447165  | 4.442226  |
| H | -3.384779 | 1.901358  | 4.279839  |
| H | -4.041320 | -0.438480 | 4.193641  |
| H | 3.764171  | -1.327158 | 3.274851  |
| H | 0.108662  | -4.685464 | 3.652544  |
| H | 2.461849  | -4.079149 | 3.515814  |
| H | -2.415702 | -2.967363 | 3.691850  |
| H | -0.652115 | 3.194628  | 3.866144  |
| H | -0.660835 | 3.591895  | 5.587595  |
| H | 4.082312  | 1.674198  | 3.738343  |
| H | 2.391427  | 3.405818  | 3.967160  |
| H | -2.594811 | -3.366018 | 5.402362  |
| H | 4.385727  | -1.565359 | 4.910563  |
| C | 3.433745  | -1.884134 | -1.524303 |
| C | 2.591341  | -2.704890 | -0.696526 |
| C | 2.411545  | -2.033667 | 0.564392  |
| C | 3.774157  | -0.700773 | -0.782616 |
| C | 3.144766  | -0.789673 | 0.502021  |
| C | 3.928959  | 0.560215  | -1.437416 |
| C | 3.840127  | 0.584747  | -2.862960 |
| C | 3.255977  | -1.829559 | -2.936747 |
| C | 3.509667  | -0.598291 | -3.600552 |
| C | 2.256893  | -2.691368 | -3.517997 |
| C | 1.552414  | -3.496417 | -1.252674 |
| C | 1.414230  | -3.490362 | -2.679416 |
| C | 0.363557  | -3.686000 | -0.493049 |
| C | 1.202639  | -2.170012 | 1.321970  |
| C | 0.185207  | -3.020023 | 0.772109  |
| C | 0.756409  | -1.039549 | 2.105367  |
| C | 2.650149  | 0.369794  | 1.155985  |
| C | 1.451865  | 0.215897  | 1.937536  |
| C | 3.527433  | 1.733162  | -0.726698 |
| C | 2.890647  | 1.639016  | 0.558623  |
| C | 2.966397  | 2.856608  | -1.416983 |
| C | 3.270500  | 1.710652  | -3.552237 |
| C | 2.787247  | 2.837590  | -2.827221 |
| C | 2.732374  | -0.210867 | -4.755482 |
| C | 2.582884  | 1.221121  | -4.716446 |
| C | 1.533025  | -2.373799 | -4.732704 |
| C | 1.718898  | -1.058350 | -5.313487 |
| C | 0.140152  | -3.633575 | -3.329096 |
| C | 0.196730  | -2.978851 | -4.621734 |
| C | -0.921949 | -3.801262 | -1.123543 |
| C | -1.063696 | -3.740080 | -2.542502 |
| C | -1.227815 | -2.718310 | 0.918349  |
| C | -1.900636 | -3.196274 | -0.266105 |
| C | -0.669553 | -0.736604 | 2.272432  |

|                    |           |           |           |    |           |           |           |
|--------------------|-----------|-----------|-----------|----|-----------|-----------|-----------|
| C                  | -1.682292 | -1.555612 | 1.630113  | C  | -0.932070 | -3.769837 | 4.253866  |
| C                  | 0.499956  | 1.277553  | 2.014594  | C  | 0.434429  | -3.761643 | 4.257123  |
| C                  | -0.802865 | 0.701580  | 2.173915  | C  | 0.857383  | -3.866318 | 2.878133  |
| C                  | 1.931550  | 2.705095  | 0.661228  | C  | -1.347259 | -3.877749 | 2.872679  |
| C                  | 1.976406  | 3.468076  | -0.559517 | C  | 2.182185  | -3.809451 | 2.435612  |
| C                  | 0.711412  | 2.535047  | 1.362676  | C  | -4.479644 | -3.709735 | -0.697020 |
| C                  | 0.812903  | 4.126627  | -1.079419 | C  | -4.483917 | -3.709182 | 0.669685  |
| C                  | 1.630063  | 3.522545  | -3.348104 | C  | -3.106836 | -3.828067 | 1.093671  |
| C                  | 0.676612  | 4.233657  | -2.519418 | C  | -3.099931 | -3.828982 | -1.112292 |
| C                  | 1.396838  | 1.840033  | -5.190592 | C  | -2.669181 | -3.832276 | 2.421676  |
| C                  | 0.945545  | 3.011510  | -4.497910 | C  | 0.461160  | -3.765691 | -4.253475 |
| C                  | 0.549115  | -0.409949 | -5.841587 | C  | -0.905325 | -3.773682 | -4.258701 |
| C                  | 0.397411  | 1.022936  | -5.791509 | C  | -1.329103 | -3.880514 | -2.880041 |
| C                  | -0.985770 | -2.267941 | -5.082273 | C  | 0.875486  | -3.869351 | -2.871770 |
| C                  | -0.775116 | -0.998006 | -5.724493 | C  | 2.197462  | -3.812148 | -2.420936 |
| C                  | -2.237227 | -3.140129 | -3.070666 | C  | -2.653857 | -3.834472 | -2.437470 |
| C                  | -2.185695 | -2.385849 | -4.304322 | H  | 4.854194  | -3.588360 | 1.370124  |
| C                  | -3.037827 | -2.518651 | -0.802659 | H  | 4.862623  | -3.590164 | -1.339144 |
| C                  | -3.221932 | -2.541097 | -2.218725 | H  | -1.605822 | -3.692579 | 5.099846  |
| C                  | -2.836413 | -0.900027 | 1.086964  | H  | 1.103194  | -3.676563 | 5.106291  |
| C                  | -3.519493 | -1.384724 | -0.087187 | H  | 2.945745  | -3.718277 | 3.204828  |
| C                  | -1.952675 | 1.361989  | 1.615110  | H  | -5.325310 | -3.629872 | -1.370883 |
| C                  | -2.989867 | 0.537672  | 1.110540  | H  | -5.333793 | -3.628783 | 1.338171  |
| C                  | -0.445153 | 3.217608  | 0.893775  | H  | -3.439559 | -3.753570 | 3.185450  |
| C                  | -0.402101 | 3.994082  | -0.320237 | H  | 1.135224  | -3.681278 | -5.098505 |
| C                  | -1.754621 | 2.639104  | 1.012186  | H  | -1.573802 | -3.697040 | -5.108914 |
| C                  | -1.702415 | 3.881058  | -0.960963 | H  | 2.965932  | -3.721838 | -3.185352 |
| C                  | -2.525258 | 3.032008  | -0.132507 | H  | -3.419315 | -3.756271 | -3.206226 |
| C                  | -0.637760 | 4.130047  | -3.172308 | N  | 1.824031  | -3.900117 | 0.006284  |
| C                  | -0.447552 | 3.342593  | -4.374965 | N  | -0.242152 | -3.956793 | 2.064183  |
| C                  | -1.845295 | 3.906187  | -2.392478 | N  | -2.290927 | -3.903743 | -0.006741 |
| C                  | -1.000379 | 1.322210  | -5.653181 | N  | -0.229034 | -3.959108 | -2.064611 |
| C                  | -1.722244 | 0.083520  | -5.594902 | Zn | -0.233539 | -3.964617 | -0.000189 |
| C                  | -1.450352 | 2.459508  | -4.916277 | C  | -3.263819 | 2.989375  | 0.738934  |
| C                  | -3.141620 | -1.311913 | -4.191192 | C  | -3.269224 | 2.989594  | -0.713151 |
| C                  | -3.774759 | -1.408248 | -2.907664 | C  | -2.636348 | 4.020804  | -1.414367 |
| C                  | -2.905080 | -0.048537 | -4.804936 | C  | -1.973022 | 5.090595  | -0.690695 |
| C                  | -4.088959 | -0.259829 | -0.771740 | C  | -1.967788 | 5.090332  | 0.707461  |
| C                  | -3.769088 | 0.926619  | -0.027808 | C  | -2.625739 | 4.020381  | 1.435730  |
| C                  | -3.508665 | 2.161993  | -0.696025 | C  | -3.125885 | 1.615683  | 1.187287  |
| C                  | -4.178971 | -0.236126 | -2.197511 | C  | -3.046408 | 0.767666  | 0.011731  |
| C                  | -2.846949 | 3.036531  | -2.938437 | C  | -3.134639 | 1.616039  | -1.162954 |
| C                  | -2.670574 | 2.349192  | -4.199682 | C  | -2.369881 | 1.323801  | -2.297719 |
| C                  | -3.399781 | 1.116796  | -4.144730 | C  | -1.842608 | 3.717444  | -2.591581 |
| C                  | -3.682673 | 2.204044  | -2.108805 | C  | -0.770446 | 5.448407  | -1.420994 |
| C                  | -4.019145 | 1.024173  | -2.851991 | C  | 0.393015  | 5.793812  | -0.726070 |
| N                  | -0.058345 | 0.174252  | -1.816082 | C  | 0.398401  | 5.793569  | 0.725475  |
| Sc                 | 0.195299  | -1.043306 | -3.389030 | C  | -0.759871 | 5.447945  | 1.428930  |
| Sc                 | -0.177596 | -0.584145 | 0.044438  | C  | -0.670547 | 4.598927  | 2.602724  |
| Sc                 | -0.232861 | 2.152154  | -2.079682 | C  | -1.823335 | 3.716705  | 2.606969  |
| -----porf-c60----- |           |           |           |    |           |           |           |
| 97                 |           |           |           |    |           |           |           |
| C                  | 4.009897  | -3.680711 | 0.696247  | C  | -2.352823 | 1.323129  | 2.316335  |
| C                  | 4.014143  | -3.681620 | -0.670417 | C  | -2.193470 | -0.339997 | 0.008414  |
| C                  | 2.638078  | -3.813584 | -1.093696 | C  | -1.391300 | -0.639641 | 1.178802  |
| C                  | 2.631197  | -3.812212 | 1.111160  | C  | -1.470092 | 0.170926  | 2.313593  |
|                    |           |           |           | C  | -0.261521 | 0.527520  | 3.035658  |
|                    |           |           |           | C  | -0.397113 | 1.901410  | 3.483253  |

C 0.713602 2.752194 3.479768  
 C 0.573780 4.125724 3.031043  
 C 1.776200 4.483942 2.300078  
 C 1.690247 5.302303 1.169321  
 C -0.689826 4.599706 -2.595689  
 C 3.414610 3.039406 -1.186373  
 C 2.642082 3.332352 -2.315007  
 C 1.979940 2.262265 -3.038860  
 C 2.114854 0.938953 -2.607572  
 C 2.917559 0.634927 -1.435394  
 C 3.561695 1.665587 0.713559  
 C 3.423368 3.039066 1.162789  
 C 3.333259 3.887790 -0.011363  
 C 2.483738 4.998852 -0.008099  
 C 1.681579 5.302661 -1.179611  
 C 1.759131 4.484604 -2.311188  
 C 0.687829 2.753168 -3.483371  
 C -0.422868 1.902394 -3.478913  
 C -0.283918 0.528403 -3.032623  
 C 0.961502 0.057411 -2.602836  
 C 1.051734 -0.784862 -1.427849  
 C 2.258004 -0.432921 -0.706734  
 C 2.263216 -0.433214 0.690849  
 C 2.928125 0.634519 1.414819  
 C 2.659189 3.331719 2.297167  
 C 2.002417 2.261425 3.025630  
 C 2.134086 0.938244 2.592950  
 C 0.980702 0.056696 2.596554  
 C 1.062177 -0.785295 1.420723  
 C -0.101854 -1.119475 0.726301  
 C -0.107157 -1.119242 -0.724965  
 C -1.399877 -0.639277 -1.167869  
 C -1.487083 0.171654 -2.301736  
 C 0.551318 4.126606 -3.033328  
 C -1.711672 2.394274 -3.024579  
 C 3.556303 1.665800 -0.738579

-----porf-c70-----

107

C 3.911882 0.685079 4.361672  
 C 3.912098 -0.681300 4.362121  
 C 2.527539 -1.100368 4.345941  
 C 2.527192 1.103701 4.345212  
 C -1.004720 4.246067 3.853386  
 C 0.357187 4.246062 3.966202  
 C 0.764419 2.868735 4.129775  
 C -1.433312 2.868660 3.947439  
 C 2.085669 2.426345 4.248898  
 C -4.571332 -0.682887 3.645246  
 C -4.571522 0.683451 3.644665  
 C -3.205046 1.102818 3.865815  
 C -3.204735 -1.101678 3.866733  
 C -2.755789 2.425728 3.846051  
 C 0.358512 -4.243685 3.969205  
 C -1.003408 -4.244209 3.856555  
 C -1.432434 -2.866877 3.949662  
 C 0.765319 -2.866109 4.131756

C 2.086434 -2.423216 4.250506  
 C -2.755069 -2.424462 3.848032  
 H 4.763222 1.356457 4.354783  
 H 4.763648 -1.352414 4.355664  
 H -1.666399 5.092815 3.709880  
 H 1.033416 5.092931 3.934634  
 H 2.856002 3.194056 4.230729  
 H -5.408841 -1.354392 3.493018  
 H -5.409221 1.354591 3.491874  
 H -3.512533 3.192435 3.696484  
 H 1.035011 -5.090357 3.938162  
 H -1.664834 -5.091278 3.713762  
 H 2.857012 -3.190693 4.232821  
 H -3.511571 -3.191533 3.699112  
 N 1.712369 0.001542 4.360373  
 N -0.341273 2.057271 4.118085  
 N -2.403813 0.000747 4.019072  
 N -0.340641 -2.055010 4.119606  
 Zn -0.343669 0.001138 4.171423  
 C 0.468507 3.216388 -4.514464  
 C 1.667858 2.439064 -4.739672  
 C 0.325453 3.963286 -3.339289  
 C 2.687308 2.438982 -3.789837  
 C 3.369705 1.206232 -3.469327  
 C 3.089504 -0.002268 -4.164948  
 C 3.369107 -1.210260 -3.468193  
 C -2.016893 3.218731 -3.135615  
 C -1.859992 2.440118 -4.345384  
 C -0.942610 3.964349 -2.635631  
 C -0.641562 2.438982 -5.020952  
 C -0.126762 1.205786 -5.570519  
 C -0.875985 -0.001906 -5.518417  
 C -0.127371 -1.210029 -5.569406  
 C 2.014228 -0.002469 -5.166635  
 C 1.300048 1.205802 -5.397018  
 C 1.299438 -1.210596 -5.395890  
 C -1.473030 3.220405 -0.346199  
 C -2.576929 2.443337 -0.869627  
 C -0.665674 3.965969 -1.212425  
 C -2.843920 2.442997 -2.236922  
 C -3.208026 1.208988 -2.896374  
 C -3.391880 0.000296 -2.168210  
 C -3.208621 -1.209171 -2.895242  
 C -2.160246 -0.001243 -4.804941  
 C -2.599967 1.207599 -4.198462  
 C -2.600559 -1.209294 -4.197317  
 C 1.349171 3.219424 -0.001674  
 C 0.509668 2.440138 0.881498  
 C 0.774928 3.966407 -1.036103  
 C -0.872326 2.440832 0.714318  
 C -1.611689 1.209504 0.849509  
 C -0.975735 0.001291 1.235334  
 C -1.612281 -1.206957 0.850613  
 C -3.111606 0.000904 -0.726082  
 C -2.666887 1.209969 -0.122498  
 C -2.667515 -1.207819 -0.121352  
 C 2.549009 3.217508 -2.577736

|                        |           |           |           |    |           |           |           |
|------------------------|-----------|-----------|-----------|----|-----------|-----------|-----------|
| C                      | 3.135294  | 2.441638  | -1.506387 | H  | -3.237752 | 4.175404  | 4.096725  |
| C                      | 1.386838  | 3.964321  | -2.351174 | H  | -0.742033 | 5.224678  | 4.030521  |
| C                      | 2.547659  | 2.442716  | -0.243092 | H  | 1.693944  | 4.180659  | 4.057196  |
| C                      | 2.452590  | 1.208852  | 0.503181  | H  | -4.164684 | -3.226214 | 3.960713  |
| C                      | 3.028188  | -0.000282 | 0.024109  | H  | -5.224070 | -0.733994 | 4.026500  |
| C                      | 2.451994  | -1.208683 | 0.504296  | H  | -4.191555 | 1.701297  | 4.180987  |
| C                      | 0.482176  | 0.001009  | 1.410995  | H  | 3.237860  | -4.175224 | 4.096895  |
| C                      | 1.193168  | 1.208884  | 1.188938  | H  | 0.742138  | -5.224500 | 4.030827  |
| C                      | 1.192553  | -1.207421 | 1.189983  | H  | 4.191665  | -1.701110 | 4.180943  |
| C                      | 3.647491  | -0.001069 | -1.307659 | H  | -1.693835 | -4.180479 | 4.057507  |
| C                      | 3.645784  | 1.207111  | -2.058825 | N  | 1.896051  | 0.798831  | 4.272946  |
| C                      | 3.645176  | -1.209955 | -2.057690 | N  | -0.805925 | 1.900967  | 4.331530  |
| C                      | 1.347550  | -3.219170 | 0.001328  | N  | -1.895936 | -0.798638 | 4.273052  |
| C                      | 2.546446  | -2.443310 | -0.240807 | N  | 0.806040  | -1.900769 | 4.331620  |
| C                      | 3.134070  | -2.443713 | -1.504101 | Zn | 0.000058  | 0.000099  | 4.327282  |
| C                      | 0.772941  | -3.966847 | -1.032384 | C  | 1.258589  | 3.243446  | -2.133837 |
| C                      | -1.474649 | -3.219058 | -0.343200 | C  | 2.114706  | 2.679944  | -3.132539 |
| C                      | -0.873550 | -2.438777 | 0.716571  | C  | 1.617773  | 2.373315  | -4.445442 |
| C                      | 0.508442  | -2.438614 | 0.883731  | C  | 0.228926  | 2.579353  | -4.785081 |
| C                      | -0.667667 | -3.965859 | -1.208708 | C  | -0.612142 | 3.164609  | -3.788793 |
| C                      | -2.018506 | -3.219737 | -3.132599 | C  | -0.092427 | 3.538655  | -2.502393 |
| C                      | -2.845144 | -2.442742 | -2.234631 | C  | -1.157012 | 3.450924  | -1.540521 |
| C                      | -2.578173 | -2.441931 | -0.867335 | C  | -0.905422 | 3.018703  | -0.186065 |
| C                      | -0.944608 | -3.965435 | -2.631915 | C  | 0.451055  | 2.752733  | 0.176766  |
| C                      | 0.466892  | -3.219936 | -4.511443 | C  | 1.522253  | 2.915716  | -0.766990 |
| C                      | -0.642788 | -2.442454 | -5.018675 | C  | 2.577180  | 2.003028  | -0.415737 |
| C                      | -1.861201 | -2.442319 | -4.343091 | C  | 3.377313  | 1.358181  | -1.430923 |
| C                      | 0.323452  | -3.965669 | -3.335576 | C  | 3.121815  | 1.713705  | -2.791895 |
| C                      | 2.547395  | -3.220294 | -2.574723 | C  | 3.194544  | 0.738858  | -3.859599 |
| C                      | 2.686081  | -2.442967 | -3.787548 | C  | 2.328929  | 1.197551  | -4.907377 |
| C                      | 1.666625  | -2.443421 | -4.737377 | C  | -1.989552 | 2.750917  | -3.618055 |
| C                      | 1.384840  | -3.966306 | -2.347459 | C  | -2.340190 | 3.009531  | -2.252165 |
| -----porf-sc3nc68----- |           |           |           | C  | 0.796110  | 1.667847  | 1.066367  |
| 109                    |           |           |           | C  | 2.137752  | 1.271265  | 0.755706  |
|                        |           |           |           | C  | 2.567869  | -0.059901 | 0.971650  |
| C                      | 3.646198  | 2.279470  | 4.059767  | C  | 3.564382  | -0.624648 | 0.089810  |
| C                      | 4.181025  | 1.021937  | 4.094185  | C  | 3.869121  | 0.023499  | -1.175832 |
| C                      | 3.075680  | 0.099439  | 4.223043  | C  | 3.754912  | -0.991373 | -2.228203 |
| C                      | 2.212789  | 2.129301  | 4.173650  | C  | 3.354672  | -0.663223 | -3.587622 |
| C                      | -2.289230 | 3.653992  | 4.160214  | C  | 2.528142  | -1.619411 | -4.321766 |
| C                      | -1.029582 | 4.183609  | 4.126171  | C  | 1.717292  | -1.131250 | -5.426379 |
| C                      | -0.105661 | 3.075253  | 4.224027  | C  | 1.696812  | 0.276027  | -5.777683 |
| C                      | -2.138370 | 2.220254  | 4.273869  | C  | 0.395746  | 0.601925  | -6.314909 |
| C                      | 1.286867  | 3.177231  | 4.158304  | C  | -0.389512 | 1.673823  | -5.725095 |
| C                      | -3.646092 | -2.279292 | 4.060062  | C  | -1.717550 | 1.131261  | -5.426220 |
| C                      | -4.180918 | -1.021757 | 4.094418  | C  | -2.528337 | 1.619393  | -4.321548 |
| C                      | -3.075567 | -0.099250 | 4.223152  | C  | -3.354826 | 0.663184  | -3.587388 |
| C                      | -2.212677 | -2.129114 | 4.173862  | C  | -3.754983 | 0.991283  | -2.227931 |
| C                      | -3.185137 | 1.294145  | 4.244850  | C  | -3.315877 | 2.220290  | -1.595064 |
| C                      | 2.289340  | -3.653808 | 4.160376  | C  | -3.191100 | 1.991818  | -0.174667 |
| C                      | 1.029691  | -4.183425 | 4.126400  | C  | -1.933337 | 2.269190  | 0.497716  |
| C                      | 0.105774  | -3.075062 | 4.224213  | C  | -1.564939 | 1.068265  | 1.243432  |
| C                      | 2.138484  | -2.220062 | 4.273942  | C  | -0.180913 | 0.707282  | 1.486081  |
| C                      | 3.185249  | -1.293955 | 4.244831  | C  | 0.181083  | -0.707512 | 1.486038  |
| C                      | -1.286757 | -3.177045 | 4.158546  | C  | 1.565096  | -1.068483 | 1.243296  |
| H                      | 4.164783  | 3.226386  | 3.960321  | C  | 1.933443  | -2.269377 | 0.497504  |
| H                      | 5.224173  | 0.734166  | 4.026232  | C  | 3.191160  | -1.991970 | -0.174945 |

|                        |           |           |           |    |           |           |           |
|------------------------|-----------|-----------|-----------|----|-----------|-----------|-----------|
| C                      | 3.315841  | -2.220399 | -1.595355 | H  | -4.447477 | 4.252624  | 2.008646  |
| C                      | 2.340131  | -3.009636 | -2.252424 | H  | -4.600534 | -4.981895 | -0.017408 |
| C                      | 1.989407  | -2.750963 | -3.618281 | H  | -4.624373 | -4.213587 | 2.579689  |
| C                      | 0.611984  | -3.164638 | -3.788942 | H  | -4.728450 | -1.867782 | 3.805548  |
| C                      | -0.229143 | -2.579354 | -4.785167 | H  | -4.338800 | 0.136023  | -5.433594 |
| C                      | 0.389230  | -1.673795 | -5.725199 | H  | -4.497947 | -2.457575 | -4.672831 |
| C                      | -0.396062 | -0.601865 | -6.314923 | H  | -4.303874 | 2.438351  | -4.118965 |
| C                      | -1.697103 | -0.275998 | -5.777603 | H  | -4.660022 | -3.676724 | -2.325347 |
| C                      | -2.329164 | -1.197549 | -4.907281 | N  | -4.593286 | 2.265013  | -0.740449 |
| C                      | -3.194704 | -0.738887 | -3.859423 | N  | -4.795641 | 0.882217  | 1.818234  |
| C                      | -3.121906 | -1.713773 | -2.791764 | N  | -4.797129 | -1.678774 | 0.416388  |
| C                      | -3.377322 | -1.358300 | -1.430764 | N  | -4.739096 | -0.288681 | -2.146871 |
| C                      | -3.869105 | -0.023627 | -1.175587 | Zn | -4.747978 | 0.297013  | -0.163609 |
| C                      | -3.564290 | 0.624481  | 0.090054  | C  | -0.156967 | -1.255110 | 3.385648  |
| C                      | -2.567723 | 0.059695  | 0.971808  | C  | -1.096434 | -0.380356 | 2.740596  |
| C                      | -2.137628 | -1.271467 | 0.755791  | C  | -0.683079 | 0.979559  | 2.976851  |
| C                      | -0.795964 | -1.668059 | 1.066353  | C  | 0.847562  | -0.441874 | 4.016353  |
| C                      | -0.450966 | -2.752910 | 0.176688  | C  | 0.525935  | 0.932741  | 3.765441  |
| C                      | 0.905487  | -3.018881 | -0.186228 | C  | 2.206520  | -0.875627 | 4.086784  |
| C                      | 1.156997  | -3.451050 | -1.540718 | C  | 2.513161  | -2.186209 | 3.607044  |
| C                      | 0.092350  | -3.538736 | -2.502522 | C  | 0.178012  | -2.521826 | 2.824197  |
| C                      | -1.617971 | -2.373324 | -4.445430 | C  | 1.508656  | -2.995815 | 2.984389  |
| C                      | -2.114823 | -2.680004 | -3.132509 | C  | -0.520699 | -2.936252 | 1.632086  |
| C                      | -2.577126 | -2.003183 | -0.415651 | C  | -1.717223 | -0.744574 | 1.522031  |
| C                      | -1.522218 | -2.915848 | -0.767007 | C  | -1.437722 | -2.043682 | 0.990829  |
| C                      | -1.258645 | -3.243538 | -2.133879 | C  | -1.995619 | 0.282459  | 0.580948  |
| N                      | -0.000036 | -0.000064 | -2.134994 | C  | -0.935607 | 2.024179  | 2.027004  |
| Sc                     | -1.592211 | 0.594064  | -1.146199 | C  | -1.618856 | 1.650323  | 0.820698  |
| Sc                     | -0.000130 | -0.000061 | -4.097926 | C  | 0.036047  | 3.092953  | 1.912888  |
| Sc                     | 1.592226  | -0.594120 | -1.146303 | C  | 1.547697  | 1.904868  | 3.580588  |
| -----porf-sc3nc80----- |           |           |           |    |           |           |           |
| 121                    |           |           |           |    |           |           |           |
| C                      | -4.267024 | 4.543300  | -0.694545 | C  | 3.227945  | 0.119524  | 4.003569  |
| C                      | -4.234949 | 4.154763  | -2.004958 | C  | 2.902295  | 1.496088  | 3.746374  |
| C                      | -4.440434 | 2.724025  | -2.023752 | C  | 4.481050  | -0.163911 | 3.369032  |
| C                      | -4.489899 | 3.350764  | 0.091443  | C  | 3.768264  | -2.465980 | 2.965165  |
| C                      | -4.686194 | 0.838677  | 4.117981  | C  | 4.744181  | -1.440764 | 2.801337  |
| C                      | -4.626121 | 2.148683  | 3.733693  | C  | 2.138466  | -3.786066 | 1.950603  |
| C                      | -4.680653 | 2.164697  | 2.288148  | C  | 3.538576  | -3.447905 | 1.940656  |
| C                      | -4.778151 | 0.050774  | 2.908385  | C  | 0.048638  | -3.813992 | 0.627354  |
| C                      | -4.551170 | 3.303476  | 1.487482  | C  | 1.447848  | -4.173483 | 0.754308  |
| C                      | -4.662723 | -3.976595 | 0.383863  | C  | -1.411510 | -2.308909 | -0.420416 |
| C                      | -4.674516 | -3.588896 | 1.694906  | C  | -0.524969 | -3.426357 | -0.672779 |
| C                      | -4.759169 | -2.145823 | 1.705213  | C  | -1.938844 | 0.041236  | -0.830928 |
| C                      | -4.738645 | -2.771416 | -0.410762 | C  | -1.621527 | -1.240795 | -1.361000 |
| C                      | -4.769564 | -1.345604 | 2.852336  | C  | -1.319280 | 2.254295  | -0.465409 |
| C                      | -4.474354 | -0.262615 | -4.434549 | C  | -1.510157 | 1.242869  | -1.475753 |
| C                      | -4.555185 | -1.571363 | -4.050798 | C  | 0.345422  | 3.713058  | 0.614989  |
| C                      | -4.703547 | -1.577576 | -2.611817 | C  | -0.308249 | 3.267860  | -0.605936 |
| C                      | -4.576395 | 0.534157  | -3.231312 | C  | 2.336974  | 3.511693  | 1.844552  |
| C                      | -4.449228 | 1.924947  | -3.171240 | C  | 1.778917  | 3.928582  | 0.587295  |
| C                      | -4.716493 | -2.721432 | -1.808231 | C  | 3.955609  | 2.064731  | 2.950665  |
| H                      | -4.145290 | 5.541016  | -0.287961 | C  | 4.941668  | 1.040662  | 2.717680  |
| H                      | -4.082672 | 4.771716  | -2.883514 | C  | 3.689275  | 3.054695  | 1.968218  |
| H                      | -4.651868 | 0.432462  | 5.122553  | C  | 5.718576  | 1.007219  | 1.513206  |
| H                      | -4.535246 | 3.028189  | 4.361311  | C  | 5.550733  | -1.472134 | 1.608289  |
|                        |           |           |           | C  | 6.105273  | -0.286541 | 0.988070  |
|                        |           |           |           | C  | 4.275960  | -3.439504 | 0.727583  |

C 5.301603 -2.447704 0.589189  
C 2.223611 -4.207611 -0.456521  
C 3.622593 -3.859883 -0.465939  
C 0.299746 -3.382494 -1.871892  
C 1.664239 -3.817905 -1.740325  
C -0.910219 -1.286877 -2.584423  
C 0.067542 -2.326733 -2.817407  
C -0.720887 1.192504 -2.662734  
C -0.462722 -0.090456 -3.235020  
C 0.480375 3.204993 -1.803980  
C 0.259086 2.211745 -2.828679  
C 2.568681 3.854456 -0.615272  
C 1.890419 3.529656 -1.819883  
C 4.482065 3.065650 0.784464  
C 5.478800 2.050509 0.552933  
C 3.932824 3.453426 -0.484113  
C 5.536644 1.805970 -0.879622  
C 4.564079 2.670109 -1.506677  
C 6.176680 -0.537452 -0.458417  
C 5.640184 -1.865997 -0.680458  
C 5.846929 0.506581 -1.414866  
C 3.929880 -3.269434 -1.738233  
C 2.727022 -3.229215 -2.519513  
C 4.912087 -2.241600 -1.866125  
C 1.126191 -1.748709 -3.607220  
C 0.798266 -0.373708 -3.860576  
C 2.477411 -2.166249 -3.441453  
C 1.512951 1.933825 -3.465148  
C 2.519304 2.753214 -2.848135  
C 3.851921 2.269840 -2.679145  
C 1.818616 0.622832 -3.946364  
C 5.129910 0.127607 -2.598580  
C 4.699984 -1.232511 -2.842091  
C 3.504286 -1.191280 -3.630212  
C 4.176285 1.000301 -3.238022  
C 3.177313 0.187488 -3.868841  
N 2.007904 -0.136128 0.113843  
Sc 1.119178 -1.920110 -0.148060  
Sc 0.845879 1.469545 0.457123  
Sc 4.004260 0.036695 0.038083

-----sbpc-c60-----

104

C -3.534515 3.109031 -0.715814  
C -3.534519 3.109039 0.715794  
C -4.490932 2.378764 1.426130  
C -5.456732 1.677570 0.704519  
C -5.456723 1.677556 -0.704534  
C -4.490918 2.378741 -1.426147  
C -2.328337 3.795502 -1.145930  
C -2.328340 3.795511 1.145908  
H -4.464288 2.350029 2.512156  
H -6.213324 1.105446 1.236245  
H -6.213307 1.105418 -1.236258  
H -4.464263 2.349984 -2.512173  
C 1.940641 3.617030 -2.457133  
C 0.703625 3.489794 -3.169939

C 0.664189 2.851373 -4.411839  
C 1.860708 2.374043 -4.946097  
C 3.078502 2.507942 -4.247866  
C 3.128966 3.118290 -2.995625  
C 1.625455 4.158655 -1.146513  
C -0.350227 3.970012 -2.291448  
H -0.279663 2.723828 -4.935050  
H 1.855327 1.877786 -5.913763  
H 3.990187 2.113037 -4.689883  
H 4.058712 3.191881 -2.437894  
C 0.703607 3.489810 3.169934  
C 1.940627 3.617038 2.457133  
C 3.128952 3.118316 2.995643  
C 3.078479 2.507974 4.247888  
C 1.860678 2.374064 4.946104  
C 0.664162 2.851387 4.411832  
C -0.350241 3.970033 2.291439  
C 1.625447 4.158639 1.146502  
H 4.058704 3.191914 2.437925  
H 3.990163 2.113083 4.689919  
H 1.855287 1.877802 5.913768  
H -0.279696 2.723831 4.935030  
N 0.291338 4.474084 1.188711  
N -1.757600 4.288352 -0.000013  
N 0.291344 4.474092 -1.188729  
N -1.666795 3.713933 2.309236  
N -1.666782 3.713913 -2.309255  
N 2.316644 4.081990 -0.000003  
B -0.446660 5.014113 -0.000007  
Cl -0.614562 6.882822 -0.000004  
C -0.080316 1.164629 0.724361  
C -0.080321 1.164627 -0.724330  
C -1.174241 0.650103 -1.422542  
C -2.309523 0.116433 -0.698063  
C -2.309516 0.116429 0.698106  
C -1.174229 0.650095 1.422579  
C 1.266841 0.874777 1.172494  
C 2.100949 0.698409 0.000005  
C 1.266831 0.874776 -1.172475  
C 1.471929 0.083468 -2.304429  
C -0.964579 -0.169001 -2.600006  
C -2.803395 -1.037120 -1.424419  
C -3.279268 -2.150971 -0.726196  
C -3.279260 -2.150976 0.726228  
C -2.803381 -1.037131 1.424455  
C -1.971402 -1.215340 2.600604  
C -0.964557 -0.169019 2.600033  
C 0.335745 -0.449730 3.029950  
C 1.471949 0.083451 2.304436  
C 3.112592 -0.264988 -0.000001  
C 3.325269 -1.091144 1.174979  
C 2.519534 -0.918764 2.305643  
C 2.029260 -2.076398 3.031820  
C 0.678985 -1.785962 3.480273  
C -0.290300 -2.794000 3.480506  
C -1.640767 -2.503821 3.032911  
C -2.131619 -3.661148 2.306844

C -2.935162 -3.487722 1.174820  
 C -1.971424 -1.215322 -2.600575  
 C -0.879697 -5.462597 -1.174513  
 C -1.084556 -4.666790 -2.306209  
 C 0.053250 -4.130696 -3.031331  
 C 1.353526 -4.410856 -2.599630  
 C 1.565463 -5.236645 -1.424846  
 C 0.469868 -5.752858 0.725786  
 C -0.879687 -5.462605 1.174504  
 C -1.713698 -5.282378 -0.000001  
 C -2.721566 -4.313613 0.000007  
 C -2.935175 -3.487715 -1.174800  
 C -2.131638 -3.661130 -2.306830  
 C -0.290329 -2.793975 -3.480501  
 C 0.678955 -1.785937 -3.480270  
 C 2.029232 -2.076376 -3.031826  
 C 2.360424 -3.364592 -2.599710  
 C 3.193962 -3.543986 -1.425056  
 C 2.702917 -4.701236 -0.699113  
 C 2.702923 -4.701243 0.699079  
 C 1.565474 -5.236655 1.424818  
 C -1.084538 -4.666807 2.306207  
 C 0.053275 -4.130717 3.031323  
 C 1.353549 -4.410875 2.599611  
 C 2.360447 -3.364610 2.599689  
 C 3.193972 -3.543997 1.425025  
 C 3.667070 -2.428487 0.725971  
 C 3.667066 -2.428480 -0.725999  
 C 3.325263 -1.091131 -1.174993  
 C 2.519513 -0.918748 -2.305648  
 C -1.640793 -2.503800 -3.032894  
 C 0.335720 -0.449703 -3.029947  
 C 0.469863 -5.752852 -0.725808

-----sbpc-c70-----

114

C -2.974563 -0.714544 3.850344  
 C -2.973232 0.719793 3.850375  
 C -4.046282 1.430870 3.308615  
 C -5.122881 0.709235 2.792634  
 C -5.124222 -0.699913 2.792647  
 C -4.048978 -1.423581 3.308603  
 C -1.676725 -1.146010 4.342793  
 C -1.674617 1.148835 4.342861  
 H -4.027819 2.517038 3.281627  
 H -5.971591 1.241294 2.369471  
 H -5.973958 -1.230359 2.369514  
 H -4.032565 -2.509781 3.281603  
 C 2.527990 -2.480809 3.590506  
 C 1.287897 -3.197710 3.665698  
 C 1.175034 -4.480113 3.124638  
 C 2.305824 -5.052097 2.540838  
 C 3.523594 -4.347612 2.466495  
 C 3.643252 -3.054466 2.976240  
 C 2.287688 -1.149678 4.126083  
 C 0.305078 -2.297673 4.246328  
 H 0.226200 -5.008694 3.157004

H 2.244023 -6.052972 2.120279  
 H 4.381018 -4.817713 1.990742  
 H 4.573326 -2.498195 2.894655  
 C 1.293732 3.194826 3.665140  
 C 2.532427 2.475517 3.589751  
 C 3.648530 3.046769 2.974770  
 C 3.531106 4.339921 2.464540  
 C 2.314752 5.046826 2.539237  
 C 1.183109 4.477288 3.123775  
 C 0.309323 2.296740 4.246095  
 C 2.289787 1.145017 4.125840  
 H 4.577480 2.488653 2.892968  
 H 4.389182 4.808155 1.988122  
 H 2.254759 6.047706 2.118425  
 H 0.235372 5.007800 3.156558  
 N 1.013477 1.183180 4.624376  
 N -1.038998 0.000820 4.741063  
 N 1.011291 -1.185385 4.624549  
 N -1.031507 2.315642 4.182898  
 N -1.035779 -2.314018 4.182938  
 N 2.962319 -0.002963 3.948416  
 B 0.362643 -0.000467 5.266191  
 Cl 0.470543 -0.000432 7.140904  
 C 0.810307 3.217694 -4.386261  
 C 2.023644 2.441709 -4.247985  
 C 0.326332 3.964787 -3.305658  
 C 2.718637 2.443269 -3.040530  
 C 3.279201 1.211573 -2.532697  
 C 3.216853 0.002306 -3.278986  
 C 3.281444 -1.205147 -2.529973  
 C -1.970490 3.215300 -3.798278  
 C -1.463509 2.436745 -4.907312  
 C -1.092332 3.963707 -3.006099  
 C -0.100732 2.438379 -5.196241  
 C 0.554741 1.205636 -5.569653  
 C -0.174509 -0.003683 -5.740116  
 C 0.557032 -1.211233 -5.566964  
 C 2.481948 0.000172 -4.551400  
 C 1.866533 1.207317 -4.982991  
 C 1.868838 -1.209105 -4.980289  
 C -2.271759 3.218419 -0.972640  
 C -3.171228 2.439412 -1.796671  
 C -1.246596 3.966043 -1.563753  
 C -3.024219 2.438334 -3.182092  
 C -3.176043 1.203866 -3.918494  
 C -3.564455 -0.004132 -3.275503  
 C -3.173742 -1.212843 -3.915771  
 C -1.612374 -0.004710 -5.435533  
 C -2.211956 1.203374 -4.984404  
 C -2.209641 -1.212911 -4.981661  
 C 0.323032 3.218150 0.182959  
 C -0.737273 2.441167 0.784300  
 C 0.077842 3.967180 -0.972618  
 C -2.009421 2.441566 0.219879  
 C -2.756158 1.207260 0.136034  
 C -2.262123 0.001583 0.698355  
 C -2.753836 -1.206285 0.138705



C -3.720904 -0.002627 -1.814142  
C -3.476881 1.206940 -1.106611  
C -3.474578 -1.210146 -1.103921  
C 2.228197 3.221740 -1.923837  
C 2.472376 2.444787 -0.727993  
C 1.049962 3.967153 -2.049047  
C 1.535883 2.441372 0.300254  
C 1.228249 1.210314 0.986107  
C 1.922674 0.005571 0.700620  
C 1.230535 -1.199823 0.988810  
C -0.922928 0.003550 1.296179  
C -0.175256 1.209674 1.282909  
C -0.172960 -1.201195 1.285635  
C 2.911556 0.005283 -0.384186  
C 3.128688 1.213217 -1.103249  
C 3.130959 -1.203849 -1.100542  
C 0.329164 -3.211150 0.190180  
C 1.540524 -2.431833 0.305753  
C 2.477032 -2.435833 -0.722481  
C 0.085389 -3.963273 -0.963669  
C -2.265648 -3.219033 -0.965378  
C -2.004750 -2.438949 0.225347  
C -0.732615 -2.434836 0.789724  
C -1.239049 -3.966010 -1.554823  
C -1.964379 -3.221719 -3.791049  
C -3.019593 -2.445381 -3.176600  
C -3.166612 -2.443610 -1.791175  
C -1.084787 -3.966641 -2.997158  
C 0.816435 -3.220128 -4.379010  
C -0.096088 -2.444386 -5.190757  
C -1.458858 -2.444698 -4.901807  
C 0.333880 -3.965702 -3.296708  
C 2.234322 -3.215944 -1.916565  
C 2.723251 -2.439055 -3.035023  
C 2.028284 -2.441549 -4.242514  
C 1.057499 -3.963874 -2.040080

-----sbpc-sc3nc68-----

116

C -3.253869 -0.738311 -3.724819  
C -3.259603 0.695338 -3.718959  
C -4.300088 1.398679 -3.105762  
C -5.339016 0.669143 -2.526070  
C -5.332649 -0.740978 -2.531090  
C -4.287414 -1.456267 -3.116597  
C -1.982208 -1.161583 -4.288130  
C -1.993187 1.134300 -4.283456  
H -4.283698 2.485076 -3.073830  
H -6.161572 1.195036 -2.046297  
H -6.150288 -1.277813 -2.054992  
H -4.259476 -2.542648 -3.091699  
C 2.263163 -2.452043 -3.715538  
C 1.023646 -3.172928 -3.710027  
C 0.932296 -4.424048 -3.093898  
C 2.082136 -4.959045 -2.511497  
C 3.301126 -4.250245 -2.517315  
C 3.400291 -2.988717 -3.105172

C 1.994763 -1.139184 -4.279842  
C 0.011713 -2.295878 -4.277244  
H -0.017377 -4.951990 -3.062259  
H 2.035951 -5.933378 -2.029974  
H 4.173936 -4.689855 -2.039507  
H 4.328390 -2.423457 -3.080430  
C 0.987059 3.182694 -3.715403  
C 2.231411 2.470180 -3.705999  
C 3.358234 3.017257 -3.086363  
C 3.244581 4.281289 -2.505998  
C 2.021168 4.982298 -2.515909  
C 0.880928 4.436430 -3.106588  
C -0.013584 2.294143 -4.283968  
C 1.979621 1.154797 -4.272746  
H 4.289467 2.457907 -3.048746  
H 4.109342 4.728304 -2.020547  
H 1.963951 5.958780 -2.039915  
H -0.072841 4.957491 -3.085838  
N 0.679899 1.190225 -4.717485  
N -1.372083 -0.010028 -4.723510  
N 0.693232 -1.186911 -4.717377  
N -1.348546 2.303064 -4.144219  
N -1.323380 -2.321656 -4.142533  
N 2.669411 0.011870 -4.134416  
B 0.002229 -0.002211 -5.325815  
Cl 0.007983 -0.002267 -7.211648  
C 0.003521 -0.001417 5.578305  
C -0.989156 1.007722 5.367914  
C -2.305991 0.666077 4.904685  
C -2.653747 -0.700839 4.592462  
C -1.664364 -1.704564 4.830918  
C -0.373847 -1.364836 5.365023  
C 0.580914 -2.333049 4.899481  
C 1.939251 -1.951419 4.587337  
C 2.313067 -0.593310 4.829864  
C 1.373477 0.353454 5.366136  
C 1.734501 1.664833 4.901894  
C 0.723873 2.650135 4.591771  
C -0.639019 2.295322 4.833809  
C -1.705760 2.724819 3.952214  
C -2.761245 1.760054 4.068319  
C -1.503839 -2.841198 3.947386  
C -0.139475 -3.271998 4.061371  
C 3.215737 0.116494 3.946434  
C 2.907035 1.513368 4.062719  
C 3.124282 2.395103 2.975263  
C 2.247998 3.532491 2.808647  
C 0.983766 3.587736 3.523319  
C -0.066807 3.862479 2.539185  
C -1.430624 3.379719 2.702902  
C -2.171180 2.962240 1.512615  
C -3.281406 2.035691 1.673662  
C -3.631272 1.508093 2.978995  
C -4.179144 0.181495 2.810486  
C -3.596030 -0.942458 3.523745  
C -3.310178 -1.988680 2.537519  
C -2.209858 -2.928874 2.698302

C -1.477593 -3.358403 1.507142  
C -0.120266 -3.858422 1.667409  
C 0.513583 -3.899516 2.972267  
C 1.936666 -3.710294 2.803223  
C 2.620215 -2.645286 3.518063  
C 3.381760 -1.871782 2.532504  
C 3.643587 -0.448568 2.696148  
C 3.649599 0.403064 1.507137  
C 3.405919 1.828893 1.669436  
C 2.659322 2.617669 0.682676  
C 1.990033 3.693908 1.397874  
C 0.567282 3.905142 1.232851  
C -0.096142 3.276575 0.150106  
C -1.468118 2.866924 0.262463  
C -1.643269 1.729982 -0.615132  
C -2.648120 0.741755 -0.376923  
C -3.591837 0.997002 0.685245  
C -4.191169 -0.120849 1.399091  
C -3.663644 -1.458503 1.231986  
C -2.788139 -1.716817 0.148007  
C -1.746836 -2.699455 0.258644  
C -0.674651 -2.280671 -0.618097  
C 0.683046 -2.657069 -0.379707  
C 0.934223 -3.604685 0.679878  
C 2.202775 -3.566433 1.392243  
C 3.097797 -2.440595 1.226403  
C 2.881563 -1.550351 0.145323  
C 3.211701 -0.157122 0.258125  
C 2.314448 0.563785 -0.618460  
C 1.962799 1.927768 -0.377375  
C 0.608417 2.320889 -0.678300  
C -0.360157 1.370213 -1.145591  
C -2.312738 -0.627409 -0.679161  
C -1.004830 -0.988864 -1.146083  
C 1.700740 -1.681114 -0.681782  
C 1.360210 -0.367068 -1.147570  
C -0.001767 0.004729 -1.360733  
N 0.001923 0.001602 2.098200  
Sc 0.984054 -1.697015 2.070996  
Sc -1.959899 0.000759 2.072532  
Sc 0.987987 1.698084 2.071904

-----sbpc-sc3nc80-----

128

C -3.098597 -4.474145 0.246971  
C -2.668488 -4.434018 1.614671  
C -3.496041 -3.898168 2.604798  
C -4.756335 -3.433614 2.230489  
C -5.180819 -3.477098 0.886840  
C -4.354693 -3.983240 -0.116478  
C -1.973540 -4.946645 -0.543435  
C -1.285538 -4.880659 1.643533  
H -3.153124 -3.837662 3.634083  
H -5.420756 -3.017988 2.984375  
H -6.165921 -3.095582 0.628710  
H -4.667710 -3.989202 -1.157110  
C 1.630851 -4.164777 -3.075868

C 0.233045 -4.252750 -3.384006  
C -0.276261 -3.673772 -4.548161  
C 0.614267 -3.033333 -5.409489  
C 1.988167 -2.949026 -5.108093  
C 2.507065 -3.500930 -3.937077  
C 1.810501 -4.706160 -1.738429  
C -0.424356 -4.850261 -2.233224  
H -1.341276 -3.711870 -4.760837  
H 0.241747 -2.573779 -6.321820  
H 2.650452 -2.425245 -5.793075  
H 3.559714 -3.404969 -3.685161  
C 2.145334 -4.103670 2.682080  
C 3.110465 -4.048049 1.623110  
C 4.324655 -3.380591 1.802088  
C 4.578521 -2.793812 3.041475  
C 3.628877 -2.846888 4.082115  
C 2.403694 -3.490422 3.910851  
C 0.950319 -4.730355 2.140719  
C 2.496745 -4.646283 0.449127  
H 5.041694 -3.317058 0.988031  
H 5.518069 -2.271459 3.205639  
H 3.853231 -2.365036 5.030765  
H 1.656731 -3.504723 4.699788  
N 1.297796 -5.149488 0.881482  
N -1.013030 -5.302347 0.367171  
N 0.587531 -5.214586 -1.382147  
N -0.324275 -4.667698 2.555429  
N -1.709178 -4.797457 -1.850938  
N 2.795676 -4.503028 -0.851430  
B 0.329330 -5.824689 -0.039195  
Cl 0.448384 -7.698117 -0.021624  
C -3.260327 2.081573 2.671518  
C -3.763643 2.980058 1.669284  
C -3.103559 4.249530 1.835456  
C -2.283366 2.786784 3.456396  
C -2.184573 4.120595 2.943170  
C -1.136764 2.116883 3.983344  
C -1.047573 0.704144 3.795217  
C -3.111956 0.689690 2.407451  
C -2.025416 0.003013 3.015701  
C -3.561519 0.200896 1.130246  
C -4.136686 2.517712 0.379589  
C -4.050552 1.108662 0.135549  
C -3.922959 3.378278 -0.735604  
C -2.844276 5.115335 0.722192  
C -3.277621 4.657429 -0.571394  
C -1.645036 5.928813 0.759168  
C -0.945159 4.817035 2.940329  
C -0.697234 5.704855 1.832863  
C 0.083409 2.855977 4.073953  
C 0.180417 4.191547 3.549896  
C 1.348883 2.213114 3.878834  
C 0.223739 0.063188 3.593557  
C 1.429068 0.823272 3.589642  
C -1.362673 -1.077216 2.325219  
C 0.030157 -1.030368 2.683199  
C -2.974788 -0.941614 0.463682

|    |           |           |           |    |                       |           |           |
|----|-----------|-----------|-----------|----|-----------------------|-----------|-----------|
| C  | -1.796443 | -1.546187 | 1.043092  | Sc | 1.803800              | 1.841796  | 0.597732  |
| C  | -3.723826 | 0.573298  | -1.157568 |    | -----cora5CN-c60----- |           |           |
| C  | -3.088455 | -0.717779 | -0.982667 | 95 |                       |           |           |
| C  | -3.571535 | 2.859468  | -2.027476 |    |                       |           |           |
| C  | -3.428714 | 1.456968  | -2.255090 | C  | 0.129579              | -1.176253 | -4.637121 |
| C  | -2.510998 | 4.922080  | -1.778970 | C  | 1.149824              | -0.194226 | -4.645240 |
| C  | -2.691871 | 3.796021  | -2.664996 | C  | 0.531298              | 1.079267  | -4.626816 |
| C  | -0.870680 | 6.206766  | -0.459705 | C  | -0.871342             | 0.884719  | -4.608268 |
| C  | -1.278426 | 5.664344  | -1.745883 | C  | -1.119395             | -0.509568 | -4.613767 |
| C  | 0.628319  | 5.864093  | 1.314247  | C  | 0.321187              | -2.442378 | -4.107242 |
| C  | 0.529646  | 6.127046  | -0.094843 | C  | 2.414787              | -0.414133 | -4.123643 |
| C  | 1.507599  | 4.374193  | 3.028738  | C  | 1.133757              | 2.203729  | -4.086140 |
| C  | 2.240436  | 3.150526  | 3.233020  | C  | -1.751651             | 1.793658  | -4.043994 |
| C  | 1.751659  | 5.184197  | 1.888603  | C  | -2.254509             | -1.077436 | -4.058185 |
| C  | 3.273746  | 2.729584  | 2.330912  | C  | -3.277818             | -0.117057 | -3.660015 |
| C  | 2.481498  | 0.403001  | 2.699160  | C  | -3.028616             | 1.261139  | -3.653231 |
| C  | 3.458174  | 1.306075  | 2.122366  | C  | -1.148181             | 3.067538  | -3.669254 |
| C  | 1.027878  | -1.396031 | 1.747856  | C  | 0.239405              | 3.257076  | -3.689525 |
| C  | 2.261830  | -0.674602 | 1.784765  | C  | 3.147508              | 0.766287  | -3.753682 |
| C  | -0.774568 | -1.978053 | 0.129755  | C  | 2.538703              | 2.027588  | -3.735858 |
| C  | 0.619994  | -1.907765 | 0.485366  | C  | 2.687712              | -1.801420 | -3.765543 |
| C  | -2.011000 | -1.086793 | -1.884934 | C  | 1.676583              | -2.770687 | -3.758355 |
| C  | -0.875206 | -1.745810 | -1.300258 | C  | -0.907192             | -3.126634 | -3.719134 |
| C  | -2.450628 | 1.028939  | -3.190633 | C  | -2.141021             | -2.464053 | -3.695742 |
| C  | -1.727905 | -0.207657 | -2.983731 | H  | -3.784631             | 1.923600  | -3.239375 |
| C  | -1.651083 | 3.356055  | -3.540646 | H  | 0.642722              | 4.185262  | -3.292433 |
| C  | -1.572884 | 1.960681  | -3.835593 | H  | 4.162297              | 0.674255  | -3.374823 |
| C  | -0.250096 | 5.215905  | -2.640154 | H  | 1.909706              | -3.760460 | -3.373884 |
| C  | -0.439954 | 4.105430  | -3.540723 | H  | -3.003392             | -2.988296 | -3.291666 |
| C  | 1.558664  | 5.665181  | -0.991417 | C  | -1.985599             | 4.087262  | -3.123997 |
| C  | 1.152025  | 5.248626  | -2.286036 | N  | -2.700990             | 4.886300  | -2.674671 |
| C  | 2.800100  | 4.807621  | 1.000695  | C  | -4.505876             | -0.608659 | -3.122538 |
| C  | 3.544024  | 3.589851  | 1.209592  | N  | -5.486406             | -1.051082 | -2.680991 |
| C  | 2.703709  | 5.038447  | -0.413251 | C  | -0.817939             | -4.457405 | -3.209444 |
| C  | 3.900687  | 3.062408  | -0.098096 | N  | -0.700077             | -5.536378 | -2.792218 |
| C  | 3.364349  | 3.960970  | -1.092004 | C  | 3.982093              | -2.137281 | -3.265171 |
| C  | 3.826479  | 0.768796  | 0.802141  | N  | 5.045100              | -2.366437 | -2.853300 |
| C  | 3.049935  | -0.439159 | 0.609704  | C  | 3.259156              | 3.145459  | -3.216538 |
| C  | 4.011467  | 1.648632  | -0.341086 | N  | 3.804884              | 4.078494  | -2.787866 |
| C  | 1.375152  | -1.645499 | -0.703167 | C  | -0.767612             | 0.875832  | -1.217939 |
| C  | 0.460565  | -1.525700 | -1.798244 | C  | -1.053624             | -0.542886 | -1.213117 |
| C  | 2.582662  | -0.888999 | -0.675480 | C  | -2.149368             | -1.033347 | -0.498963 |
| C  | -0.394244 | -0.014643 | -3.499593 | C  | -2.999038             | -0.119168 | 0.239091  |
| C  | -0.301185 | 1.318042  | -4.020287 | C  | -2.723141             | 1.251971  | 0.233173  |
| C  | 0.725574  | -0.645322 | -2.889584 | C  | -1.585662             | 1.758428  | -0.509405 |
| C  | 0.829031  | 3.468467  | -3.741043 | C  | 0.670542              | 1.042988  | -1.198889 |
| C  | 1.813315  | 4.177718  | -2.971902 | C  | 1.273946              | -0.273712 | -1.181058 |
| C  | 2.900724  | 3.485949  | -2.357498 | C  | 0.207385              | -1.254162 | -1.189994 |
| C  | 0.919748  | 2.055912  | -3.933837 | C  | 0.331493              | -2.432063 | -0.449589 |
| C  | 3.556777  | 1.192135  | -1.623939 | C  | -2.023063             | -2.256855 | 0.269469  |
| C  | 2.883823  | -0.076938 | -1.798984 | C  | -3.396099             | -0.776387 | 1.470428  |
| C  | 1.973994  | 0.045292  | -2.899750 | C  | -3.497800             | -0.035879 | 2.652064  |
| C  | 3.039258  | 2.093749  | -2.623177 | C  | -3.210285             | 1.387678  | 2.646299  |
| C  | 2.065831  | 1.386558  | -3.405333 | C  | -2.831972             | 2.021369  | 1.459136  |
| N  | -0.121197 | 2.087960  | 0.086241  | C  | -1.763492             | 3.004517  | 1.469081  |
| Sc | -1.248966 | 0.454088  | -0.230710 | C  | -0.993320             | 2.842471  | 0.249646  |
| Sc | -0.895523 | 3.925528  | -0.140894 | C  | 0.395884              | 3.003839  | 0.269420  |

C 1.243535 2.086189 -0.467986  
C 2.429535 -0.504016 -0.430761  
C 3.026692 0.577951 0.329503  
C 2.443497 1.849460 0.311672  
C 2.335740 2.618565 1.537675  
C 1.071393 3.331833 1.511553  
C 0.330473 3.483095 2.687497  
C -1.111931 3.316724 2.665827  
C -1.506440 2.661144 3.899300  
C -2.535919 1.714603 3.889552  
C -2.792297 -2.096496 1.490106  
C -0.648366 -1.056187 5.438438  
C -1.220401 -2.097739 4.702015  
C -0.372218 -3.012489 3.959773  
C 1.016672 -2.852249 3.980829  
C 1.610402 -1.770406 4.745421  
C 1.080436 0.533463 5.454313  
C -0.184012 1.245963 5.428673  
C -1.252588 0.263660 5.418747  
C -2.406497 0.493363 4.663614  
C -3.000975 -0.588022 3.899232  
C -2.418834 -1.859425 3.917961  
C -1.046197 -3.339969 2.716716  
C -0.306420 -3.496315 1.540693  
C 1.135693 -3.330042 1.562536  
C 1.784881 -3.012959 2.759415  
C 2.853171 -2.029438 2.769395  
C 2.744742 -1.262012 3.996637  
C 3.021813 0.108491 3.991268  
C 2.174258 1.023337 4.734140  
C -0.308234 2.421973 4.683062  
C 0.826797 2.929919 3.934235  
C 2.045276 2.244392 3.959949  
C 2.812947 2.084496 2.738311  
C 3.416946 0.764283 2.757907  
C 3.523724 0.024562 1.576155  
C 3.235880 -1.398579 1.581985  
C 2.560298 -1.726070 0.339863  
C 1.531198 -2.673653 0.329697  
C -2.310939 -2.626929 2.690609  
C -0.803685 -2.941783 0.295346  
C 0.793518 -0.889115 5.459945

-----cora5CN-c70-----

105

C -0.013033 -1.553437 4.783669  
C 1.143141 -0.742159 4.870867  
C 0.723270 0.603028 4.997713  
C -0.692043 0.622113 4.995667  
C -1.147238 -0.711826 4.867879  
C -0.020701 -2.767549 4.117084  
C 2.360356 -1.093725 4.311151  
C 1.484812 1.677043 4.566703  
C -1.435005 1.706998 4.559976  
C -2.367395 -1.044212 4.303585  
C -3.247833 0.093845 4.061745  
C -2.790272 1.413321 4.177037

C -0.648783 2.906474 4.296805  
C 0.753273 2.885339 4.302001  
C 3.263198 -0.003168 4.060691  
C 2.849017 1.330215 4.181607  
C 2.418396 -2.462939 3.810495  
C 1.268608 -3.257926 3.710995  
C -1.344678 -3.217332 3.700952  
C -2.468477 -2.385077 3.794643  
H -3.452785 2.219998 3.873684  
H 1.285517 3.780449 3.989950  
H 4.255565 -0.203674 3.665288  
H 1.349080 -4.227990 3.227095  
H -3.407545 -2.731485 3.371319  
C -1.327389 4.087678 3.869215  
N -1.917562 5.022183 3.507787  
C -4.563833 -0.150618 3.565309  
N -5.627518 -0.392924 3.162727  
C -1.466151 -4.487415 3.059988  
N -1.520164 -5.524888 2.537669  
C 3.654463 -2.950532 3.288365  
N 4.679557 -3.308721 2.872479  
C 3.737220 2.376611 3.788365  
N 4.426891 3.257188 3.470414  
C 3.139870 -2.199028 -1.015712  
C 2.367456 -2.047766 0.196352  
C 3.921912 -1.137389 -1.485182  
C 2.408596 -0.848942 0.902231  
C 1.195040 -0.308170 1.464998  
C -0.035284 -1.012725 1.396079  
C -1.213427 -0.224713 1.468696  
C 3.154316 -1.574652 -3.786519  
C 2.339602 -2.664599 -3.293688  
C 3.929910 -0.819823 -2.900090  
C 2.333581 -2.972304 -1.935581  
C 1.089327 -3.313600 -1.283955  
C -0.126045 -3.433482 -2.013415  
C -1.327076 -3.229100 -1.279169  
C -0.080685 -2.277195 0.652514  
C 1.111285 -2.742554 0.034487  
C -1.303853 -2.657721 0.038248  
C 3.251257 1.251953 -4.050732  
C 2.444551 0.466874 -4.959263  
C 3.979854 0.623655 -3.035342  
C 2.396960 -0.919038 -4.830201  
C 1.139026 -1.612092 -4.990542  
C -0.046521 -0.923863 -5.368823  
C -1.275415 -1.528694 -4.985864  
C -0.118058 -3.109513 -3.447011  
C 1.103797 -2.690638 -4.041694  
C -1.310633 -2.606837 -4.036297  
C 3.296950 2.378390 -1.442823  
C 2.539366 3.020402 -2.495334  
C 4.002655 1.198003 -1.703635  
C 2.516533 2.467745 -3.773641  
C 1.280516 2.438445 -4.522022  
C 0.093572 3.041356 -4.022318  
C -1.134117 2.521360 -4.516593

|   |           |           |           |
|---|-----------|-----------|-----------|
| C | 0.004035  | 0.538581  | -5.505228 |
| C | 1.236204  | 1.202434  | -5.254004 |
| C | -1.178500 | 1.285395  | -5.248753 |
| C | 3.226480  | 0.246039  | 0.433369  |
| C | 2.490979  | 1.464039  | 0.691868  |
| C | 3.967261  | 0.109611  | -0.746699 |
| C | 2.525674  | 2.510362  | -0.226344 |
| C | 1.317544  | 3.245277  | -0.523593 |
| C | 0.100285  | 2.989679  | 0.165726  |
| C | -1.098808 | 3.329734  | -0.518636 |
| C | 0.116744  | 3.623395  | -2.672904 |
| C | 1.325168  | 3.558975  | -1.925946 |
| C | -1.090275 | 3.643256  | -1.920838 |
| C | 0.063946  | 1.882489  | 1.128995  |
| C | 1.244928  | 1.120018  | 1.334069  |
| C | -1.165388 | 1.203469  | 1.338818  |
| C | -3.137231 | 2.602055  | -1.429448 |
| C | -2.353795 | 2.680894  | -0.215741 |
| C | -2.388166 | 1.633993  | 0.702785  |
| C | -3.923069 | 1.472812  | -1.687320 |
| C | -3.180468 | 1.474995  | -4.037635 |
| C | -2.361918 | 2.636700  | -3.763375 |
| C | -2.341169 | 3.189726  | -2.485231 |
| C | -3.945997 | 0.898026  | -3.019003 |
| C | -3.278143 | -1.352577 | -3.773120 |
| C | -2.482126 | -0.750395 | -4.820660 |
| C | -2.433907 | 0.635657  | -4.949694 |
| C | -3.995307 | -0.545429 | -2.883530 |
| C | -3.295927 | -1.977303 | -1.002060 |
| C | -2.548046 | -2.803687 | -1.925260 |
| C | -2.538797 | -2.495970 | -3.283448 |
| C | -4.003574 | -0.862993 | -1.468623 |
| C | -3.204627 | 0.468842  | 0.444347  |
| C | -2.463731 | -0.680048 | 0.911142  |
| C | -2.509984 | -1.880916 | 0.207622  |
| C | -3.959076 | 0.384231  | -0.730731 |

-----cora5CN-sc3nc68-----

107

|   |           |           |           |
|---|-----------|-----------|-----------|
| C | -0.424786 | -1.120887 | -4.880295 |
| C | 0.688412  | -0.247744 | -4.937788 |
| C | 0.204057  | 1.082677  | -4.905035 |
| C | -1.207910 | 1.030825  | -4.825905 |
| C | -1.597061 | -0.330533 | -4.811900 |
| C | -0.341797 | -2.395990 | -4.345345 |
| C | 1.945745  | -0.593084 | -4.471412 |
| C | 0.939245  | 2.143593  | -4.400725 |
| C | -1.970383 | 2.030240  | -4.242052 |
| C | -2.762614 | -0.777214 | -4.210069 |
| C | -3.667452 | 0.284461  | -3.788991 |
| C | -3.279339 | 1.631805  | -3.804319 |
| C | -1.224368 | 3.236138  | -3.900780 |
| C | 0.173603  | 3.285171  | -3.982087 |
| C | 2.808976  | 0.507922  | -4.141942 |
| C | 2.332536  | 1.825204  | -4.107649 |
| C | 2.091708  | -2.000455 | -4.116362 |
| C | 0.987081  | -2.859495 | -4.051939 |

|   |           |           |           |
|---|-----------|-----------|-----------|
| C | -1.615913 | -2.951072 | -3.904171 |
| C | -2.774618 | -2.166360 | -3.837583 |
| H | -3.949550 | 2.368706  | -3.368706 |
| H | 0.684023  | 4.169275  | -3.608739 |
| H | 3.823683  | 0.314993  | -3.804194 |
| H | 1.134692  | -3.867380 | -3.672605 |
| H | -3.668696 | -2.597908 | -3.395002 |
| C | -1.930160 | 4.336150  | -3.325740 |
| N | -2.542727 | 5.201873  | -2.848652 |
| C | -4.912097 | -0.075444 | -3.189678 |
| N | -5.906315 | -0.412027 | -2.689047 |
| C | -1.642059 | -4.282625 | -3.389544 |
| N | -1.619162 | -5.368588 | -2.974115 |
| C | 3.370486  | -2.472604 | -3.691476 |
| N | 4.426403  | -2.818173 | -3.348144 |
| C | 3.190418  | 2.864180  | -3.635287 |
| N | 3.856383  | 3.733105  | -3.243124 |
| C | -0.326837 | 0.083071  | 5.317800  |
| C | -1.211545 | 1.138848  | 4.930507  |
| C | -2.458641 | 0.851973  | 4.276016  |
| C | -2.841070 | -0.503405 | 3.952318  |
| C | -1.960725 | -1.549367 | 4.367114  |
| C | -0.749985 | -1.263230 | 5.086208  |
| C | 0.204191  | -2.298678 | 4.795911  |
| C | 1.613224  | -2.004647 | 4.684343  |
| C | 2.027248  | -0.662048 | 4.943636  |
| C | 1.077482  | 0.352145  | 5.305071  |
| C | 1.582481  | 1.623946  | 4.864411  |
| C | 0.695479  | 2.656410  | 4.382333  |
| C | -0.707779 | 2.384075  | 4.421338  |
| C | -1.598230 | 2.838683  | 3.374492  |
| C | -2.714934 | 1.936946  | 3.349898  |
| C | -1.735030 | -2.722111 | 3.548756  |
| C | -0.434487 | -3.223978 | 3.882438  |
| C | 3.093852  | -0.037850 | 4.190964  |
| C | 2.857008  | 1.377614  | 4.219603  |
| C | 3.299312  | 2.210840  | 3.162721  |
| C | 2.526321  | 3.388584  | 2.835268  |
| C | 1.173404  | 3.542302  | 3.346564  |
| C | 0.301664  | 3.831694  | 2.203807  |
| C | -1.096926 | 3.432668  | 2.167253  |
| C | -1.672671 | 3.015446  | 0.890855  |
| C | -2.850950 | 2.162946  | 0.904607  |
| C | -3.432801 | 1.702319  | 2.151636  |
| C | -4.024002 | 0.400054  | 1.937885  |
| C | -3.626776 | -0.730446 | 2.761634  |
| C | -3.249946 | -1.821746 | 1.858644  |
| C | -2.246623 | -2.814607 | 2.209966  |
| C | -1.372316 | -3.328619 | 1.157499  |
| C | -0.088479 | -3.895640 | 1.536995  |
| C | 0.336531  | -3.923123 | 2.922509  |
| C | 1.775869  | -3.819343 | 2.968723  |
| C | 2.404664  | -2.770457 | 3.750065  |
| C | 3.354114  | -2.078800 | 2.874867  |
| C | 3.674411  | -0.669221 | 3.039067  |
| C | 3.912979  | 0.137977  | 1.843769  |
| C | 3.734513  | 1.579551  | 1.930013  |

|                           |           |           |           |   |           |           |           |
|---------------------------|-----------|-----------|-----------|---|-----------|-----------|-----------|
| C                         | 3.187536  | 2.367310  | 0.823138  | H | 3.794249  | 0.259372  | -4.534850 |
| C                         | 2.486120  | 3.500359  | 1.399466  | H | 0.985603  | -3.839476 | -4.364192 |
| C                         | 1.124811  | 3.783745  | 1.012159  | H | -3.763194 | -2.432187 | -3.921475 |
| C                         | 0.597976  | 3.167671  | -0.149888 | C | -1.814917 | 4.431950  | -3.802359 |
| C                         | -0.794178 | 2.834359  | -0.230617 | N | -2.380917 | 5.299388  | -3.273532 |
| C                         | -0.902907 | 1.677908  | -1.091623 | C | -4.915256 | 0.115045  | -3.631966 |
| C                         | -1.987533 | 0.758254  | -0.982290 | N | -5.895069 | -0.202359 | -3.091983 |
| C                         | -3.062645 | 1.104103  | -0.085670 | C | -1.791081 | -4.176356 | -4.000036 |
| C                         | -3.824841 | 0.048887  | 0.556193  | N | -1.790793 | -5.264851 | -3.590612 |
| C                         | -3.361503 | -1.317117 | 0.504869  | C | 3.261518  | -2.510122 | -4.437556 |
| C                         | -2.357629 | -1.668035 | -0.430392 | N | 4.318835  | -2.885934 | -4.132652 |
| C                         | -1.408363 | -2.700615 | -0.134170 | C | 3.243562  | 2.825644  | -4.317605 |
| C                         | -0.192394 | -2.378096 | -0.848093 | N | 3.947343  | 3.673691  | -3.946504 |
| C                         | 1.088997  | -2.822736 | -0.397183 | C | -2.628076 | -0.168918 | 4.866440  |
| C                         | 1.117541  | -3.740526 | 0.717313  | C | -3.311808 | 0.644177  | 3.898042  |
| C                         | 2.261554  | -3.742843 | 1.614792  | C | -2.737205 | 1.964159  | 3.936082  |
| C                         | 3.237756  | -2.677230 | 1.557362  | C | -1.624960 | 0.641418  | 5.502422  |
| C                         | 3.243643  | -1.817229 | 0.432237  | C | -1.689406 | 1.953714  | 4.930514  |
| C                         | 3.634698  | -0.441516 | 0.559437  | C | -0.376789 | 0.081159  | 5.913404  |
| C                         | 2.931260  | 0.296742  | -0.466623 | C | -0.200968 | -1.329468 | 5.769626  |
| C                         | 2.626226  | 1.685205  | -0.317679 | C | -2.404431 | -1.557151 | 4.641346  |
| C                         | 1.362660  | 2.147384  | -0.837123 | C | -1.205924 | -2.135221 | 5.142257  |
| C                         | 0.420286  | 1.229190  | -1.411043 | C | -2.960669 | -2.139215 | 3.445622  |
| C                         | -1.697391 | -0.636931 | -1.203812 | C | -3.793614 | 0.096436  | 2.680735  |
| C                         | -0.358731 | -1.086287 | -1.452947 | C | -3.624056 | -1.313327 | 2.481807  |
| C                         | 2.200569  | -1.916095 | -0.566818 | C | -3.781556 | 0.916177  | 1.516272  |
| C                         | 2.014521  | -0.600275 | -1.112512 | C | -2.672268 | 2.789710  | 2.765360  |
| C                         | 0.722959  | -0.158865 | -1.531289 | C | -3.216761 | 2.241943  | 1.553171  |
| N                         | 0.199055  | -0.036523 | 1.891408  | C | -1.546319 | 3.692039  | 2.628054  |
| Sc                        | 1.074487  | -1.789878 | 2.045158  | C | -0.515110 | 2.734289  | 4.750648  |
| Sc                        | -1.741638 | 0.097769  | 1.608665  | C | -0.467257 | 3.583848  | 3.587735  |
| Sc                        | 1.292659  | 1.592401  | 2.030481  | C | 0.785024  | 0.908343  | 5.825830  |
| -----cora5CN-sc3nc80----- |           |           |           |   |           |           |           |
| 119                       |           |           |           |   |           |           |           |
| C                         | -0.526807 | -1.035329 | -5.498858 | C | 2.217062  | -1.043675 | 5.263687  |
| C                         | 0.609775  | -0.194597 | -5.579826 | C | -0.547979 | -3.200499 | 4.420848  |
| C                         | 0.166564  | 1.148908  | -5.513297 | C | 0.870941  | -3.037853 | 4.606737  |
| C                         | -1.243259 | 1.137931  | -5.389947 | C | -2.378272 | -3.275593 | 2.760035  |
| C                         | -1.672759 | -0.211467 | -5.383415 | C | -1.089964 | -3.759632 | 3.216814  |
| C                         | -0.465018 | -2.318813 | -4.980556 | C | -3.417291 | -1.887482 | 1.181136  |
| C                         | 1.869770  | -0.583044 | -5.154826 | C | -2.673883 | -3.124744 | 1.327074  |
| C                         | 0.948721  | 2.179497  | -5.015694 | C | -3.544578 | 0.363080  | 0.213302  |
| C                         | -1.956257 | 2.150258  | -4.766782 | C | -3.324542 | -1.034257 | 0.023606  |
| C                         | -2.830249 | -0.631513 | -4.747935 | C | -2.619840 | 2.507106  | 0.255060  |
| C                         | -3.687474 | 0.449250  | -4.279332 | C | -2.818773 | 1.330522  | -0.558348 |
| C                         | -3.260978 | 1.784275  | -4.289458 | C | -0.945059 | 3.974227  | 1.316117  |
| C                         | -1.163868 | 3.326940  | -4.430019 | C | -1.456026 | 3.340755  | 0.111708  |
| C                         | 0.231758  | 3.335445  | -4.554342 | C | 0.773066  | 3.812904  | 2.909292  |
| C                         | 2.775386  | 0.486897  | -4.836936 | C | 0.491959  | 4.007794  | 1.513712  |
| C                         | 2.340345  | 1.816773  | -4.770634 | C | 1.957982  | 2.471623  | 4.561471  |
| C                         | 1.984658  | -1.997996 | -4.819951 | C | 2.800968  | 1.315399  | 4.724227  |
| C                         | 0.857244  | -2.824352 | -4.730974 | C | 2.004981  | 3.243718  | 3.371589  |
| C                         | -1.740687 | -2.841486 | -4.504514 | C | 3.750150  | 0.927789  | 3.721361  |
| C                         | -2.872067 | -2.023789 | -4.391000 | C | 3.190601  | -1.430992 | 4.273162  |
| H                         | -3.893788 | 2.533395  | -3.820255 | C | 4.017814  | -0.486872 | 3.547930  |
| H                         | 0.780595  | 4.195284  | -4.178650 | C | 1.782139  | -3.382245 | 3.574789  |

|    |           |           |           |
|----|-----------|-----------|-----------|
| C  | 2.956146  | -2.570599 | 3.437671  |
| C  | -0.148734 | -4.155338 | 2.203837  |
| C  | 1.270164  | -3.978346 | 2.387821  |
| C  | -1.676278 | -3.449167 | 0.320339  |
| C  | -0.431909 | -3.997653 | 0.787124  |
| C  | -2.427596 | -1.435127 | -1.001408 |
| C  | -1.593753 | -2.604239 | -0.837125 |
| C  | -1.850114 | 0.923445  | -1.522619 |
| C  | -1.698231 | -0.471887 | -1.770991 |
| C  | -0.504369 | 2.921573  | -0.877429 |
| C  | -0.710294 | 1.754817  | -1.695857 |
| C  | 1.444991  | 3.581002  | 0.519833  |
| C  | 0.923112  | 3.074332  | -0.700447 |
| C  | 2.968733  | 2.903908  | 2.380477  |
| C  | 3.820769  | 1.752381  | 2.545066  |
| C  | 2.692346  | 3.061620  | 0.980423  |
| C  | 4.064758  | 1.191482  | 1.226644  |
| C  | 3.352694  | 2.003956  | 0.269860  |
| C  | 4.274142  | -1.057639 | 2.216794  |
| C  | 3.578789  | -2.328850 | 2.165366  |
| C  | 4.256559  | -0.220467 | 1.027695  |
| C  | 1.863259  | -3.724917 | 1.104550  |
| C  | 0.819373  | -3.720763 | 0.121683  |
| C  | 2.999315  | -2.871356 | 0.962413  |
| C  | -0.346090 | -2.340306 | -1.507354 |
| C  | -0.413758 | -1.027816 | -2.076478 |
| C  | 0.883947  | -2.866639 | -1.020542 |
| C  | 0.570044  | 1.202512  | -2.020834 |
| C  | 1.580560  | 2.019566  | -1.412648 |
| C  | 2.783631  | 1.437583  | -0.909886 |
| C  | 0.745815  | -0.203967 | -2.167226 |
| C  | 3.693303  | -0.768086 | -0.173028 |
| C  | 3.102761  | -2.087825 | -0.216636 |
| C  | 2.063453  | -2.083266 | -1.202233 |
| C  | 2.995997  | 0.047496  | -1.135689 |
| C  | 1.992725  | -0.763933 | -1.761013 |
| N  | 0.177266  | -0.060917 | 1.920330  |
| Sc | -0.908868 | -1.747519 | 1.830253  |
| Sc | -0.713133 | 1.726121  | 1.709905  |
| Sc | 2.161748  | -0.159172 | 2.211733  |
